# Supplementary material for: Conjugated C-6 hydroxylated bile acids in serum relate to human metabolic health and gut Clostridia species
Source: Sci Rep. 2021 Jun 24;11:13252. doi: 10.1038/s41598-021-91482-y (PMC8225906; doi:10.1038/s41598-021-91482-y)
Supplement: Supplementary file 2 — Supplementary Information 2. [file 41598_2021_91482_MOESM2_ESM.xlsx]

## Sheet: Reaction_List
Supplementary Dataset 1 Reactions and related metabolites in human luminal/intestinal hLC_001 cell model
Abbreviation_VMH	Description	Reaction	Subsystem
ARGSS	Argininosuccinate Synthase	atp[c] + asp_L[c] + citr_L[c] -> h[c] + amp[c] + ppi[c] + argsuc[c]	Alanine and aspartate metabolism
ASPTAm	Aspartate Transaminase	akg[m] + asp_L[m] <=> glu_L[m] + oaa[m]	Alanine and aspartate metabolism
DASPO1p	D-Aspartate Oxidase, Peroxisomal	o2[x] + h2o[x] + asp_D[x] -> h2o2[x] + nh4[x] + oaa[x]	Alanine and aspartate metabolism
ASPTA	Aspartate Transaminase	akg[c] + asp_L[c] <=> glu_L[c] + oaa[c]	Alanine and aspartate metabolism
ARGSL	Argininosuccinate Lyase	argsuc[c] <=> fum[c] + arg_L[c]	Alanine and aspartate metabolism
ADMDC	Adenosylmethionine Decarboxylase	h[c] + amet[c] -> co2[c] + ametam[c]	Arginine and proline metabolism
DKMPPD	2, 3-Diketo-5-Methylthio-1-Phosphopentane Degradation Reaction	h2o[c] + o2[c] + dkmpp[c] -> 2 h[c] + pi[c] + for[c] + 2kmb[c]	Arginine and proline metabolism
G5SADrm	L-Glutamate 5-Semialdehyde Dehydratase, Reversible, Mitochondrial	glu5sa[m] <=> h2o[m] + h[m] + 1pyr5c[m]	Arginine and proline metabolism
MDRPD	5-Methylthio-5-Deoxy-D-Ribulose 1-Phosphate Dehydratase	5mdru1p[c] -> h2o[c] + dkmpp[c]	Arginine and proline metabolism
MTAP	5'-Methylthioadenosine Phosphorylase	pi[c] + 5mta[c] -> ade[c] + 5mdr1p[c]	Arginine and proline metabolism
NOS1	Nitric Oxide Synthase (Intermediate Forming)	o2[c] + h[c] + nadph[c] + arg_L[c] -> h2o[c] + nadp[c] + nwharg[c]	Arginine and proline metabolism
NOS2	Nitric Oxide Synthase (No Forming)	o2[c] + nadph[c] + nwharg[c] -> h2o[c] + h[c] + nadp[c] + citr_L[c] + no[c]	Arginine and proline metabolism
P5CRm	Pyrroline-5-Carboxylate Reductase, Mitochondrial	2 h[m] + nadph[m] + 1pyr5c[m] -> nadp[m] + pro_L[m]	Arginine and proline metabolism
P5CRxm	Pyrroline-5-Carboxylate Reductase, Mitochondrial	2 h[m] + nadh[m] + 1pyr5c[m] -> nad[m] + pro_L[m]	Arginine and proline metabolism
PTRCOX1	Putrescine:Oxygen Oxidoreductase (Deaminating)	h2o[c] + o2[c] + ptrc[c] -> h2o2[c] + nh4[c] + 4abutn[c]	Arginine and proline metabolism
P5CR	Pyrroline-5-Carboxylate Reductase	2 h[c] + nadph[c] + 1pyr5c[c] -> nadp[c] + pro_L[c]	Arginine and proline metabolism
MTRI	5-Methylthioribose-1-Phosphate Isomerase	5mdr1p[c] <=> 5mdru1p[c]	Arginine and proline metabolism
ABUTD	Aminobutyraldehyde Dehydrogenase	h2o[c] + nad[c] + 4abutn[c] -> 2 h[c] + nadh[c] + 4abut[c]	Beta-Alanine metabolism
biomass_reaction	Generic Human Biomass Reaction	20.6508 h2o[c] + 20.7045 atp[c] + 0.38587 glu_L[c] + 0.35261 asp_L[c] + 0.036117 gtp[c] + 0.50563 ala_L[c] + 0.27942 asn_L[c] + 0.046571 cys_L[c] + 0.326 gln_L[c] + 0.53889 gly[c] + 0.39253 ser_L[c] + 0.31269 thr_L[c] + 0.59211 lys_L[c] + 0.35926 arg_L[c] + 0.15302 met_L[c] + 0.039036 ctp[c] + 0.15446 pchol_hs[c] + 0.055374 pe_hs[c] + 0.020401 chsterol[c] + 0.009898 dgtp[n] + 0.009442 dctp[n] + 0…	Biomass
ACITL	ATP-Citrate Lyase	atp[c] + coa[c] + cit[c] -> adp[c] + pi[c] + accoa[c] + oaa[c]	Citric acid cycle
ACONTm	Aconitate Hydratase	cit[m] <=> icit[m]	Citric acid cycle
AKGDm	2-Oxoglutarate Dehydrogenase	akg[m] + nad[m] + coa[m] -> nadh[m] + co2[m] + succoa[m]	Citric acid cycle
CSm	Citrate Synthase	h2o[m] + accoa[m] + oaa[m] -> h[m] + coa[m] + cit[m]	Citric acid cycle
ICDHxm	Isocitrate Dehydrogenase (NAD+)	nad[m] + icit[m] -> akg[m] + nadh[m] + co2[m]	Citric acid cycle
MDHm	Malate Dehydrogenase, Mitochondrial	nad[m] + mal_L[m] <=> h[m] + nadh[m] + oaa[m]	Citric acid cycle
SUCD1m	Succinate Dehydrogenase	fad[m] + succ[m] <=> fadh2[m] + fum[m]	Citric acid cycle
SUCOAS1m	Succinate- Coenzyme A Ligase (GDP-Forming)	coa[m] + gtp[m] + succ[m] <=> pi[m] + gdp[m] + succoa[m]	Citric acid cycle
SUCOASm	Succinate- Coenzyme A Ligase (ADP-Forming)	coa[m] + atp[m] + succ[m] <=> adp[m] + pi[m] + succoa[m]	Citric acid cycle
MDHx	Malate Dehydrogenase, Peroxisomal	nad[x] + mal_L[x] <=> h[x] + nadh[x] + oaa[x]	Citric acid cycle
ACONT	Aconitase	cit[c] <=> icit[c]	Citric acid cycle
FUM	Fumarase	h2o[c] + fum[c] <=> mal_L[c]	Citric acid cycle
MDH	Malate Dehydrogenase	nad[c] + mal_L[c] <=> h[c] + nadh[c] + oaa[c]	Citric acid cycle
DPCOAK	Dephospho Coenzyme A Kinase	atp[c] + dpcoa[c] -> h[c] + adp[c] + coa[c]	CoA synthesis
PNTK	Pantothenate Kinase	atp[c] + pnto_R[c] -> h[c] + adp[c] + 4ppan[c]	CoA synthesis
PPCDC	Phosphopantothenoylcysteine Decarboxylase	h[c] + 4ppcys[c] -> co2[c] + pan4p[c]	CoA synthesis
PPNCL3	Phosphopantothenate-Cysteine Ligase	atp[c] + cys_L[c] + 4ppan[c] -> h[c] + amp[c] + ppi[c] + 4ppcys[c]	CoA synthesis
PTPAT	Phosphopantetheine Adenylyltransferase (Ec 2.7.7.3)	h[c] + atp[c] + pan4p[c] -> ppi[c] + dpcoa[c]	CoA synthesis
DALAOXx	D-Alanine Oxidase, Peroxisomal	o2[x] + h2o[x] + ala_D[x] -> h2o2[x] + pyr[x] + nh4[x]	D-alanine metabolism
DALAxt	D-Alanine Transport to Perixosome	ala_D[c] -> ala_D[x]	D-alanine metabolism
PYRt2p	Pyruvate Peroxisomal Transport via Proton Symport	h[c] + pyr[c] <=> h[x] + pyr[x]	D-alanine metabolism
BGLUGCHe	Binding of Betaglucans with Glycocholate	gchola[e] + bglc[e] -> glgchlo[e]	Dietary fiber binding
BGLUTCHLe	Binding of Betaglucans with Taurocholate	tchola[e] + bglc[e] -> gltcho[e]	Dietary fiber binding
BGLUTDECHOe	Binding of Betaglucans with Taurodeoxycholate	bglc[e] + tdechola[e] -> gltdechol[e]	Dietary fiber binding
GUMDCHAe	Binding of Guar Gums with Deoxyxholic Acid	dchac[e] + gum[e] -> gumdchac[e]	Dietary fiber binding
GUMGCHLe	Binding of Guar Gums with Glycocholate	gchola[e] + gum[e] -> gumgchol[e]	Dietary fiber binding
GUMTCHOLe	Binding of Guar Gums with Taurocholate	tchola[e] + gum[e] -> gumtchol[e]	Dietary fiber binding
PECDCHe	Binding of Pectins with Deoxycholic Acid	h[e] + dchac[e] + pect[e] -> pectindchac[e]	Dietary fiber binding
PECGCHLe	Binding of Pectins with Glycocholate	h[e] + gchola[e] + pect[e] -> pectingchol[e]	Dietary fiber binding
PECTCHLe	Binding of Pectins with Taurocholate	h[e] + tchola[e] + pect[e] -> pectintchol[e]	Dietary fiber binding
PSYGCHe	Binding of Psyllium with Glycocholate	gchola[e] + psyl[e] -> psylchol[e]	Dietary fiber binding
PSYTCHe	Binding of Psyllium with Taurocholate	tchola[e] + psyl[e] -> psyltchol[e]	Dietary fiber binding
PSYTDECHe	Binding of Psyllium with Taurodeoxycholate	tdechola[e] + psyl[e] -> psyltdechol[e]	Dietary fiber binding
EX_chol[e]	Exchange of Choline	chol[e] <=>	Exchange/demand reaction
EX_chsterol[e]	Exchange of Cholesterol	chsterol[e] <=>	Exchange/demand reaction
EX_HC02220[e]	Chenodeoxycholic acid 3-sulfate exchange	HC02220[e] <=>	Exchange/demand reaction
EX_HC02197[e]	Exchange of Sulfoglycolithocholate	HC02197[e] <=>	Exchange/demand reaction
EX_glgchlo[e]	Exchange of Beta Glucan-Glycocholate Complex	glgchlo[e] <=>	Exchange/demand reaction
EX_gltcho[e]	Exchange of Beta Glucan-Taurocholic Acid Complex	gltcho[e] <=>	Exchange/demand reaction
EX_gltdechol[e]	Exchange of Beta Glucan-Taurodeoxycholic Acid Complex	gltdechol[e] <=>	Exchange/demand reaction
EX_glyclt[e]	Exchange of Glycolate	glyclt[e] <=>	Exchange/demand reaction
EX_12dhchol[e]	EX_12dhchol(e)	12dhchol[e] <=>	Exchange/demand reaction
EX_3dhcdchol[e]	EX_3dhcdchol(e)	3dhcdchol[e] <=>	Exchange/demand reaction
EX_3dhchol[e]	EX_3dhchol(e)	3dhchol[e] <=>	Exchange/demand reaction
EX_3dhdchol[e]	EX_3dhdchol(e)	3dhdchol[e] <=>	Exchange/demand reaction
EX_3dhlchol[e]	EX_3dhlchol(e)	3dhlchol[e] <=>	Exchange/demand reaction
EX_7dhcdchol[e]	EX_7dhcdchol(e)	7dhcdchol[e] <=>	Exchange/demand reaction
EX_7dhchol[e]	EX_7dhchol(e)	7dhchol[e] <=>	Exchange/demand reaction
EX_cdca24g[e]	EX_cdca24g(e)	cdca24g[e] <=>	Exchange/demand reaction
EX_cdca3g[e]	EX_cdca3g(e)	cdca3g[e] <=>	Exchange/demand reaction
EX_dca24g[e]	EX_dca24g(e)	dca24g[e] <=>	Exchange/demand reaction
EX_dca3g[e]	EX_dca3g(e)	dca3g[e] <=>	Exchange/demand reaction
EX_dca3s[e]	EX_dca3s(e)	dca3s[e] <=>	Exchange/demand reaction
EX_gca3s[e]	EX_gca3s(e)	gca3s[e] <=>	Exchange/demand reaction
EX_gcdca3s[e]	EX_gcdca3s(e)	gcdca3s[e] <=>	Exchange/demand reaction
EX_gdca3s[e]	EX_gdca3s(e)	gdca3s[e] <=>	Exchange/demand reaction
EX_gudca3s[e]	EX_gudca3s(e)	gudca3s[e] <=>	Exchange/demand reaction
EX_hca24g[e]	EX_hca24g(e)	hca24g[e] <=>	Exchange/demand reaction
EX_hca6g[e]	EX_hca6g(e)	hca6g[e] <=>	Exchange/demand reaction
EX_hdca24g[e]	EX_hdca24g(e)	hdca24g[e] <=>	Exchange/demand reaction
EX_hdca6g[e]	EX_hdca6g(e)	hdca6g[e] <=>	Exchange/demand reaction
EX_icdchol[e]	EX_icdchol(e)	icdchol[e] <=>	Exchange/demand reaction
EX_isochol[e]	EX_isochol(e)	isochol[e] <=>	Exchange/demand reaction
EX_lca24g[e]	EX_lca24g(e)	lca24g[e] <=>	Exchange/demand reaction
EX_lca3g[e]	EX_lca3g(e)	lca3g[e] <=>	Exchange/demand reaction
EX_lca3s[e]	EX_lca3s(e)	lca3s[e] <=>	Exchange/demand reaction
EX_tca3s[e]	EX_tca3s(e)	tca3s[e] <=>	Exchange/demand reaction
EX_tcdca3s[e]	EX_tcdca3s(e)	tcdca3s[e] <=>	Exchange/demand reaction
EX_tdca3s[e]	EX_tdca3s(e)	tdca3s[e] <=>	Exchange/demand reaction
EX_tudca3s[e]	EX_tudca3s(e)	tudca3s[e] <=>	Exchange/demand reaction
EX_uchol[e]	EX_uchol(e)	uchol[e] <=>	Exchange/demand reaction
EX_udca3s[e]	EX_udca3s(e)	udca3s[e] <=>	Exchange/demand reaction
EX_7klitchol[e]	Exchange of 7-Ketolithocholate	7klitchol[e] <=>	Exchange/demand reaction
EX_taur[e]	Exchange of Taurine	taur[e] <=>	Exchange/demand reaction
EX_hyochol[e]	EX_hyochol(e)	hyochol[e] <=>	Exchange/demand reaction
EX_ghyochol[e]	EX_ghyochol(e)	ghyochol[e] <=>	Exchange/demand reaction
EX_thyochol[e]	EX_thyochol(e)	thyochol[e] <=>	Exchange/demand reaction
Ex_TaMCA[e]	Exchange of Taurine-alpha-mucricholic acid	TaMCA[e] <=>	Exchange/demand reaction
EX_gM02155[e]	Exchange of glycohyodeoxycholic Acid	gM02155[e] <=>	Exchange/demand reaction
EX_M02155[e]	Exchange of hyodeoxycholic Acid	M02155[e] <=>	Exchange/demand reaction
EX_7ocholate[e]	alpha,12alpha-Dihydroxy-7-oxo-5beta-cholanate exchange	7ocholate[e] <=>	Exchange/demand reaction
EX_dchac[e]	Exchange of Deoxycholic Acid	dchac[e] <=>	Exchange/demand reaction
EX_M01989[e]	Exchange of Glycodeoxycholic Acid	M01989[e] <=>	Exchange/demand reaction
EX_tdechola[e]	Exchange of Taurodeoxycholic Acid	tdechola[e] <=>	Exchange/demand reaction
EX_cholate[e]	Exchange of Cholate	cholate[e] <=>	Exchange/demand reaction
EX_tchola[e]	Exchange of Taurocholic Acid	tchola[e] <=>	Exchange/demand reaction
EX_gchola[e]	Exchange of Glycocholate	gchola[e] <=>	Exchange/demand reaction
EX_HC02191[e]	Exchange of Lithocholate	HC02191[e] <=>	Exchange/demand reaction
EX_HC02193[e]	Exchange of Glycolithocholate	HC02193[e] <=>	Exchange/demand reaction
EX_HC02192[e]	Exchange of Taurolithocholate	HC02192[e] <=>	Exchange/demand reaction
EX_dgchol[e]	Exchange of Chenodeoxyglycocholate	dgchol[e] <=>	Exchange/demand reaction
EX_C02528[e]	Exchange of Chenodeoxycholate	C02528[e] <=>	Exchange/demand reaction
EX_tdchola[e]	Exchange of Taurochenodeoxycholate	tdchola[e] <=>	Exchange/demand reaction
EX_HC02196[e]	Exchange of Glycoursodeoxycholate	HC02196[e] <=>	Exchange/demand reaction
EX_HC02194[e]	Ursodeoxycholic acid exchange	HC02194[e] <=>	Exchange/demand reaction
EX_HC02195[e]	Exchange of Tauroursodeoxycholate	HC02195[e] <=>	Exchange/demand reaction
EX_h[e]	EX_h[e]	h[e] <=>	Exchange/demand reaction
EX_hco3[e]	EX_hco3[e]	hco3[e] <=>	Exchange/demand reaction
EX_na1[e]	EX_na1[e]	na1[e] <=>	Exchange/demand reaction
EX_34dhphe[e]	EX_34dhphe[e]	34dhphe[e] <=>	Exchange/demand reaction
EX_h2o[e]	EX_h2o[e]	h2o[e] <=>	Exchange/demand reaction
EX_adn[e]	EX_adn[e]	adn[e] <=>	Exchange/demand reaction
EX_ins[e]	EX_ins[e]	ins[e] <=>	Exchange/demand reaction
EX_ala_L[e]	EX_ala_L[e]	ala_L[e] <=>	Exchange/demand reaction
EX_asn_L[e]	EX_asn_L[e]	asn_L[e] <=>	Exchange/demand reaction
EX_cys_L[e]	EX_cys_L[e]	cys_L[e] <=>	Exchange/demand reaction
EX_ala_D[e]	EX_ala_D[e]	ala_D[e] <=>	Exchange/demand reaction
EX_gln_L[e]	EX_gln_L[e]	gln_L[e] <=>	Exchange/demand reaction
EX_gly[e]	EX_gly[e]	gly[e] <=>	Exchange/demand reaction
EX_ser_L[e]	EX_ser_L[e]	ser_L[e] <=>	Exchange/demand reaction
EX_thr_L[e]	EX_thr_L[e]	thr_L[e] <=>	Exchange/demand reaction
EX_arach[e]	EX_arach[e]	arach[e] <=>	Exchange/demand reaction
EX_lys_L[e]	EX_lys_L[e]	lys_L[e] <=>	Exchange/demand reaction
EX_arg_L[e]	EX_arg_L[e]	arg_L[e] <=>	Exchange/demand reaction
EX_ascb_L[e]	EX_ascb_L[e]	ascb_L[e] <=>	Exchange/demand reaction
EX_asp_D[e]	EX_asp_D[e]	asp_D[e] <=>	Exchange/demand reaction
EX_k[e]	EX_k[e]	k[e] <=>	Exchange/demand reaction
EX_asp_L[e]	EX_asp_L[e]	asp_L[e] <=>	Exchange/demand reaction
EX_ala_B[e]	EX_ala_B[e]	ala_B[e] <=>	Exchange/demand reaction
EX_bildglcur[e]	EX_bildglcur[e]	bildglcur[e] <=>	Exchange/demand reaction
EX_btn[e]	EX_btn[e]	btn[e] <=>	Exchange/demand reaction
EX_cl[e]	EX_cl[e]	cl[e] <=>	Exchange/demand reaction
EX_co[e]	EX_co[e]	co[e] <=>	Exchange/demand reaction
EX_crn[e]	EX_crn[e]	crn[e] <=>	Exchange/demand reaction
EX_glu_L[e]	EX_glu_L[e]	glu_L[e] <=>	Exchange/demand reaction
EX_Lcystin[e]	EX_Lcystin[e]	Lcystin[e] <=>	Exchange/demand reaction
EX_cytd[e]	EX_cytd[e]	cytd[e] <=>	Exchange/demand reaction
EX_dad_2[e]	EX_dad_2[e]	dad_2[e] <=>	Exchange/demand reaction
EX_din[e]	EX_din[e]	din[e] <=>	Exchange/demand reaction
EX_dcyt[e]	EX_dcyt[e]	dcyt[e] <=>	Exchange/demand reaction
EX_dgsn[e]	EX_dgsn[e]	dgsn[e] <=>	Exchange/demand reaction
EX_dhdascb[e]	EX_dhdascb[e]	dhdascb[e] <=>	Exchange/demand reaction
EX_duri[e]	EX_duri[e]	duri[e] <=>	Exchange/demand reaction
EX_avite1[e]	EX_avite1[e]	avite1[e] <=>	Exchange/demand reaction
EX_gsn[e]	EX_gsn[e]	gsn[e] <=>	Exchange/demand reaction
EX_hdca[e]	EX_hdca[e]	hdca[e] <=>	Exchange/demand reaction
EX_hdcea[e]	EX_hdcea[e]	hdcea[e] <=>	Exchange/demand reaction
EX_lnlc[e]	EX_lnlc[e]	lnlc[e] <=>	Exchange/demand reaction
EX_lnlnca[e]	EX_lnlnca[e]	lnlnca[e] <=>	Exchange/demand reaction
EX_lnlncg[e]	EX_lnlncg[e]	lnlncg[e] <=>	Exchange/demand reaction
EX_lpchol_hs[e]	EX_lpchol_hs[e]	lpchol_hs[e] <=>	Exchange/demand reaction
EX_ocdca[e]	EX_ocdca[e]	ocdca[e] <=>	Exchange/demand reaction
EX_ocdcea[e]	EX_ocdcea[e]	ocdcea[e] <=>	Exchange/demand reaction
EX_octa[e]	EX_octa[e]	octa[e] <=>	Exchange/demand reaction
EX_pchol_hs[e]	EX_pchol_hs[e]	pchol_hs[e] <=>	Exchange/demand reaction
EX_phyQ[e]	EX_phyQ[e]	phyQ[e] <=>	Exchange/demand reaction
EX_pro_D[e]	EX_pro_D[e]	pro_D[e] <=>	Exchange/demand reaction
EX_retn[e]	EX_retn[e]	retn[e] <=>	Exchange/demand reaction
EX_Rtotal[e]	EX_Rtotal[e]	Rtotal[e] <=>	Exchange/demand reaction
EX_Rtotal2[e]	EX_Rtotal2[e]	Rtotal2[e] <=>	Exchange/demand reaction
EX_ser_D[e]	EX_ser_D[e]	ser_D[e] <=>	Exchange/demand reaction
EX_ttdca[e]	EX_ttdca[e]	ttdca[e] <=>	Exchange/demand reaction
EX_urate[e]	EX_urate[e]	urate[e] <=>	Exchange/demand reaction
EX_xolest2_hs[e]	EX_xolest2_hs[e]	xolest2_hs[e] <=>	Exchange/demand reaction
EX_xylt[e]	EX_xylt[e]	xylt[e] <=>	Exchange/demand reaction
EX_fe2[e]	EX_fe2[e]	fe2[e] <=>	Exchange/demand reaction
EX_fe3[e]	EX_fe3[e]	fe3[e] <=>	Exchange/demand reaction
EX_fru[e]	EX_fru[e]	fru[e] <=>	Exchange/demand reaction
EX_gal[e]	EX_gal[e]	gal[e] <=>	Exchange/demand reaction
EX_gam[e]	EX_gam[e]	gam[e] <=>	Exchange/demand reaction
EX_his_L[e]	EX_his_L[e]	his_L[e] <=>	Exchange/demand reaction
EX_ile_L[e]	EX_ile_L[e]	ile_L[e] <=>	Exchange/demand reaction
EX_leu_L[e]	EX_leu_L[e]	leu_L[e] <=>	Exchange/demand reaction
EX_man[e]	EX_man[e]	man[e] <=>	Exchange/demand reaction
EX_met_L[e]	EX_met_L[e]	met_L[e] <=>	Exchange/demand reaction
EX_uri[e]	EX_uri[e]	uri[e] <=>	Exchange/demand reaction
EX_orn[e]	EX_orn[e]	orn[e] <=>	Exchange/demand reaction
EX_phe_L[e]	EX_phe_L[e]	phe_L[e] <=>	Exchange/demand reaction
EX_pnto_R[e]	EX_pnto_R[e]	pnto_R[e] <=>	Exchange/demand reaction
EX_pro_L[e]	EX_pro_L[e]	pro_L[e] <=>	Exchange/demand reaction
EX_ribflv[e]	EX_ribflv[e]	ribflv[e] <=>	Exchange/demand reaction
EX_rib_D[e]	EX_rib_D[e]	rib_D[e] <=>	Exchange/demand reaction
EX_o2[e]	EX_o2[e]	o2[e] <=>	Exchange/demand reaction
EX_thymd[e]	EX_thymd[e]	thymd[e] <=>	Exchange/demand reaction
EX_trp_L[e]	EX_trp_L[e]	trp_L[e] <=>	Exchange/demand reaction
EX_tyr_L[e]	EX_tyr_L[e]	tyr_L[e] <=>	Exchange/demand reaction
EX_urea[e]	EX_urea[e]	urea[e] <=>	Exchange/demand reaction
EX_val_L[e]	EX_val_L[e]	val_L[e] <=>	Exchange/demand reaction
EX_ptrc[e]	EX_ptrc[e]	ptrc[e] <=>	Exchange/demand reaction
EX_co2[e]	EX_co2[e]	co2[e] <=>	Exchange/demand reaction
EX_spmd[e]	EX_spmd[e]	spmd[e] <=>	Exchange/demand reaction
EX_lac_L[e]	EX_lac_L[e]	lac_L[e] <=>	Exchange/demand reaction
EX_sprm[e]	EX_sprm[e]	sprm[e] <=>	Exchange/demand reaction
EX_c8crn[e]	EX_c8crn[e]	c8crn[e] <=>	Exchange/demand reaction
EX_4hpro_LT[e]	EX_4hpro_LT[e]	4hpro_LT[e] <=>	Exchange/demand reaction
EX_alaala[e]	EX_alaala[e]	alaala[e] <=>	Exchange/demand reaction
EX_bglc[e]	EX_bglc[e]	bglc[e] <=>	Exchange/demand reaction
EX_carn[e]	EX_carn[e]	carn[e] <=>	Exchange/demand reaction
EX_glygly[e]	EX_glygly[e]	glygly[e] <=>	Exchange/demand reaction
EX_glyphe[e]	EX_glyphe[e]	glyphe[e] <=>	Exchange/demand reaction
EX_glypro[e]	EX_glypro[e]	glypro[e] <=>	Exchange/demand reaction
EX_glysar[e]	EX_glysar[e]	glysar[e] <=>	Exchange/demand reaction
EX_gum[e]	EX_gum[e]	gum[e] <=>	Exchange/demand reaction
EX_gumdchac[e]	EX_gumdchac[e]	gumdchac[e] <=>	Exchange/demand reaction
EX_gumgchol[e]	EX_gumgchol[e]	gumgchol[e] <=>	Exchange/demand reaction
EX_gumtchol[e]	EX_gumtchol[e]	gumtchol[e] <=>	Exchange/demand reaction
EX_leugly[e]	EX_leugly[e]	leugly[e] <=>	Exchange/demand reaction
EX_leuleu[e]	EX_leuleu[e]	leuleu[e] <=>	Exchange/demand reaction
EX_pect[e]	EX_pect[e]	pect[e] <=>	Exchange/demand reaction
EX_pectindchac[e]	EX_pectindchac[e]	pectindchac[e] <=>	Exchange/demand reaction
EX_pectingchol[e]	EX_pectingchol[e]	pectingchol[e] <=>	Exchange/demand reaction
EX_pectintchol[e]	EX_pectintchol[e]	pectintchol[e] <=>	Exchange/demand reaction
EX_progly[e]	EX_progly[e]	progly[e] <=>	Exchange/demand reaction
EX_psyl[e]	EX_psyl[e]	psyl[e] <=>	Exchange/demand reaction
EX_psylchol[e]	EX_psylchol[e]	psylchol[e] <=>	Exchange/demand reaction
EX_psyltchol[e]	EX_psyltchol[e]	psyltchol[e] <=>	Exchange/demand reaction
EX_psyltdechol[e]	EX_psyltdechol[e]	psyltdechol[e] <=>	Exchange/demand reaction
EX_thm[e]	EX_thm[e]	thm[e] <=>	Exchange/demand reaction
EX_slfcys[e]	EX_slfcys[e]	slfcys[e] <=>	Exchange/demand reaction
EX_q10h2[e]	EX_q10h2[e]	q10h2[e] <=>	Exchange/demand reaction
EX_pheme[e]	EX_pheme[e]	pheme[e] <=>	Exchange/demand reaction
EX_glyleu[e]	EX_glyleu[e]	glyleu[e] <=>	Exchange/demand reaction
EX_pydxn[e]	EX_pydxn[e]	pydxn[e] <=>	Exchange/demand reaction
EX_pydx[e]	EX_pydx[e]	pydx[e] <=>	Exchange/demand reaction
EX_pydam[e]	EX_pydam[e]	pydam[e] <=>	Exchange/demand reaction
EX_ca24g[e]	EX_ca24g[e]	ca24g[e] <=>	Exchange/demand reaction
EX_ca3s[e]	EX_ca3s[e]	ca3s[e] <=>	Exchange/demand reaction
EX_coprost[e]	EX_coprost[e]	coprost[e] <=>	Exchange/demand reaction
C160CPT1	Production of Palmitoylcarnitine	crn[c] + pmtcoa[c] <=> coa[c] + pmtcrn[c]	Fatty acid oxidation
C161CPT1	Production of Palmitoleoylcarnitine	crn[c] + hdcoa[c] <=> coa[c] + hdcecrn[c]	Fatty acid oxidation
C161CPT2	Transport of Hexadecenoyl Coenzyme A into Mitochondrial Matrix	coa[m] + hdcecrn[m] <=> crn[m] + hdcoa[m]	Fatty acid oxidation
C180CPT1	Production of Stearoylcarnitine	crn[c] + stcoa[c] <=> coa[c] + stcrn[c]	Fatty acid oxidation
C181CPT1	Transport of Octadecenoyl Coenzyme A into Mitochondrial Matrix	crn[c] + odecoa[c] <=> coa[c] + odecrn[c]	Fatty acid oxidation
C181CPT2	Transport of Octadecenoyl Coenzyme A into Mitochondrial Matrix	coa[m] + odecrn[m] <=> crn[m] + odecoa[m]	Fatty acid oxidation
CSNAT2m	Carnitine O-Aceyltransferase, Mitochondrial	coa[m] + pcrn[m] <=> ppcoa[m] + crn[m]	Fatty acid oxidation
CSNATm	Carnitine O-Aceyltransferase, Mitochondrial	coa[m] + acrn[m] <=> accoa[m] + crn[m]	Fatty acid oxidation
FACOAL181i	C181 Fatty Acid Activation	atp[c] + coa[c] + ocdcea[c] -> amp[c] + ppi[c] + odecoa[c]	Fatty acid oxidation
FACOAL1821	Fatty-Acid- Coenzyme A Ligase	atp[c] + coa[c] + lnlc[c] -> amp[c] + ppi[c] + lnlccoa[c]	Fatty acid oxidation
FACOAL1831	Fatty-Acid- Coenzyme A Ligase	atp[c] + coa[c] + lnlncg[c] -> amp[c] + ppi[c] + lnlncgcoa[c]	Fatty acid oxidation
FACOAL1832	Fatty-Acid- Coenzyme A Ligase	atp[c] + coa[c] + lnlnca[c] -> amp[c] + ppi[c] + lnlncacoa[c]	Fatty acid oxidation
FACOAL204	Fatty-Acid- Coenzyme A Ligase	atp[c] + coa[c] + arachd[c] -> amp[c] + ppi[c] + arachdcoa[c]	Fatty acid oxidation
FACOAL205	Fatty-Acid- Coenzyme A Ligase	atp[c] + coa[c] + tmndnc[c] -> amp[c] + ppi[c] + tmndnccoa[c]	Fatty acid oxidation
FACOAL80i	Fatty-Acid- Coenzyme A Ligase (Octanoate)	atp[c] + coa[c] + octa[c] -> amp[c] + ppi[c] + occoa[c]	Fatty acid oxidation
FAOXC180	Beta Oxidation of Long Chain Fatty Acid	h2o[m] + nad[m] + coa[m] + fad[m] + stcoa[m] -> h[m] + nadh[m] + accoa[m] + fadh2[m] + pmtcoa[m]	Fatty acid oxidation
FAOXC180x	Beta Oxidation of Long Chain Fatty Acid	nad[x] + coa[x] + o2[x] + h2o[x] + stcoa[x] -> h[x] + nadh[x] + accoa[x] + pmtcoa[x] + h2o2[x]	Fatty acid oxidation
FAOXC1811603m	Beta Oxidation Fatty Acid	5 h2o[m] + 5 nad[m] + 5 coa[m] + 4 fad[m] + odecoa[m] -> 5 h[m] + 5 nadh[m] + 5 accoa[m] + 4 fadh2[m] + occoa[m]	Fatty acid oxidation
FAOXC182806m	Beta Oxidation of Fatty Acid	5 h2o[m] + 5 nad[m] + 5 coa[m] + 3 fad[m] + lnlccoa[m] -> 5 h[m] + 5 nadh[m] + 5 accoa[m] + 3 fadh2[m] + occoa[m]	Fatty acid oxidation
FAOXC200180m	Beta Oxidation of Long Chain Fatty Acid	h2o[m] + nad[m] + coa[m] + fad[m] + arachcoa[m] -> h[m] + nadh[m] + accoa[m] + fadh2[m] + stcoa[m]	Fatty acid oxidation
FAOXC204	Beta Oxidation of Long Chain Fatty Acid	9 h2o[m] + 9 nad[m] + 9 coa[m] + 5 fad[m] + arachdcoa[m] -> 9 h[m] + 9 nadh[m] + 10 accoa[m] + 5 fadh2[m]	Fatty acid oxidation
FAOXC2051843m	Beta Oxidation of Fatty Acid	h2o[m] + nad[m] + coa[m] + tmndnccoa[m] -> h[m] + nadh[m] + accoa[m] + strdnccoa[m]	Fatty acid oxidation
FAOXC2051843x	Beta Oxidation of Long Chain Fatty Acid	nad[x] + coa[x] + h2o[x] + tmndnccoa[x] -> h[x] + nadh[x] + accoa[x] + strdnccoa[x]	Fatty acid oxidation
LCAT1e	Lecithin-Cholesterol Acyltransferase	chsterol[e] + pchol_hs[e] -> lpchol_hs[e] + xolest2_hs[e]	Fatty acid oxidation
C30CPT1	Production of Propionylcarnitine	ppcoa[c] + crn[c] <=> coa[c] + pcrn[c]	Fatty acid oxidation
C4CRNCPT2	Transport of Butyryl Carnitine in the Mitochondrial Matrix for Final Hydrolysis	coa[m] + c4crn[m] <=> btcoa[m] + crn[m]	Fatty acid oxidation
C80CPT1	Production of Octanoylcarnitine	crn[c] + occoa[c] <=> coa[c] + c8crn[c]	Fatty acid oxidation
C8CRNe	Transport of Octanoyl Carnitine into the Extra Cellular Space	c8crn[c] -> c8crn[e]	Fatty acid oxidation
FAOXC101C102m	Fatty Acid Beta Oxidation (C10:1->C10:2), Mitochondrial	fad[m] + dece4coa[m] -> fadh2[m] + dec24dicoa[m]	Fatty acid oxidation
FAOXC101C8m	Fatty Acid Beta Oxidation (C10:1->C8), Mitochondrial	h2o[m] + nad[m] + coa[m] + dc2coa[m] -> h[m] + nadh[m] + accoa[m] + occoa[m]	Fatty acid oxidation
FAOXC102C101m	Reduction (C10:2->C10:1), Mitochondrial	h[m] + nadph[m] + dec24dicoa[m] -> nadp[m] + dece3coa[m]	Fatty acid oxidation
FAOXC102C103m	Fatty Acid Beta Oxidation (C10:2->C10:3), Mitochondrial	fad[m] + dec47dicoa[m] -> fadh2[m] + dectricoa[m]	Fatty acid oxidation
FAOXC102C103x	Fatty Acid Beta Oxidation (C10:2->C10:3), Peroxisomal	o2[x] + dec47dicoa[x] -> h2o2[x] + dectricoa[x]	Fatty acid oxidation
FAOXC102C81m	Fatty Acid Beta Oxidation (C10:2->C8:1), Mitochondrial	h2o[m] + nad[m] + coa[m] + 2decdicoa[m] -> h[m] + nadh[m] + accoa[m] + octe5coa[m]	Fatty acid oxidation
FAOXC102C81x	Fatty Acid Beta Oxidation (C10:2->C8:1), Peroxisomal	nad[x] + coa[x] + h2o[x] + 2decdicoa[x] -> h[x] + nadh[x] + accoa[x] + octe5coa[x]	Fatty acid oxidation
FAOXC102m	Isomerization (C10:2), Mitochondrial	3decdicoa[m] -> 2decdicoa[m]	Fatty acid oxidation
FAOXC102x	Isomerization (C10:2), Peroxisomal	3decdicoa[x] -> 2decdicoa[x]	Fatty acid oxidation
FAOXC103C102m	Fatty Acid Beta Oxidation (C10:3->C10:2), Mitochondrial	h[m] + nadph[m] + dectricoa[m] -> nadp[m] + 3decdicoa[m]	Fatty acid oxidation
FAOXC103C102x	Fatty Acid Beta Oxidation (C10:3->C10:2), Peroxisomal	h[x] + nadph[x] + dectricoa[x] -> nadp[x] + 3decdicoa[x]	Fatty acid oxidation
FAOXC10C8m	Fatty Acid Beta Oxidation (C10->C8), Mitochondrial	h2o[m] + nad[m] + coa[m] + fad[m] + dcacoa[m] -> h[m] + nadh[m] + accoa[m] + fadh2[m] + occoa[m]	Fatty acid oxidation
FAOXC10C8x	Fatty Acid Beta Oxidation (C10->C8), Peroxisomal	nad[x] + coa[x] + dcacoa[x] + o2[x] + h2o[x] -> h[x] + nadh[x] + accoa[x] + occoa[x] + h2o2[x]	Fatty acid oxidation
FAOXC121C101m	Fatty Acid Beta Oxidation (C12:1->C10:1), Mitochondrial	h2o[m] + nad[m] + coa[m] + fad[m] + dd5ecoa[m] -> h[m] + nadh[m] + accoa[m] + fadh2[m] + dece3coa[m]	Fatty acid oxidation
FAOXC122C101m	Fatty Acid Beta Oxidation (C12:2->C10:1), Mitochondrial	h2o[m] + nad[m] + coa[m] + 2ddecdicoa[m] -> h[m] + nadh[m] + accoa[m] + dece4coa[m]	Fatty acid oxidation
FAOXC122m	Isomerization (C12:2), Mitochondrial	3ddecdicoa[m] -> 2ddecdicoa[m]	Fatty acid oxidation
FAOXC123C102m	Fatty Acid Beta Oxidation (C12:3->C10:2), Mitochondrial	h2o[m] + nad[m] + coa[m] + 2dodtricoa[m] -> h[m] + nadh[m] + accoa[m] + dec47dicoa[m]	Fatty acid oxidation
FAOXC123C102x	Fatty Acid Beta Oxidation (C12:3->C10:2), Peroxisomal	nad[x] + coa[x] + h2o[x] + 2dodtricoa[x] -> h[x] + nadh[x] + accoa[x] + dec47dicoa[x]	Fatty acid oxidation
FAOXC123m	Isomerization (C12:3), Mitochondrial	3dodtricoa[m] -> 2dodtricoa[m]	Fatty acid oxidation
FAOXC123x	Isomerization (C12:3), Peroxisomal	3dodtricoa[x] -> 2dodtricoa[x]	Fatty acid oxidation
FAOXC12C10m	Fatty Acid Beta Oxidation (C12->C10), Mitochondrial	h2o[m] + nad[m] + coa[m] + fad[m] + ddcacoa[m] -> h[m] + nadh[m] + accoa[m] + fadh2[m] + dcacoa[m]	Fatty acid oxidation
FAOXC12C10x	Fatty Acid Beta Oxidation (C12->C10), Peroxisomal	nad[x] + coa[x] + ddcacoa[x] + o2[x] + h2o[x] -> h[x] + nadh[x] + accoa[x] + dcacoa[x] + h2o2[x]	Fatty acid oxidation
FAOXC141C121m	Fatty Acid Beta Oxidation (C14:1->C12:1), Mitochondrial	h2o[m] + nad[m] + coa[m] + fad[m] + tetd7ecoa[m] -> h[m] + nadh[m] + accoa[m] + fadh2[m] + dd5ecoa[m]	Fatty acid oxidation
FAOXC142C122m	Fatty Acid Beta Oxidation (C14:2->C12:2), Mitochondrial	h2o[m] + nad[m] + coa[m] + fad[m] + tetdecdicoa[m] -> h[m] + nadh[m] + accoa[m] + fadh2[m] + 3ddecdicoa[m]	Fatty acid oxidation
FAOXC143C123m	Fatty Acid Beta Oxidation (C14:3->C12:3), Mitochondrial	h2o[m] + nad[m] + coa[m] + fad[m] + 5tedtricoa[m] -> h[m] + nadh[m] + accoa[m] + fadh2[m] + 3dodtricoa[m]	Fatty acid oxidation
FAOXC143C123x	Fatty Acid Beta Oxidation (C14:3->C12:3), Peroxisomal	nad[x] + coa[x] + o2[x] + h2o[x] + 5tedtricoa[x] -> h[x] + nadh[x] + accoa[x] + h2o2[x] + 3dodtricoa[x]	Fatty acid oxidation
FAOXC14C12m	Fatty Acid Beta Oxidation (C14->C12), Mitochondrial	h2o[m] + nad[m] + coa[m] + fad[m] + tdcoa[m] -> h[m] + nadh[m] + accoa[m] + fadh2[m] + ddcacoa[m]	Fatty acid oxidation
FAOXC14C12x	Fatty Acid Beta Oxidation (C14->C12), Peroxisomal	nad[x] + coa[x] + tdcoa[x] + o2[x] + h2o[x] -> h[x] + nadh[x] + accoa[x] + ddcacoa[x] + h2o2[x]	Fatty acid oxidation
FAOXC161C141m	Fatty Acid Beta Oxidation (C16:1->C14:1), Mitochondrial	h2o[m] + nad[m] + coa[m] + fad[m] + hdcoa[m] -> h[m] + nadh[m] + accoa[m] + fadh2[m] + tetd7ecoa[m]	Fatty acid oxidation
FAOXC162C142m	Fatty Acid Beta Oxidation (C16:2->C14:2), Mitochondrial	h2o[m] + nad[m] + coa[m] + fad[m] + hexddcoa[m] -> h[m] + nadh[m] + accoa[m] + fadh2[m] + tetdecdicoa[m]	Fatty acid oxidation
FAOXC163C143m	Fatty Acid Beta Oxidation (C16:3->C14:3), Mitochondrial	h2o[m] + nad[m] + coa[m] + fad[m] + hexdtrcoa[m] -> h[m] + nadh[m] + accoa[m] + fadh2[m] + 5tedtricoa[m]	Fatty acid oxidation
FAOXC163C164Gm	Fatty Acid Beta Oxidation (C16:3->C16:4), Mitochondrial	fad[m] + 4hexdtricoa[m] -> fadh2[m] + hexdectecoa[m]	Fatty acid oxidation
FAOXC163GC142m	Fatty Acid Beta Oxidation (C16:3->C14:2), Mitochondrial	h2o[m] + nad[m] + coa[m] + 2hexdtricoa[m] -> h[m] + nadh[m] + accoa[m] + tetdecdicoa[m]	Fatty acid oxidation
FAOXC163Gm	Isomerization (C16:3), Mitochondrial	3hexdtricoa[m] -> 2hexdtricoa[m]	Fatty acid oxidation
FAOXC164C143m	Fatty Acid Beta Oxidation (C16:4->C14:3), Mitochondrial	h2o[m] + nad[m] + coa[m] + 2hexdtetcoa[m] -> h[m] + nadh[m] + accoa[m] + 5tedtricoa[m]	Fatty acid oxidation
FAOXC164C143x	Fatty Acid Beta Oxidation (C16:4->C14:3), Peroxisomal	nad[x] + coa[x] + h2o[x] + 2hexdtetcoa[x] -> h[x] + nadh[x] + accoa[x] + 5tedtricoa[x]	Fatty acid oxidation
FAOXC164C165m	Fatty Acid Beta Oxidation (C16:4->C16:5), Mitochondrial	fad[m] + 4hexdtetcoa[m] -> fadh2[m] + hexdpencoa[m]	Fatty acid oxidation
FAOXC164C165x	Fatty Acid Beta Oxidation (C16:4->C16:5), Peroxisomal	o2[x] + 4hexdtetcoa[x] -> h2o2[x] + hexdpencoa[x]	Fatty acid oxidation
FAOXC164GC163m	Fatty Acid Beta Oxidation (C16:4->C16:3), Mitochondrial	h[m] + nadph[m] + hexdectecoa[m] -> nadp[m] + 3hexdtricoa[m]	Fatty acid oxidation
FAOXC164m	Isomerization (C16:4), Mitochondrial	3hexdtetcoa[m] -> 2hexdtetcoa[m]	Fatty acid oxidation
FAOXC164x	Isomerization (C16:4), Peroxisomal	3hexdtetcoa[x] -> 2hexdtetcoa[x]	Fatty acid oxidation
FAOXC165C164m	Fatty Acid Beta Oxidation (C16:5->C16:4), Mitochondrial	h[m] + nadph[m] + hexdpencoa[m] -> nadp[m] + 3hexdtetcoa[m]	Fatty acid oxidation
FAOXC165C164x	Fatty Acid Beta Oxidation (C16:5->C16:4), Peroxisomal	h[x] + nadph[x] + hexdpencoa[x] -> nadp[x] + 3hexdtetcoa[x]	Fatty acid oxidation
FAOXC16C14m	Fatty Acid Beta Oxidation (C16->C14), Mitochondrial	h2o[m] + nad[m] + coa[m] + fad[m] + pmtcoa[m] -> h[m] + nadh[m] + accoa[m] + fadh2[m] + tdcoa[m]	Fatty acid oxidation
FAOXC16C14x	Fatty Acid Beta Oxidation (C16->C14), Peroxisomal	nad[x] + coa[x] + pmtcoa[x] + o2[x] + h2o[x] -> h[x] + nadh[x] + accoa[x] + tdcoa[x] + h2o2[x]	Fatty acid oxidation
FAOXC182C162m	Fatty Acid Beta Oxidation (C18:2->C16:2), Mitochondrial	h2o[m] + nad[m] + coa[m] + fad[m] + lnlccoa[m] -> h[m] + nadh[m] + accoa[m] + fadh2[m] + hexddcoa[m]	Fatty acid oxidation
FAOXC183C163Gm	Fatty Acid Beta Oxidation (C18:3->C16:3), Mitochondrial	h2o[m] + nad[m] + coa[m] + fad[m] + lnlncgcoa[m] -> h[m] + nadh[m] + accoa[m] + fadh2[m] + 4hexdtricoa[m]	Fatty acid oxidation
FAOXC183C163m	Fatty Acid Beta Oxidation (C18:3->C16:3), Mitochondrial	h2o[m] + nad[m] + coa[m] + fad[m] + lnlncacoa[m] -> h[m] + nadh[m] + accoa[m] + fadh2[m] + hexdtrcoa[m]	Fatty acid oxidation
FAOXC184C164m	Fatty Acid Beta Oxidation (C18:4->C16:4), Mitochondrial	h2o[m] + nad[m] + coa[m] + fad[m] + strdnccoa[m] -> h[m] + nadh[m] + accoa[m] + fadh2[m] + 4hexdtetcoa[m]	Fatty acid oxidation
FAOXC184C164x	Fatty Acid Beta Oxidation (C18:4->C16:4), Peroxisomal	nad[x] + coa[x] + o2[x] + h2o[x] + strdnccoa[x] -> h[x] + nadh[x] + accoa[x] + h2o2[x] + 4hexdtetcoa[x]	Fatty acid oxidation
FAOXC4C2m	Fatty Acid Beta Oxidation (C4->C2), Mitochondrial	h2o[m] + nad[m] + coa[m] + fad[m] + btcoa[m] -> h[m] + nadh[m] + 2 accoa[m] + fadh2[m]	Fatty acid oxidation
FAOXC61C4m	Fatty Acid Beta Oxidation (C6:1->C4:0), Mitochondrial	h2o[m] + nad[m] + coa[m] + hx2coa[m] -> h[m] + nadh[m] + accoa[m] + btcoa[m]	Fatty acid oxidation
FAOXC61C4x	Fatty Acid Beta Oxidation (C6:1->C4:0), Peroxisomal	nad[x] + coa[x] + h2o[x] + hx2coa[x] -> h[x] + nadh[x] + accoa[x] + btcoa[x]	Fatty acid oxidation
FAOXC61m	Isomerization (C6:1), Mitochondrial	hexe3coa[m] -> hx2coa[m]	Fatty acid oxidation
FAOXC61x	Isomerization (C6:1), Peroxisomal	hexe3coa[x] -> hx2coa[x]	Fatty acid oxidation
FAOXC6C4m	Fatty Acid Beta Oxidation (C6->C4), Mitochondrial	h2o[m] + nad[m] + coa[m] + fad[m] + hxcoa[m] -> h[m] + nadh[m] + accoa[m] + fadh2[m] + btcoa[m]	Fatty acid oxidation
FAOXC6C4x	Fatty Acid Beta Oxidation (C6->C4), Peroxisomal	nad[x] + coa[x] + o2[x] + h2o[x] + hxcoa[x] -> h[x] + nadh[x] + accoa[x] + h2o2[x] + btcoa[x]	Fatty acid oxidation
FAOXC81C61m	Fatty Acid Beta Oxidation (C8:1->C6:1), Mitochondrial	h2o[m] + nad[m] + coa[m] + fad[m] + octe5coa[m] -> h[m] + nadh[m] + accoa[m] + fadh2[m] + hexe3coa[m]	Fatty acid oxidation
FAOXC81C61x	Fatty Acid Beta Oxidation (C8:1->C6:1), Peroxisomal	nad[x] + coa[x] + o2[x] + h2o[x] + octe5coa[x] -> h[x] + nadh[x] + accoa[x] + h2o2[x] + hexe3coa[x]	Fatty acid oxidation
FAOXC8C6m	Fatty Acid Beta Oxidation (C8->C6), Mitochondrial	h2o[m] + nad[m] + coa[m] + fad[m] + occoa[m] -> h[m] + nadh[m] + accoa[m] + fadh2[m] + hxcoa[m]	Fatty acid oxidation
FAOXC8C6x	Fatty Acid Beta Oxidation (C8->C6), Peroxisomal	nad[x] + coa[x] + occoa[x] + o2[x] + h2o[x] -> h[x] + nadh[x] + accoa[x] + h2o2[x] + hxcoa[x]	Fatty acid oxidation
FACOAL161	Fatty-Acid- Coenzyme A Ligase (Hexadecenoate)	atp[c] + coa[c] + hdcea[c] -> amp[c] + ppi[c] + hdcoa[c]	Fatty acid oxidation
FOLR2	Folate Reductase	nadph[c] + fol[c] -> nadp[c] + dhf[c]	Folate metabolism
FTHFDH	Formyltetrahydrofolate Dehydrogenase	10fthf[c] + h2o[c] + nadp[c] -> h[c] + nadph[c] + co2[c] + thf[c]	Folate metabolism
MTHFR3	5, 10-Methylenetetrahydrofolatereductase (NADPH)	2 h[c] + nadph[c] + mlthf[c] -> nadp[c] + 5mthf[c]	Folate metabolism
DHFR	Dihydrofolate Reductase	h[c] + nadph[c] + dhf[c] <=> nadp[c] + thf[c]	Folate metabolism
MTHFC	Methenyltetrahydrofolate Cyclohydrolase	h2o[c] + methf[c] <=> 10fthf[c] + h[c]	Folate metabolism
MTHFD	Methylenetetrahydrofolate Dehydrogenase (NADP)	nadp[c] + mlthf[c] <=> nadph[c] + methf[c]	Folate metabolism
FTHFL	Formate-Tetrahydrofolate Ligase	atp[c] + for[c] + thf[c] -> 10fthf[c] + adp[c] + pi[c]	Folate metabolism
KHK	Ketohexokinase	atp[c] + fru[c] -> h[c] + adp[c] + f1p[c]	Fructose and mannose metabolism
TRIOK	Triokinase	atp[c] + glyald[c] -> h[c] + adp[c] + g3p[c]	Fructose and mannose metabolism
FBA2	D-Fructose 1-Phosphate D-Glyceraldehyde-3-Phosphate-Lyase	f1p[c] <=> dhap[c] + glyald[c]	Fructose and mannose metabolism
GALU	UTP-Glucose-1-Phosphate Uridylyltransferase	h[c] + g1p[c] + utp[c] <=> ppi[c] + udpg[c]	Galactose metabolism
ABTArm	4-Aminobutyrate Transaminase, Reversible, Mitochondrial	akg[m] + 4abut[m] <=> glu_L[m] + sucsal[m]	Glutamate metabolism
ALATA_L	L-Alanine Transaminase	akg[c] + ala_L[c] <=> pyr[c] + glu_L[c]	Glutamate metabolism
CBPSam	Carbamoyl-Phosphate Synthase (Ammonia), Mitochondrial	2 atp[m] + hco3[m] + nh4[m] -> 2 h[m] + 2 adp[m] + pi[m] + cbp[m]	Glutamate metabolism
GLUNm	Glutaminase, Mitochondrial	h2o[m] + gln_L[m] -> glu_L[m] + nh4[m]	Glutamate metabolism
GTHO	Glutathione Oxidoreductase	h[c] + nadph[c] + gthox[c] -> nadp[c] + 2 gthrd[c]	Glutamate metabolism
GLNS	Glutamine Synthetase	nh4[c] + atp[c] + glu_L[c] -> h[c] + adp[c] + pi[c] + gln_L[c]	Glutamate metabolism
GLUCYS	Gamma-Glutamylcysteine Synthetase	atp[c] + glu_L[c] + cys_L[c] -> h[c] + adp[c] + pi[c] + glucys[c]	Glutathione metabolism
GTHP	Glutathione Peroxidase	h2o2[c] + 2 gthrd[c] -> 2 h2o[c] + gthox[c]	Glutathione metabolism
GTHS	Glutathione Synthetase	atp[c] + gly[c] + glucys[c] -> h[c] + adp[c] + pi[c] + gthrd[c]	Glutathione metabolism
CEPTC	Choline Phosphotransferase	cdpchol[c] + dag_hs[c] -> h[c] + cmp[c] + pchol_hs[c]	Glycerophospholipid metabolism
CEPTE	Ethanolamine Phosphotransferase	cdpea[c] + dag_hs[c] -> h[c] + cmp[c] + pe_hs[c]	Glycerophospholipid metabolism
CHLPCTD	Choline Phosphate Cytididyltransferase	h[c] + ctp[c] + cholp[c] -> ppi[c] + cdpchol[c]	Glycerophospholipid metabolism
CHOLK	Choline Kinase	atp[c] + chol[c] -> h[c] + adp[c] + cholp[c]	Glycerophospholipid metabolism
ETHAK	Ethanolamine Kinase	atp[c] + etha[c] -> h[c] + adp[c] + ethamp[c]	Glycerophospholipid metabolism
GLYKm	Glycerol Kinase	atp[m] + glyc[m] -> h[m] + adp[m] + glyc3p[m]	Glycerophospholipid metabolism
PETHCT	Phosphoethanolamine Cytidyltransferase	h[c] + ctp[c] + ethamp[c] -> ppi[c] + cdpea[c]	Glycerophospholipid metabolism
PETOHMm_hs	Phosphatidylethanolamine N-Methyltransferase	3 amet[m] + pe_hs[m] -> 3 h[m] + 3 ahcys[m] + pchol_hs[m]	Glycerophospholipid metabolism
PSDm_hs	Phosphatidylserine Decarboxylase	h[m] + ps_hs[m] -> co2[m] + pe_hs[m]	Glycerophospholipid metabolism
PSSA2_hs	Phosphatidylserine Synthase Homo Sapiens	ser_L[c] + pe_hs[c] <=> etha[c] + ps_hs[c]	Glycerophospholipid metabolism
G3PD1	Glycerol-3-Phosphate Dehydrogenase (NAD)	nad[c] + glyc3p[c] <=> h[c] + nadh[c] + dhap[c]	Glycerophospholipid metabolism
GLYK	Glycerol Kinase	atp[c] + glyc[c] -> h[c] + adp[c] + glyc3p[c]	Glycerophospholipid metabolism
ALASm	5-Aminolevulinate Synthase	h[m] + gly[m] + succoa[m] -> coa[m] + co2[m] + 5aop[m]	Glycine, serine, alanine, and threonine metabolism
GHMT2rm	Glycine Hydroxymethyltransferase, Reversible, Mitochondrial	thf[m] + ser_L[m] <=> h2o[m] + gly[m] + mlthf[m]	Glycine, serine, alanine, and threonine metabolism
OBDHc	2-Oxobutanoate Dehydrogenase, Cytosolic	nad[c] + 2obut[c] + coa[c] -> nadh[c] + co2[c] + ppcoa[c]	Glycine, serine, alanine, and threonine metabolism
G6PPer	Glucose-6-Phosphate Phosphatase, Edoplasmic Reticular	h2o[r] + g6p[r] -> glc_D[r] + pi[r]	Glycolysis/gluconeogenesis
PDHm	Pyruvate Dehydrogenase	nad[m] + coa[m] + pyr[m] -> nadh[m] + co2[m] + accoa[m]	Glycolysis/gluconeogenesis
PEPCK	Phosphoenolpyruvate Carboxykinase (GTP)	oaa[c] + gtp[c] -> co2[c] + pep[c] + gdp[c]	Glycolysis/gluconeogenesis
PEPCKm	Phosphoenolpyruvate Carboxykinase (GTP)	gtp[m] + oaa[m] -> co2[m] + gdp[m] + pep[m]	Glycolysis/gluconeogenesis
r0173	(S)-Lactate:NAD+ Oxidoreductase	nad[x] + lac_L[x] <=> h[x] + nadh[x] + pyr[x]	Glycolysis/gluconeogenesis
r0202	Sn-Glycerol-3-Phosphate:NAD+ 2-Oxidoreductase	nad[x] + glyc3p[x] <=> h[x] + nadh[x] + dhap[x]	Glycolysis/gluconeogenesis
ENO	Enolase	2pg[c] <=> h2o[c] + pep[c]	Glycolysis/gluconeogenesis
FBA	Fructose-Bisphosphate Aldolase	fdp[c] <=> dhap[c] + g3p[c]	Glycolysis/gluconeogenesis
FBP	Fructose-Bisphosphatase	h2o[c] + fdp[c] -> pi[c] + f6p[c]	Glycolysis/gluconeogenesis
GAPD	Glyceraldehyde-3-Phosphate Dehydrogenase	pi[c] + nad[c] + g3p[c] <=> h[c] + nadh[c] + 13dpg[c]	Glycolysis/gluconeogenesis
HEX1	Hexokinase (D-Glucose:ATP)	atp[c] + glc_D[c] -> h[c] + adp[c] + g6p[c]	Glycolysis/gluconeogenesis
PGI	Glucose-6-Phosphate Isomerase	g6p[c] <=> f6p[c]	Glycolysis/gluconeogenesis
PGK	Phosphoglycerate Kinase	atp[c] + 3pg[c] <=> adp[c] + 13dpg[c]	Glycolysis/gluconeogenesis
PGM	Phosphoglycerate Mutase	2pg[c] <=> 3pg[c]	Glycolysis/gluconeogenesis
PGMT	Phosphoglucomutase	g1p[c] <=> g6p[c]	Glycolysis/gluconeogenesis
TPI	Triose-Phosphate Isomerase	dhap[c] <=> g3p[c]	Glycolysis/gluconeogenesis
LDH_L	L-Lactate Dehydrogenase	nad[c] + lac_L[c] <=> h[c] + pyr[c] + nadh[c]	Glycolysis/gluconeogenesis
PFK	Phosphofructokinase	atp[c] + f6p[c] -> h[c] + adp[c] + fdp[c]	Glycolysis/gluconeogenesis
PYK	Pyruvate Kinase	h[c] + adp[c] + pep[c] -> atp[c] + pyr[c]	Glycolysis/gluconeogenesis
GluForTx	Glutamate Formimidoyltransferase	h[c] + thf[c] + forglu[c] -> glu_L[c] + 5forthf[c]	Histidine metabolism
HISD	Histidase	his_L[c] -> nh4[c] + urcan[c]	Histidine metabolism
IZPN	Imidazolonepropionase	h2o[c] + 4izp[c] -> h[c] + forglu[c]	Histidine metabolism
URCN	Urocanase	h2o[c] + urcan[c] -> 4izp[c]	Histidine metabolism
3SALATAi	3-Sulfino-Alanine Transaminase (Irreversible)	h[c] + akg[c] + 3sala[c] -> glu_L[c] + 3snpyr[c]	Methionine and cysteine metabolism
3SPYRSP	3-Sulfinopyruvate Hydrolase (Spotaneous Reaction)	h2o[c] + 3snpyr[c] -> h[c] + pyr[c] + so3[c]	Methionine and cysteine metabolism
CYSGLTH	Glutathione:Cystine Oxidoreductase	Lcystin[c] + 2 gthrd[c] <=> 2 cys_L[c] + gthox[c]	Methionine and cysteine metabolism
METAT	Methionine Adenosyltransferase	h2o[c] + atp[c] + met_L[c] -> pi[c] + amet[c] + ppi[c]	Methionine and cysteine metabolism
SFCYSc	Formation of Sulfocysteine	h[c] + so3[c] + cys_L[c] <=> slfcys[c]	Methionine and cysteine metabolism
CYSTGL	Cystathionine G-Lyase	h2o[c] + cyst_L[c] -> nh4[c] + 2obut[c] + cys_L[c]	Methionine and cysteine metabolism
CYSTS	Cystathionine Beta-Synthase	ser_L[c] + hcys_L[c] -> h2o[c] + cyst_L[c]	Methionine and cysteine metabolism
AHC	Adenosylhomocysteinase	h2o[c] + ahcys[c] <=> adn[c] + hcys_L[c]	Methionine and cysteine metabolism
R_group_phosphotase_1	R Group Phosphotase 1	atp[c] + coa[c] + Rtotal[c] -> amp[c] + ppi[c] + Rtotalcoa[c]	Miscellaneous
R_group_phosphotase_2	R Group Phosphotase 2	atp[c] + coa[c] + Rtotal2[c] -> amp[c] + ppi[c] + Rtotal2coa[c]	Miscellaneous
R_group_phosphotase_3	R Group Phosphotase 3	atp[c] + coa[c] + Rtotal3[c] -> amp[c] + ppi[c] + Rtotal3coa[c]	Miscellaneous
CATp	Catalase A, Peroxisomal	2 h2o2[x] -> o2[x] + 2 h2o[x]	Miscellaneous
H2CO3Dm	Carboxylic Acid Dissociation	h2o[m] + co2[m] -> h[m] + hco3[m]	Miscellaneous
TRDR2	Thioredoxin (Ubiquinone 10) Reductase (NADPH)	h[c] + nadph[c] + q10[c] -> nadp[c] + q10h2[c]	Miscellaneous
TRDR3	Thioredoxin (Ubiquinone 10) Reductase (NADH)	h[c] + nadh[c] + q10[c] -> nad[c] + q10h2[c]	Miscellaneous
OAADC	Oxaloacetate Decarboxylase	h[c] + oaa[c] -> pyr[c] + co2[c]	Miscellaneous
NICRNS	Nicotinate D-Ribonucleoside Kinase	atp[c] + nicrns[c] -> h[c] + adp[c] + nicrnt[c]	NAD metabolism
NMNATr	Nicotinamide-Nucleotide Adenylyltransferase	h[c] + atp[c] + nmn[c] <=> nad[c] + ppi[c]	NAD metabolism
NMNS	Nicotinamide Ribotide (NMN) Synthetase	h[c] + ncam[c] + prpp[c] -> ppi[c] + nmn[c]	NAD metabolism
NP1	Nucleotide Phosphatase	h[c] + nac[c] + r1p[c] -> pi[c] + nicrns[c]	NAD metabolism
NADK	NAD Kinase	atp[c] + nad[c] -> h[c] + adp[c] + nadp[c]	NAD metabolism
NADS2	NAD Synthase (Glutamine-Hydrolysing)	h2o[c] + atp[c] + gln_L[c] + dnad[c] -> h[c] + nad[c] + glu_L[c] + amp[c] + ppi[c]	NAD metabolism
NT5C	Nicotinate D-Ribonucleotide Phosphohydrolase	h2o[c] + nicrnt[c] -> pi[c] + nicrns[c]	NAD metabolism
NADN	NAD Nucleosidase	h2o[c] + nad[c] -> h[c] + adprib[c] + ncam[c]	NAD metabolism
ADK3	Adentylate Kinase (GTP)	amp[c] + gtp[c] <=> adp[c] + gdp[c]	Nucleotide interconversion
ADSL1	Adenylosuccinate Lyase	dcamp[c] -> amp[c] + fum[c]	Nucleotide interconversion
CYTDK1	ATPcytidine 5-Phosphotransferase	atp[c] + cytd[c] -> h[c] + adp[c] + cmp[c]	Nucleotide interconversion
CYTK12	Cytidylate Kinase (dCMP, dCTP)	dcmp[c] + dctp[c] <=> 2 dcdp[c]	Nucleotide interconversion
CYTK14	Cytidylate Kinase (dCMP, UTP)	dcmp[c] + utp[c] <=> udp[c] + dcdp[c]	Nucleotide interconversion
CYTK3	Cytidylate Kinase (CMP) (GTP)	gtp[c] + cmp[c] <=> gdp[c] + cdp[c]	Nucleotide interconversion
CYTK4	Cytidylate Kinase (dCMP) (GTP)	gtp[c] + dcmp[c] <=> gdp[c] + dcdp[c]	Nucleotide interconversion
CYTK5	Cytidylate Kinase (dCMP)	ctp[c] + dcmp[c] <=> cdp[c] + dcdp[c]	Nucleotide interconversion
CYTK6	Cytidylate Kinase (CMP, CTP)	cmp[c] + ctp[c] <=> 2 cdp[c]	Nucleotide interconversion
CYTK7	Cytidylate Kinase (CMP, UTP)	cmp[c] + utp[c] <=> udp[c] + cdp[c]	Nucleotide interconversion
CYTK9	Cytidylate Kinase (CMP, dCTP)	cmp[c] + dctp[c] <=> cdp[c] + dcdp[c]	Nucleotide interconversion
DGNSKm	Deoxyguanosine Kinase	atp[m] + dgsn[m] -> h[m] + adp[m] + dgmp[m]	Nucleotide interconversion
NDP7er	Nucleoside-Diphosphatase (UDP), Endoplasmic Reticulum	h2o[r] + udp[r] -> h[r] + pi[r] + ump[r]	Nucleotide interconversion
NDP8	Nucleoside-Diphosphatase (dUDP)	h2o[c] + dudp[c] -> h[c] + pi[c] + dump[c]	Nucleotide interconversion
NDPK1m	Nucleoside-Diphosphate Kinase (ATP:GDP), Mitochondrial	atp[m] + gdp[m] <=> adp[m] + gtp[m]	Nucleotide interconversion
NDPK4m	Nucleoside-Diphosphate Kinase (ATP:dTDP), Mitochondrial	atp[m] + dtdp[m] -> adp[m] + dttp[m]	Nucleotide interconversion
TMDK1m	Thymidine Kinase (ATP:Thymidine)	atp[m] + thymd[m] -> h[m] + adp[m] + dtmp[m]	Nucleotide interconversion
TRDR	Thioredoxin Reductase (NADPH)	h[c] + nadph[c] + trdox[c] -> nadp[c] + trdrd[c]	Nucleotide interconversion
UMPK2	UMP Kinase (CTP)	ctp[c] + ump[c] <=> udp[c] + cdp[c]	Nucleotide interconversion
UMPK3	UMP Kinase (UTP)	utp[c] + ump[c] <=> 2 udp[c]	Nucleotide interconversion
UMPK4	UMP Kinase (GTP)	gtp[c] + ump[c] <=> udp[c] + gdp[c]	Nucleotide interconversion
ADK1	Adenylate Kinase	atp[c] + amp[c] <=> 2 adp[c]	Nucleotide interconversion
ADSS	Adenylosuccinate Synthase	asp_L[c] + gtp[c] + imp[c] -> 2 h[c] + pi[c] + gdp[c] + dcamp[c]	Nucleotide interconversion
CTPS1	CTP Synthase (NH3)	nh4[c] + atp[c] + utp[c] -> 2 h[c] + adp[c] + pi[c] + ctp[c]	Nucleotide interconversion
DGK1	Deoxyguanylate Kinase (dGMP:ATP)	atp[c] + dgmp[c] <=> adp[c] + dgdp[c]	Nucleotide interconversion
DTMPK	DTMP Kinase	atp[c] + dtmp[c] -> adp[c] + dtdp[c]	Nucleotide interconversion
DURIPP	Deoxyuridine Phosphorylase	pi[c] + duri[c] <=> 2dr1p[c] + ura[c]	Nucleotide interconversion
GK1	Guanylate Kinase (GMP:ATP)	atp[c] + gmp[c] <=> adp[c] + gdp[c]	Nucleotide interconversion
GMPS2	GMP Synthase	h2o[c] + atp[c] + gln_L[c] + xmp[c] -> 2 h[c] + glu_L[c] + amp[c] + ppi[c] + gmp[c]	Nucleotide interconversion
IMPD	IMP Dehydrogenase	h2o[c] + nad[c] + imp[c] -> h[c] + nadh[c] + xmp[c]	Nucleotide interconversion
NDPK1	Nucleoside-Diphosphate Kinase (ATP:GDP)	atp[c] + gdp[c] <=> adp[c] + gtp[c]	Nucleotide interconversion
NDPK2	Nucleoside-Diphosphate Kinase (ATP:UDP)	atp[c] + udp[c] <=> adp[c] + utp[c]	Nucleotide interconversion
NDPK3	Nucleoside-Diphosphate Kinase (ATP:CDP)	atp[c] + cdp[c] <=> adp[c] + ctp[c]	Nucleotide interconversion
NDPK4	Nucleoside-Diphosphate Kinase (ATP:dTDP)	atp[c] + dtdp[c] <=> adp[c] + dttp[c]	Nucleotide interconversion
NDPK5	Nucleoside-Diphosphate Kinase (ATP:dGDP)	atp[c] + dgdp[c] <=> adp[c] + dgtp[c]	Nucleotide interconversion
NDPK6	Nucleoside-Diphosphate Kinase (ATP:dUDP)	atp[c] + dudp[c] <=> adp[c] + dutp[c]	Nucleotide interconversion
NDPK7	Nucleoside-Diphosphate Kinase (ATP:dCDP)	atp[c] + dcdp[c] <=> adp[c] + dctp[c]	Nucleotide interconversion
NDPK8	Nucleoside-Diphosphate Kinase (ATP:dADP)	atp[c] + dadp[c] <=> adp[c] + datp[c]	Nucleotide interconversion
PUNP1	Purine-Nucleoside Phosphorylase (Adenosine)	pi[c] + adn[c] <=> ade[c] + r1p[c]	Nucleotide interconversion
RNDR1	Ribonucleoside-Diphosphate Reductase (ADP)	adp[c] + trdrd[c] -> h2o[c] + dadp[c] + trdox[c]	Nucleotide interconversion
RNDR4	Ribonucleoside-Diphosphate Reductase (UDP)	udp[c] + trdrd[c] -> h2o[c] + dudp[c] + trdox[c]	Nucleotide interconversion
TMDK1	Thymidine Kinase (ATP:Thymidine)	atp[c] + thymd[c] -> h[c] + adp[c] + dtmp[c]	Nucleotide interconversion
UMPK	UMP Kinase	atp[c] + ump[c] <=> adp[c] + udp[c]	Nucleotide interconversion
NTD7	5'-Nucleotidase (AMP)	h2o[c] + amp[c] -> pi[c] + adn[c]	Nucleotide interconversion
NTD9	5'-Nucleotidase (GMP)	h2o[c] + gmp[c] -> pi[c] + gsn[c]	Nucleotide interconversion
ADPRDP	ADPribose Diphosphatase	h2o[c] + adprib[c] -> 2 h[c] + amp[c] + r5p[c]	Nucleotide interconversion
ADNK1	Adenosine Kinase	atp[c] + adn[c] -> h[c] + adp[c] + amp[c]	Nucleotide interconversion
CYTK1	Cytidylate Kinase (CMP)	atp[c] + cmp[c] <=> adp[c] + cdp[c]	Nucleotide interconversion
CYTK2	Cytidylate Kinase (dCMP)	atp[c] + dcmp[c] <=> adp[c] + dcdp[c]	Nucleotide interconversion
TMDS	Thymidylate Synthase	mlthf[c] + dump[c] -> dhf[c] + dtmp[c]	Nucleotide interconversion
ADPT	Adenine Phosphoribosyltransferase	ade[c] + prpp[c] -> amp[c] + ppi[c]	Nucleotide salvage pathway
GUAPRT	Guanine Phosphoribosyltransferase	gua[c] + prpp[c] -> ppi[c] + gmp[c]	Nucleotide salvage pathway
HXPRT	Hypoxanthine Phosphoribosyltransferase (Hypoxanthine)	hxan[c] + prpp[c] -> ppi[c] + imp[c]	Nucleotide salvage pathway
PPAm	Inorganic Diphosphatase	h2o[m] + ppi[m] -> h[m] + 2 pi[m]	Oxidative phosphorylation
r0205	Sn-Glycerol-3-Phosphate: (Acceptor) 2-Oxidoreductase	q10[m] + glyc3p[c] -> dhap[c] + q10h2[m]	Oxidative phosphorylation
FADH2ETC	Complex Ii Reaction for Respiratory Chain	fadh2[m] + q10[m] -> fad[m] + q10h2[m]	Oxidative phosphorylation
GLYC3PFADm	Glycerophosphate Shuttle for Trasnfer of Reducing Equivalents	fad[m] + glyc3p[m] -> fadh2[m] + dhap[m]	Oxidative phosphorylation
PPA	Inorganic Diphosphatase	h2o[c] + ppi[c] -> h[c] + 2 pi[c]	Oxidative phosphorylation
G6PDH2c	Glucose 6-Phosphate Dehydrogenase	3 nadp[c] + 3 g6p[c] -> 3 h[c] + 3 nadph[c] + 3 6pgl[c]	Pentose phosphate pathway
GNDc	Phosphogluconate Dehydrogenase	3 nadp[c] + 3 6pgc[c] -> 3 nadph[c] + 3 co2[c] + 3 ru5p_D[c]	Pentose phosphate pathway
PGLc	6-Phosphogluconolactonase	3 h2o[c] + 3 6pgl[c] -> 3 h[c] + 3 6pgc[c]	Pentose phosphate pathway
RPEc	Ribulose 5-Phosphate 3-Epimerase	2 ru5p_D[c] <=> 2 xu5p_D[c]	Pentose phosphate pathway
GLYPHEHYc	Hydrolysis of Glycylphenylalanine	h2o[c] + glyphe[c] <=> gly[c] + phe_L[c]	Pentose phosphate pathway
PPM	Phosphopentomutase	r1p[c] <=> r5p[c]	Pentose phosphate pathway
PRPPS	Phosphoribosylpyrophosphate Synthetase	atp[c] + r5p[c] -> h[c] + amp[c] + prpp[c]	Pentose phosphate pathway
RPI	Ribose-5-Phosphate Isomerase	r5p[c] <=> ru5p_D[c]	Pentose phosphate pathway
TALA	Transaldolase	g3p[c] + s7p[c] <=> f6p[c] + e4p[c]	Pentose phosphate pathway
TKT1	Transketolase	xu5p_D[c] + r5p[c] <=> g3p[c] + s7p[c]	Pentose phosphate pathway
TKT2	Transketolase	xu5p_D[c] + e4p[c] <=> g3p[c] + f6p[c]	Pentose phosphate pathway
RBK	Ribokinase	atp[c] + rib_D[c] -> h[c] + adp[c] + r5p[c]	Pentose phosphate pathway
ADA	Adenosine Deaminase	h2o[c] + h[c] + adn[c] -> nh4[c] + ins[c]	Purine catabolism
GUAD	Guanine Deaminase	h2o[c] + h[c] + gua[c] -> nh4[c] + xan[c]	Purine catabolism
XAO2x	Xanthine Oxidase	o2[x] + h2o[x] + hxan[x] -> h2o2[x] + xan[x]	Purine catabolism
XAOx	Xanthine Oxidase, Peroxisomal	o2[x] + h2o[x] + xan[x] -> h2o2[x] + urate[x]	Purine catabolism
PUNP2	Purine-Nucleoside Phosphorylase (Deoxyadenosine)	pi[c] + dad_2[c] <=> 2dr1p[c] + ade[c]	Purine catabolism
PUNP3	Purine-Nucleoside Phosphorylase (Guanosine)	pi[c] + gsn[c] <=> gua[c] + r1p[c]	Purine catabolism
PUNP4	Purine-Nucleoside Phosphorylase (Deoxyguanosine)	pi[c] + dgsn[c] <=> 2dr1p[c] + gua[c]	Purine catabolism
PUNP5	Purine-Nucleoside Phosphorylase (Inosine)	pi[c] + ins[c] <=> hxan[c] + r1p[c]	Purine catabolism
PUNP6	Purine-Nucleoside Phosphorylase (Deoxyinosine)	pi[c] + din[c] <=> 2dr1p[c] + hxan[c]	Purine catabolism
NTD11	5'-Nucleotidase (IMP)	h2o[c] + imp[c] -> pi[c] + ins[c]	Purine catabolism
ADSL2	Adenylosuccinate Lyase	25aics[c] -> fum[c] + aicar[c]	Purine synthesis
AIRCr	Phosphoribosylaminoimidazole Carboxylase	co2[c] + air[c] <=> h[c] + 5aizc[c]	Purine synthesis
GARFT	Phosphoribosylglycinamide Formyltransferase	10fthf[c] + gar[c] <=> h[c] + thf[c] + fgam[c]	Purine synthesis
PRAGSr	Phosphoribosylglycinamide Synthase	atp[c] + gly[c] + pram[c] -> h[c] + adp[c] + pi[c] + gar[c]	Purine synthesis
PRASCS	Phosphoribosylaminoimidazolesuccinocarboxamide Synthase	atp[c] + asp_L[c] + 5aizc[c] -> h[c] + adp[c] + pi[c] + 25aics[c]	Purine synthesis
ADNK3	Adenosine Kinase	adn[c] + gtp[c] -> h[c] + amp[c] + gdp[c]	Purine synthesis
ADNK4	Adenosine Kinase	adn[c] + dgtp[c] -> h[c] + amp[c] + dgdp[c]	Purine synthesis
INSK	Insosine Kinase	atp[c] + ins[c] -> h[c] + adp[c] + imp[c]	Purine synthesis
AICART	Phosphoribosylaminoimidazolecarboxamide Formyltransferase	10fthf[c] + aicar[c] <=> thf[c] + fprica[c]	Purine synthesis
GLUPRT	Glutamine Phosphoribosyldiphosphate Amidotransferase	h2o[c] + gln_L[c] + prpp[c] -> glu_L[c] + ppi[c] + pram[c]	Purine synthesis
IMPC	IMP Cyclohydrolase	h2o[c] + imp[c] <=> fprica[c]	Purine synthesis
PRFGS	Phosphoribosylformylglycinamidine Synthase	h2o[c] + atp[c] + gln_L[c] + fgam[c] -> h[c] + adp[c] + pi[c] + glu_L[c] + fpram[c]	Purine synthesis
BUP2	Beta-Ureidopropionase (D-3-Amino-Isobutanoate Forming)	h2o[c] + 2 h[c] + 3uib[c] -> nh4[c] + co2[c] + 3aib_D[c]	Pyrimidine catabolism
CYTD	Cytidine Deaminase	h2o[c] + h[c] + cytd[c] -> nh4[c] + uri[c]	Pyrimidine catabolism
D3AIBTm	D-3-Amino-Isobutanoate:Pyruvate Aminotransferase, Mitochondrial	pyr[m] + 3aib_D[m] <=> 2mop[m] + ala_L[m]	Pyrimidine catabolism
DCYTD	Deoxycytidine Deaminase	h2o[c] + h[c] + dcyt[c] -> nh4[c] + duri[c]	Pyrimidine catabolism
DHPM1	Dihydropyrimidinase (5, 6-Dihydrouracil)	h2o[c] + 56dura[c] -> h[c] + cala[c]	Pyrimidine catabolism
DHPM2	Dihydropyrimidinase (Dihydrothymine)	h2o[c] + 56dthm[c] -> h[c] + 3uib[c]	Pyrimidine catabolism
DURAD	Dihydrouracil Dehydrogenase (NADP)	nadp[c] + 56dura[c] <=> h[c] + nadph[c] + ura[c]	Pyrimidine catabolism
DURAD2	Dihydrothymin Dehydrogenase (NADP)	nadp[c] + 56dthm[c] <=> h[c] + nadph[c] + thym[c]	Pyrimidine catabolism
PYNP2r	Pyrimidine-Nucleoside Phosphorylase (Uracil)	pi[c] + uri[c] <=> ura[c] + r1p[c]	Pyrimidine catabolism
TMDPP	Thymidine Phosphorylase	pi[c] + thymd[c] <=> 2dr1p[c] + thym[c]	Pyrimidine catabolism
UPPN	B-Ureidopropionase	h2o[c] + 2 h[c] + cala[c] -> nh4[c] + co2[c] + ala_B[c]	Pyrimidine catabolism
DUTPDP	DUTP Diphosphatase	h2o[c] + dutp[c] -> h[c] + ppi[c] + dump[c]	Pyrimidine catabolism
NTD2	5'-Nucleotidase (UMP)	h2o[c] + ump[c] -> pi[c] + uri[c]	Pyrimidine catabolism
NTD4	5'-Nucleotidase (CMP)	h2o[c] + cmp[c] -> pi[c] + cytd[c]	Pyrimidine catabolism
NTD5	5'-Nucleotidase (dTMP)	h2o[c] + dtmp[c] -> pi[c] + thymd[c]	Pyrimidine catabolism
NTD3	5'-Nucleotidase (dCMP)	h2o[c] + dcmp[c] -> pi[c] + dcyt[c]	Pyrimidine catabolism
ASPCTr	Aspartate Carbamoyltransferase (Reversible)	asp_L[c] + cbp[c] <=> h[c] + pi[c] + cbasp[c]	Pyrimidine synthesis
DHORD9	Dihydoorotic Acid Dehydrogenase (Quinone 10)	q10[m] + dhor_S[c] -> q10h2[m] + orot[c]	Pyrimidine synthesis
ORPT	Orotate Phosphoribosyltransferase	ppi[c] + orot5p[c] <=> orot[c] + prpp[c]	Pyrimidine synthesis
DTMPKm	DTMP Kinase in Mitochondria	atp[m] + dtmp[m] -> adp[m] + dtdp[m]	Pyrimidine synthesis
CBPS	Carbamoyl-Phosphate Synthase (Glutamine-Hydrolysing)	h2o[c] + 2 atp[c] + hco3[c] + gln_L[c] -> 2 h[c] + 2 adp[c] + pi[c] + glu_L[c] + cbp[c]	Pyrimidine synthesis
CTPS2	CTP Synthase (Glutamine)	h2o[c] + atp[c] + gln_L[c] + utp[c] -> 2 h[c] + adp[c] + pi[c] + glu_L[c] + ctp[c]	Pyrimidine synthesis
DHORTS	Dihydroorotase	h2o[c] + dhor_S[c] <=> h[c] + cbasp[c]	Pyrimidine synthesis
OMPDC	Orotidine-5'-Phosphate Decarboxylase	h[c] + orot5p[c] -> co2[c] + ump[c]	Pyrimidine synthesis
ME2	Malic Enzyme (NADP)	nadp[c] + mal_L[c] -> pyr[c] + nadph[c] + co2[c]	Pyruvate metabolism
ME2m	Malic Enzyme (NADP), Mitochondrial	nadp[m] + mal_L[m] -> nadph[m] + co2[m] + pyr[m]	Pyruvate metabolism
PCm	Pyruvate Carboxylase	pyr[m] + atp[m] + hco3[m] -> h[m] + adp[m] + pi[m] + oaa[m]	Pyruvate metabolism
SPODMm	Superoxide Dismutase	2 h[m] + 2 o2s[m] -> o2[m] + h2o2[m]	ROS detoxification
UDPGD	UDPglucose 6-Dehydrogenase	h2o[c] + 2 nad[c] + udpg[c] -> 3 h[c] + 2 nadh[c] + udpglcur[c]	Starch and sucrose metabolism
MALT	Alpha-Glucosidase	h2o[c] + malt[c] -> 2 glc_D[c]	Starch and sucrose metabolism
UGT1A10r	UDP-Glucuronosyltransferase 1-10 Precursor, Microsomal	bilirub[r] + udpglcur[r] <=> bilglcur[r] + udp[r]	Steroid metabolism
UGT1A2r	UDP-Glucuronosyltransferase 1-10 Precursor, Microsomal	bilirub[r] + 2 udpglcur[r] -> bildglcur[r] + 2 udp[r]	Steroid metabolism
3SALAOX	Cysteinesulfinic Acid Oxidase	o2[c] + 2 h[c] + 2 3sala[c] -> 2 Lcyst[c]	Taurine and hypotaurine metabolism
CYSO	Cysteine Oxidase	o2[c] + cys_L[c] -> 2 h[c] + 3sala[c]	Taurine and hypotaurine metabolism
LCYSTCBOXL	3-Sulfoalanine Carboxy-Lyase	h[c] + Lcyst[c] -> co2[c] + taur[c]	Taurine and hypotaurine metabolism
TDP	Thiamin Pyrophosphatase	h2o[c] + thmpp[c] -> h[c] + pi[c] + thmmp[c]	Thiamine metabolism
THMP	Thiamin Phosphatase	h2o[c] + thmmp[c] -> pi[c] + thm[c]	Thiamine metabolism
TMDPK	Thiamin Pyrophosphokinase (Ec 2.7.6.2)	atp[c] + thm[c] -> h[c] + amp[c] + thmpp[c]	Thiamine metabolism
BILDGLCURtr	Glucuronidated Compound Transport	bildglcur[c] <=> bildglcur[r]	Transport, endoplasmic reticular
BILGLCURtr	Glucuronidated Compound Transport	bilglcur[c] <=> bilglcur[r]	Transport, endoplasmic reticular
BILIRUBtr	Lipid, Flip-Flop Intracellular Transport	bilirub[c] <=> bilirub[r]	Transport, endoplasmic reticular
CO2ter	CO2 Endoplasmic Reticular Transport via Diffusion	co2[c] <=> co2[r]	Transport, endoplasmic reticular
FORtr	Transport of Formate, Endoplasmatic Reticulum	for[c] <=> for[r]	Transport, endoplasmic reticular
G6Pter	Glucose 6-Phosphate Endoplasmic Reticular Transport via Diffusion	g6p[c] <=> g6p[r]	Transport, endoplasmic reticular
GLCter	Glucose Transport, Endoplasmic Reticulum	glc_D[c] <=> glc_D[r]	Transport, endoplasmic reticular
H2Oter	H2O Endoplasmic Reticulum Transport	h2o[c] <=> h2o[r]	Transport, endoplasmic reticular
Htr	H Transporter, Endoplasmic Reticulum	h[c] <=> h[r]	Transport, endoplasmic reticular
NADPHtru	Transport of NADPH, Endoplasmic Reticulum	nadph[c] -> nadph[r]	Transport, endoplasmic reticular
NADPtru	Transport of NADP, Endoplasmic Reticulum	nadp[r] -> nadp[c]	Transport, endoplasmic reticular
O2ter	Transport of Oxygen, Endoplasmic Reticulum	o2[c] <=> o2[r]	Transport, endoplasmic reticular
PIter	Phosphate Transport, Endoplasmic Reticulum	pi[r] <=> pi[c]	Transport, endoplasmic reticular
PPItr	Diphosphate Transporter, Endoplasmic Reticulum	ppi[c] <=> ppi[r]	Transport, endoplasmic reticular
UMPtr	UMP Transport, Endoplasmatic Reticulum	ump[c] <=> ump[r]	Transport, endoplasmic reticular
HPETFABP1tc	Transport of 5-HPETE into the Enterocytes	2 5HPET[c] <=> 2 5HPET[r]	Transport, endoplasmic reticular
PEHSFABPe	Transport of Lysophosphatidylethanolamine	2 pe_hs[c] <=> 2 pe_hs[r]	Transport, endoplasmic reticular
PMTCOAFABP1tc	Transport of Palmitoyl Coenzyme A	2 pmtcoa[c] <=> 2 pmtcoa[r]	Transport, endoplasmic reticular
CHSTEROLtrc	Transport of Cholesterol into the Cytosol	chsterol[r] <=> chsterol[c]	Transport, endoplasmic reticular
FRDPtcr	Transport of Farnesyl Diphosphate into the Endoplasmic Reticulum	frdp[c] <=> frdp[r]	Transport, endoplasmic reticular
2HCO3_NAt	Bicarbonate Transport (Na/Hco3 1:2 Symport)	2 hco3[e] + na1[e] <=> 2 hco3[c] + na1[c]	Transport, extracellular
34DHPHEt	3, 4-Dihydroxy-L-Phenylalanine Transport	34dhphe[e] <=> 34dhphe[c]	Transport, extracellular
ADNt	Adenosine Faciliated Transport in Cytosol	adn[e] <=> adn[c]	Transport, extracellular
ALACYSNaEx	L-Alanine/L-Cysteine Na-Dependent Exchange (Ala-L In)	na1[e] + ala_L[e] + cys_L[c] -> na1[c] + ala_L[c] + cys_L[e]	Transport, extracellular
ALADGLNexR	L-Alanine/Glutamine Reversible Antiport	ala_D[e] + gln_L[c] <=> ala_D[c] + gln_L[e]	Transport, extracellular
ALADGLYexR	D-Alanine/Glycine Reversible Antiport	ala_D[e] + gly[c] <=> ala_D[c] + gly[e]	Transport, extracellular
ALAGLNexR	L-Alanine/Glutamine Reversible Antiport	ala_L[e] + gln_L[c] <=> ala_L[c] + gln_L[e]	Transport, extracellular
ALAGLYexR	L-Alanine/Glycine Reversible Antiport	ala_L[e] + gly[c] <=> ala_L[c] + gly[e]	Transport, extracellular
ALASERNaEx	L-Alanine/L-Serine Na-Dependent Exchange (Ala-L In)	na1[e] + ala_L[e] + ser_L[c] -> na1[c] + ala_L[c] + ser_L[e]	Transport, extracellular
ALAt4	Alanine-Sodium Symporter	na1[e] + ala_L[e] -> na1[c] + ala_L[c]	Transport, extracellular
ALATHRNaEx	L-Alanine/L-Threonine Na-Dependent Exchange (Ala-L In)	na1[e] + ala_L[e] + thr_L[c] -> na1[c] + ala_L[c] + thr_L[e]	Transport, extracellular
ASCBt	L-Ascorbate Transport via Facilitated Diffusion	ascb_L[e] <=> ascb_L[c]	Transport, extracellular
BILDGLCURte	Bilirubin Beta-Diglucuronide Transport Mdr	h2o[c] + atp[c] + bildglcur[c] -> h[c] + adp[c] + pi[c] + bildglcur[e]	Transport, extracellular
CHOLATEt3	ABC Bile Acid Transporter	h2o[c] + atp[c] + cholate[c] -> h[c] + adp[c] + pi[c] + cholate[e]	Transport, extracellular
CHOLtu	Choline Uniport	chol[e] <=> chol[c]	Transport, extracellular
COt	Transporter of Carbon Monoxide via Diffusion	co[c] <=> co[e]	Transport, extracellular
CRNt	L-Carnitine Reversible Transport	crn[e] <=> crn[c]	Transport, extracellular
CYSALANaEx	L-Alanine/L-Cysteine Na-Dependent Exchange (Cys-L In)	na1[e] + ala_L[c] + cys_L[e] -> na1[c] + ala_L[e] + cys_L[c]	Transport, extracellular
CYSGLUexR	L-Cysteine/L-Glutamine Reversible Exchanger	cys_L[e] + gln_L[c] <=> cys_L[c] + gln_L[e]	Transport, extracellular
CYSGLYexR	L-Cysteine/Glycine Reversible Exchanger	cys_L[c] + gly[e] <=> cys_L[e] + gly[c]	Transport, extracellular
CYSSERNaEx	L-Serine/L-Cysteine Na-Dependent Exchange (Cys-L In)	na1[e] + cys_L[e] + ser_L[c] -> na1[c] + cys_L[c] + ser_L[e]	Transport, extracellular
CYStec	Transport of L-Cysteine via Diffusion	cys_L[e] <=> cys_L[c]	Transport, extracellular
CYSTGLUex	L-Cystine/L-Glutamate Exchanger	glu_L[c] + Lcystin[e] -> Lcystin[c] + glu_L[e]	Transport, extracellular
CYSTHRNaEx	L-Cysteine/L-Threonine Na-Dependent Exchange (Cys-L In)	na1[e] + cys_L[e] + thr_L[c] -> na1[c] + cys_L[c] + thr_L[e]	Transport, extracellular
CYTDt	Cytidine Faciliated Transport in Cytosol	cytd[e] <=> cytd[c]	Transport, extracellular
DADNt4	Deoxyadenosine Transport via Diffusion	dad_2[e] <=> dad_2[c]	Transport, extracellular
DCYTt	Deoxycytidine Transport via Diffusion	dcyt[e] <=> dcyt[c]	Transport, extracellular
DGSNt	Deoyguanosine Transport via Diffusion	dgsn[e] <=> dgsn[c]	Transport, extracellular
DHAAt1r	Dehydroascorbate Transport (Uniport)	dhdascb[e] <=> dhdascb[c]	Transport, extracellular
DINt	Deoxyinosine Transport via Diffusion	din[e] <=> din[c]	Transport, extracellular
DURIt	Transport of Deoxyuridine via_Diffusion	duri[e] <=> duri[c]	Transport, extracellular
FRUt1r	Transport of D-Fructose via Uniport	fru[e] <=> fru[c]	Transport, extracellular
GALt1r	Galactose Transport (Uniport)	gal[e] <=> gal[c]	Transport, extracellular
GAMt1r	Glucosamine Transport (Uniport)	gam[e] <=> gam[c]	Transport, extracellular
GLYt4	Transport of Glycine via Sodium Symport	na1[e] + gly[e] -> na1[c] + gly[c]	Transport, extracellular
GLYt7_211_r	Transport of Glycine via Sodium And Chloride Symport (2:1:1), Reversible	2 na1[e] + gly[e] + cl[e] <=> 2 na1[c] + gly[c] + cl[c]	Transport, extracellular
GSNt	Guanosine Faciliated Transport in Cytosol	gsn[e] <=> gsn[c]	Transport, extracellular
HCO3_CLt	Bicarbonate Transport (Cl-/Hco3- Exchange)	hco3[e] + cl[c] <=> hco3[c] + cl[e]	Transport, extracellular
HDCEAtr	Fatty Acid Transport via Diffusion	hdcea[e] <=> hdcea[c]	Transport, extracellular
ILEtec	Transport of L-Isoleucine via Diffusion	ile_L[e] <=> ile_L[c]	Transport, extracellular
INSt	Transport of Inosine (Diffusion)	ins[e] <=> ins[c]	Transport, extracellular
LEUtec	Transport of L-Leucine via Diffusion	leu_L[e] <=> leu_L[c]	Transport, extracellular
LNLCt	Linoleic Acid (N-C18:2) Transport in via Diffusion	lnlc[e] <=> lnlc[c]	Transport, extracellular
LNLNCAt	Fatty Acid Transport via Diffusion	lnlnca[e] <=> lnlnca[c]	Transport, extracellular
LNLNCGt	Fatty Acid Transport via Diffusion	lnlncg[e] <=> lnlncg[c]	Transport, extracellular
LPCHOLt	Lysophosphatidylcholine Transport	lpchol_hs[e] <=> lpchol_hs[c]	Transport, extracellular
MANt1r	Mannose Transport (Uniport)	man[e] <=> man[c]	Transport, extracellular
METtec	L-Methionine Transport via Diffusion (Extracellular to Cytosol)	met_L[e] <=> met_L[c]	Transport, extracellular
NaKt	Na+/K+ Exchanging ATPase	h2o[c] + atp[c] + na1[c] + k[e] -> h[c] + adp[c] + pi[c] + na1[e] + k[c]	Transport, extracellular
NKCCt	Na+-K+-Cl- Symport	na1[e] + k[e] + 2 cl[e] <=> na1[c] + k[c] + 2 cl[c]	Transport, extracellular
OCDCEAtr	Fatty Acid Transport via Diffusion	ocdcea[e] <=> ocdcea[c]	Transport, extracellular
OCTAt	Octanoate Transport via Diffusion	octa[e] <=> octa[c]	Transport, extracellular
PHEtec	Transport of L-Phenylalanine via Diffusion	phe_L[e] <=> phe_L[c]	Transport, extracellular
PROt4	Na+/Proline-L Symporter	na1[e] + pro_L[e] -> na1[c] + pro_L[c]	Transport, extracellular
RETNt	Retinoic Acid Transport	retn[c] <=> retn[e]	Transport, extracellular
RIBt	Ribose Transport via Diffusion	rib_D[e] <=> rib_D[c]	Transport, extracellular
SERALANaEx	L-Alanine/L-Serine Na-Dependent Exchange (Ser-L In)	na1[e] + ala_L[c] + ser_L[e] -> na1[c] + ala_L[e] + ser_L[c]	Transport, extracellular
SERCYSNaEx	L-Serine/L-Cysteine Na-Dependent Exchange (Ser-L In)	na1[e] + cys_L[c] + ser_L[e] -> na1[c] + cys_L[e] + ser_L[c]	Transport, extracellular
SERDGLNexR	D-Serine/Glutamine Reversible Antiport	gln_L[c] + ser_D[e] <=> gln_L[e] + ser_D[c]	Transport, extracellular
SERDGLYexR	D-Serine/Glycine Reversible Antiport	gly[c] + ser_D[e] <=> gly[e] + ser_D[c]	Transport, extracellular
SERGLNexR	L-Serine/Glutamine Reversible Antiport	gln_L[c] + ser_L[e] <=> gln_L[e] + ser_L[c]	Transport, extracellular
SERGLYexR	L-Serine/Glycine Reversible Antiport	gly[c] + ser_L[e] <=> gly[e] + ser_L[c]	Transport, extracellular
SERLYSNaex	Serine/Lysine Na-Dependent Exchange (Ser In)	na1[e] + ser_L[e] + lys_L[c] -> na1[c] + ser_L[c] + lys_L[e]	Transport, extracellular
SERTHRNaEx	L-Serine/L-Threonine Na-Dependent Exchange (Ser-L In)	na1[e] + ser_L[e] + thr_L[c] -> na1[c] + ser_L[c] + thr_L[e]	Transport, extracellular
THRALANaEx	L-Alanine/L-Threonine Na-Dependent Exchange (Thr-L In)	na1[e] + ala_L[c] + thr_L[e] -> na1[c] + ala_L[e] + thr_L[c]	Transport, extracellular
THRCYSNaEx	L-Cysteine/L-Threonine Na-Dependent Exchange (Thr-L In)	na1[e] + cys_L[c] + thr_L[e] -> na1[c] + cys_L[e] + thr_L[c]	Transport, extracellular
THRGLNexR	L-Threonine/Glycine Reversible Antiport	gln_L[c] + thr_L[e] <=> gln_L[e] + thr_L[c]	Transport, extracellular
THRGLYexR	L-Threonine/Glycine Reversible Antiport	gly[c] + thr_L[e] <=> gly[e] + thr_L[c]	Transport, extracellular
THRSERNaEx	L-Serine/L-Threonine Na-Dependent Exchange (Thr-L In)	na1[e] + ser_L[c] + thr_L[e] -> na1[c] + ser_L[e] + thr_L[c]	Transport, extracellular
THYMDt1	Thymd Transport	thymd[e] -> thymd[c]	Transport, extracellular
TYRt	L-Tyrosine Transport	tyr_L[e] <=> tyr_L[c]	Transport, extracellular
URATEt	Urate Export from Cytosol	urate[c] -> urate[e]	Transport, extracellular
UREAt5	Urea, Water Symport	h2o[e] + urea[e] <=> h2o[c] + urea[c]	Transport, extracellular
URIt	Uridine Faciliated Transport in Cytosol	uri[e] <=> uri[c]	Transport, extracellular
VALtec	L-Valine Transport via Diffusion (Extracellular to Cytosol)	val_L[e] <=> val_L[c]	Transport, extracellular
XYLTt	Xylitol Transport via Passive Diffusion	xylt[e] <=> xylt[c]	Transport, extracellular
r0899	Amino Acid Transporter Atb0+ Facilitated Diffusion	ala_B[c] <=> ala_B[e]	Transport, extracellular
r0944	Active Transport	spmd[c] <=> spmd[e]	Transport, extracellular
r1696	Y+Lat2 Utilized Transport	na1[e] + ala_L[e] + pro_L[c] -> na1[c] + ala_L[c] + pro_L[e]	Transport, extracellular
r2532	Major Facilitator (Mfs) Tcdb:2.A.1.44.1	asn_L[e] <=> asn_L[c]	Transport, extracellular
34DHPHELAT1tc	Transport of 3, 4-Dihydroxy-L-Phenylalanine by Lat1 in Association with 4F2Hc, Across the Apical Surface of the Membranes	34dhphe[e] + leu_L[c] -> 34dhphe[c] + leu_L[e]	Transport, extracellular
4OHPROIMINOtc	Transport of L-Oh-Proline by the Apical Imino Amino Acid Transporters in Kidney And Intestine	2 na1[e] + cl[e] + 4hpro_LT[e] -> 2 na1[c] + cl[c] + 4hpro_LT[c]	Transport, extracellular
ALAALACNc	Hydrolysis of Alanylalanine	h2o[c] + alaala[c] <=> 2 ala_L[c]	Transport, extracellular
ALAALAPEPT1tc	Transport of Alanylalanine by the Apical Pept1 Amino Acid Transporters	h[e] + alaala[e] -> h[c] + alaala[c]	Transport, extracellular
ALAATB0tc	Transport of L-Alanine by Atb0 Transporter	2 na1[e] + ala_L[e] + cl[e] -> 2 na1[c] + ala_L[c] + cl[c]	Transport, extracellular
ALAyLATthc	Transport of Alanine by Y+Lat1 Or Y+Lat2 with Symporter of H	h[e] + ala_L[e] + arg_L[c] -> h[c] + ala_L[c] + arg_L[e]	Transport, extracellular
ARGATB0tc	Transport of L-Arginine by Atb0 Transporter	2 na1[e] + arg_L[e] + cl[e] -> 2 na1[c] + arg_L[c] + cl[c]	Transport, extracellular
ASCBSVCTtc	Transport of L-Ascorbate by Svct1 Or Svct2 Transporter	h2o[c] + atp[c] + 2 na1[e] + ascb_L[e] -> h[c] + adp[c] + pi[c] + 2 na1[c] + ascb_L[c]	Transport, extracellular
ASNATB0tc	Transport of L-Asparagine by Atb0 Transporter	2 na1[e] + asn_L[e] + cl[e] -> 2 na1[c] + asn_L[c] + cl[c]	Transport, extracellular
BALABETAtc	Transport of Beta Alanine by Beta Transport System	2 na1[e] + ala_B[e] + cl[e] -> 2 na1[c] + ala_B[c] + cl[c]	Transport, extracellular
BALAPAT1tc	Transport of Beta Alanine by Pat1 in Renal And Intestinal Cells	h[e] + ala_B[e] -> h[c] + ala_B[c]	Transport, extracellular
BTNTe	Release of Biotin Across the Basolatral Membrane	btn[c] -> btn[e]	Transport, extracellular
CARPEPT1tc	Transport of L-Carnosine by the Apical Pept1 Amino Acid Transporters	h[e] + carn[e] -> h[c] + carn[c]	Transport, extracellular
CYSATB0tc	Transport of L-Cysteine by Atb0 Transporter	2 na1[e] + cys_L[e] + cl[e] -> 2 na1[c] + cys_L[c] + cl[c]	Transport, extracellular
CYSSNAT5tc	Transport of L-Cysteine with Symport of Sodium And Antiport of Proton by Snat5 Transporter	h[c] + na1[e] + cys_L[e] <=> h[e] + na1[c] + cys_L[c]	Transport, extracellular
CYSTALArBATtc	Transport of L-Cystine in Exchange of L-Alanine by B0, +At Transporter	ala_L[c] + Lcystin[e] -> ala_L[e] + Lcystin[c]	Transport, extracellular
CYSTLEUrBATtc	Transport of L-Cystine in Exchange of L-Leucine by B0, +At Transporter	Lcystin[e] + leu_L[c] -> Lcystin[c] + leu_L[e]	Transport, extracellular
GLNATB0tc	Transport of L-Glutamine by Atb0 Transporter	2 na1[e] + gln_L[e] + cl[e] -> 2 na1[c] + gln_L[c] + cl[c]	Transport, extracellular
GLNyLATthc	Transport of Glutamine by Y+Lat1 Or Y+Lat2 with Symporter of H	h[e] + gln_L[e] + arg_L[c] -> h[c] + gln_L[c] + arg_L[e]	Transport, extracellular
GLYGLYCNc	Hydrolysis of Glycylycine for Uptake	h2o[c] + glygly[c] <=> 2 gly[c]	Transport, extracellular
GLYGLYPEPT1tc	Transport of Glycyl-Glycine by the Apical Pept1 Amino Acid Transporters	glygly[e] -> glygly[c]	Transport, extracellular
GLYPHEPEPT1tc	Transport of Glycylphenylalanine by the Apical Pept1 Amino Acid Transporters	h[e] + glyphe[e] -> h[c] + glyphe[c]	Transport, extracellular
GLYPROPEPT1tc	Transport of Glycylproline by the Apical Pept1 Amino Acid Transporters	h[e] + glypro[e] -> h[c] + glypro[c]	Transport, extracellular
GLYSARCNc	Hydrolysis of Glycylsarcosine for Uptake	h2o[c] + glysar[c] <=> gly[c] + sarcs[c]	Transport, extracellular
GLYSARPEPT1tc	Transport of Glycylsarcosine by the Apical Pept1 Amino Acid Transporters	h[e] + glysar[e] -> h[c] + glysar[c]	Transport, extracellular
GLYSNAT5tc	Transport of Glycine with Symport of Sodium And Antiport of Proton by Snat5 Transporter	h[c] + na1[e] + gly[e] <=> h[e] + na1[c] + gly[c]	Transport, extracellular
HISSNAT5tc	Transport of L-Histidine with Symport of Sodium And Antiport of Proton by Snat5 Transporter	h[c] + na1[e] + his_L[e] <=> h[e] + na1[c] + his_L[c]	Transport, extracellular
HISyLATtc	Transport of L-Histidine by Y+Lat1 Or Y+Lat2 Transporters	na1[e] + arg_L[c] + his_L[e] -> na1[c] + arg_L[e] + his_L[c]	Transport, extracellular
HISyLATthc	Transport of Histidine by Y+Lat1 Or Y+Lat2 with Symporter of H	h[e] + arg_L[c] + his_L[e] -> h[c] + arg_L[e] + his_L[c]	Transport, extracellular
ILEATB0tc	Transport of L-Isoleucine by Atb0 Transporter	2 na1[e] + cl[e] + ile_L[e] -> 2 na1[c] + cl[c] + ile_L[c]	Transport, extracellular
LEUATB0tc	Transport of L-Leucine by Atb0 Transporter	2 na1[e] + cl[e] + leu_L[e] -> 2 na1[c] + cl[c] + leu_L[c]	Transport, extracellular
LEUGLYPEPT1tc	Transport of Leucylglycine by the Apical Pept1 Amino Acid Transporters	h[e] + leugly[e] -> h[c] + leugly[c]	Transport, extracellular
LEULEULAPc	Hydrolysis of Leucylleucine	h2o[c] + leuleu[c] <=> 2 leu_L[c]	Transport, extracellular
LEULEUPEPT1tc	Transport of Leucylleucine by the Apical Pept1 Amino Acid Transporters	h[e] + leuleu[e] -> h[c] + leuleu[c]	Transport, extracellular
LEUyLAThtc	Transport of Leucine by Y+Lat1 Or Y+Lat2 with Symporter of H	h[e] + arg_L[c] + leu_L[e] -> h[c] + arg_L[e] + leu_L[c]	Transport, extracellular
LINOFATPtc	Uptake of Linoleic Acid	atp[c] + coa[c] + lnlc[e] -> amp[c] + ppi[c] + lnlccoa[c]	Transport, extracellular
LYSATB0tc	Transport of L-Lysine by Atb0 Transporter	2 na1[e] + lys_L[e] + cl[e] -> 2 na1[c] + lys_L[c] + cl[c]	Transport, extracellular
METATB0tc	Transport of L-Methionine by Atb0 Transporter	2 na1[e] + cl[e] + met_L[e] -> 2 na1[c] + met_L[c] + cl[c]	Transport, extracellular
METyLATthc	Transport of Methionine by Y+Lat1 Or Y+Lat2 with Symporter of H	h[e] + arg_L[c] + met_L[e] -> h[c] + arg_L[e] + met_L[c]	Transport, extracellular
OLEICFATPtc	Uptake of Octadecenoate	atp[c] + coa[c] + ocdcea[e] -> amp[c] + ppi[c] + odecoa[c]	Transport, extracellular
ORNALArBATtc	Antiport of L-Ornithine and L-Alanine by B0, +At Transporter	ala_L[c] + orn[e] -> orn[c] + ala_L[e]	Transport, extracellular
ORNLEUrBATtc	Antiport of L-Ornithine and L-Leucine by B0, +At Transporter	leu_L[c] + orn[e] -> orn[c] + leu_L[e]	Transport, extracellular
PALFATPtc	Transport of Hexadecanoate	atp[c] + coa[c] + hdca[e] -> amp[c] + ppi[c] + pmtcoa[c]	Transport, extracellular
PCHOLHSTDe	Transport of Phosphatidylcholine	pchol_hs[c] -> pchol_hs[e]	Transport, extracellular
PHEATB0tc	Transport of L-Phenylalanine by Atb0 Transporter	2 na1[e] + cl[e] + phe_L[e] -> 2 na1[c] + cl[c] + phe_L[c]	Transport, extracellular
PHEyLATthc	Transport of Phenylalanine by Y+Lat1 Or Y+Lat2 with Symport of H	h[e] + arg_L[c] + phe_L[e] -> h[c] + arg_L[e] + phe_L[c]	Transport, extracellular
PNTORDe	Release of Pantothenate	pnto_R[c] -> pnto_R[e]	Transport, extracellular
PROGLYPEPT1tc	Transport of Prolylglycine by the Apical Pept1 Amino Acid Transporters	h[e] + progly[e] -> h[c] + progly[c]	Transport, extracellular
PROGLYPRO1c	Hydrolysis of Glycylproline	h2o[c] + progly[c] <=> gly[c] + pro_L[c]	Transport, extracellular
PROIMINOtc	Transport of L-Proline by the Apical Imino Amino Acid Transporters	2 na1[e] + cl[e] + pro_L[e] -> 2 na1[c] + cl[c] + pro_L[c]	Transport, extracellular
SERATB0tc	Transport of L-Serine by Atb0	2 na1[e] + ser_L[e] + cl[e] -> 2 na1[c] + ser_L[c] + cl[c]	Transport, extracellular
TAUBETAtc	Transport of Taurine by Beta Transport System	2 na1[e] + cl[e] + taur[e] -> 2 na1[c] + cl[c] + taur[c]	Transport, extracellular
TAUPAT1c	Transport of Taurine by Pat1	h[e] + taur[e] -> h[c] + taur[c]	Transport, extracellular
THMATPe	Transport of Thiamine	h2o[c] + atp[c] + thm[c] -> h[c] + adp[c] + pi[c] + thm[e]	Transport, extracellular
THRATB0tc	Transport of L-Threonine by Atb0 Transporter	2 na1[e] + thr_L[e] + cl[e] -> 2 na1[c] + thr_L[c] + cl[c]	Transport, extracellular
TRPATB0tc	Transport of L-Tryptophan by Atb0 Transporter	2 na1[e] + cl[e] + trp_L[e] -> 2 na1[c] + cl[c] + trp_L[c]	Transport, extracellular
TYRATB0tc	Transport of L-Tyrosine by Atb0 Transporter	2 na1[e] + cl[e] + tyr_L[e] -> 2 na1[c] + cl[c] + tyr_L[c]	Transport, extracellular
VALATB0tc	Transport of L-Valine by Atb0 Transporter	2 na1[e] + cl[e] + val_L[e] -> 2 na1[c] + cl[c] + val_L[c]	Transport, extracellular
VITEtl	Efflux of Alpha-Tocopherol into the Lyphatics in Chylomicrons	h2o[c] + atp[c] + avite1[c] -> h[c] + adp[c] + pi[c] + avite1[e]	Transport, extracellular
VITKtl	Transport of Vitamin K into Lymph	phyQ[c] -> phyQ[e]	Transport, extracellular
3HCO3_NAt	Symport of Bicarbonate and Sodium	3 hco3[e] + na1[e] <=> 3 hco3[c] + na1[c]	Transport, extracellular
4HPROLTASCT1	Transport of Hydroxy-Proline	na1[e] + ala_L[e] + 4hpro_LT[c] -> na1[c] + ala_L[c] + 4hpro_LT[e]	Transport, extracellular
ALA-DTDe	Secretion of D-Alanine	ala_D[c] -> ala_D[e]	Transport, extracellular
ARACHFATPc	Uptake of Arachidate	atp[c] + coa[c] + arach[e] -> amp[c] + ppi[c] + arachcoa[c]	Transport, extracellular
ASPDTDe	D-Aspartate Transport, Extracellular	asp_D[c] <=> asp_D[e]	Transport, extracellular
ASPPROASCT1	Aspartate Intake by System Asct-1 Transporter	na1[e] + asp_L[e] + pro_L[c] -> na1[c] + asp_L[c] + pro_L[e]	Transport, extracellular
ASPte	Diffusion of Aspartate into Blood	asp_L[c] -> asp_L[e]	Transport, extracellular
FE2DMT1	Uptake of Food Iron by Dmt1 Transporter	h[e] + fe2[e] -> h[c] + fe2[c]	Transport, extracellular
FE3MTP1	Transport of Ferrous Iron into Blood	fe3[c] -> fe3[e]	Transport, extracellular
GLUPROASCT1	Glutamate Intake by System Asct-1 Transporter	na1[e] + glu_L[e] + pro_L[c] -> na1[c] + glu_L[c] + pro_L[e]	Transport, extracellular
LEUGLYHYc	Hydrolysis of Leucylglycine	h2o[c] + leugly[c] <=> gly[c] + leu_L[c]	Transport, extracellular
OCDCAFATPc	Uptake of Octadecanoate (N-C18:0)	atp[c] + coa[c] + ocdca[e] -> amp[c] + ppi[c] + stcoa[c]	Transport, extracellular
PHEMEe	Release of Heme into the Blood	pheme[c] -> pheme[e]	Transport, extracellular
PRO_Dtde	D-Proline Transport, Extracellular	pro_D[c] <=> pro_D[e]	Transport, extracellular
PTCRTD	Diffusion of Putriscine into the Endothelial Cells	ptrc[e] <=> ptrc[c]	Transport, extracellular
Q10H2e	Transport of Ubiquinol into Lymph	q10h2[c] <=> q10h2[e]	Transport, extracellular
SFCYSe	Secretion of Sulfocysteine into Extracellular Space	slfcys[c] <=> slfcys[e]	Transport, extracellular
SPRMTDe	Absorption for Spermine Across the Basolateral Side	sprm[e] <=> sprm[c]	Transport, extracellular
TAURCHAe	Secretion of Taurine	taur[c] -> taur[e]	Transport, extracellular
TTDCAFATPc	Uptake of Hexadecanoate	atp[c] + coa[c] + ttdca[e] -> amp[c] + ppi[c] + tdcoa[c]	Transport, extracellular
GCHOLAt3	ABC Bile Acid Transporter	h2o[c] + atp[c] + gchola[c] -> h[c] + adp[c] + pi[c] + gchola[e]	Transport, extracellular
RIBFLVte	Secretion of Riboflavin	h2o[c] + atp[c] + ribflv[c] -> h[c] + adp[c] + pi[c] + ribflv[e]	Transport, extracellular
TCHOLAt3	ABC Bile Acid Transporter	h2o[c] + atp[c] + tchola[c] -> h[c] + adp[c] + pi[c] + tchola[e]	Transport, extracellular
TRPt	L-Tryptophan Transport	trp_L[e] <=> trp_L[c]	Transport, extracellular
r1492	Transport of Potassium	k[c] -> k[e]	Transport, extracellular
CO2t	CO2 Transporter via Diffusion	co2[e] <=> co2[c]	Transport, extracellular
GLYLEUHYDROc	Hydrolysis of Glycylleucine	h2o[c] + glyleu[c] <=> gly[c] + leu_L[c]	Transport, extracellular
GLYLEUPEPT1tc	Transport of Glycylleucine by the Apical Pept1 Amino Acid Transporters	h[e] + glyleu[e] -> h[c] + glyleu[c]	Transport, extracellular
GLYPROPRO1c	Hydrolysis of Prolylglycine	h2o[c] + glypro[c] <=> gly[c] + pro_L[c]	Transport, extracellular
L_LACt2r	L-Lactate Reversible Transport via Proton Symport	h[e] + lac_L[e] <=> h[c] + lac_L[c]	Transport, extracellular
O2t	O2 Transport (Diffusion)	o2[e] <=> o2[c]	Transport, extracellular
PRO1x	L-ProlineNAD+ 5-Oxidoreductase	nad[c] + pro_L[c] -> 2 h[c] + nadh[c] + 1pyr5c[c]	Transport, extracellular
UREAt	Urea Transport via Facilitate Diffusion	urea[e] <=> urea[c]	Transport, extracellular
PYDXNtr	Transport of Pyridoxine via Diffusion	pydxn[e] <=> pydxn[c]	Transport, extracellular
PYDXtr	Transport of Pyridoxal	pydx[e] <=> pydx[c]	Transport, extracellular
PYDAMtr	Transport of Pyridoxamine via Diffusion	pydam[e] <=> pydam[c]	Transport, extracellular
THMt3	Thiamine Transport in via Proton Antiport	h[c] + thm[e] <=> h[e] + thm[c]	Transport, extracellular
DGCHOLte	Bile Acid Intracellular Transport	dgchol[e] <=> dgchol[c]	Transport, extracellular
GCHOLAt	Glycocholate Transport via Bicarbonate Antiport	hco3[c] + gchola[e] <=> hco3[e] + gchola[c]	Transport, extracellular
GCHOLAt2	Glycocholate Transport via Sodium Symport	2 na1[e] + gchola[e] -> 2 na1[c] + gchola[c]	Transport, extracellular
GCHOLAte	Bile Acid Intracellular Transport	gchola[e] <=> gchola[c]	Transport, extracellular
TAURt4_2_r	Taurine Transport (Sodium Symport) (2:1)	2 na1[e] + taur[e] <=> 2 na1[c] + taur[c]	Transport, extracellular
TCHOLAt	Taurocholate Transport via Bicarbonate Antiport	hco3[c] + tchola[e] <=> hco3[e] + tchola[c]	Transport, extracellular
TCHOLAt2	Taurocholate Transport via Sodium Symport	2 na1[e] + tchola[e] -> 2 na1[c] + tchola[c]	Transport, extracellular
TCHOLAte	Bile Acid Intracellular Transport	tchola[e] <=> tchola[c]	Transport, extracellular
TDCHOLAte	Bile Acid Intracellular Transport	tdchola[e] <=> tdchola[c]	Transport, extracellular
GLYt7_311_r	Glycine Reversible Transport via Sodium And Chloride Symport (3:1:1)	3 na1[e] + gly[e] + cl[e] <=> 3 na1[c] + gly[c] + cl[c]	Transport, extracellular
C03990ATP	Transport of Lithocholate, Active Transport	h2o[c] + atp[c] + HC02191[c] -> h[c] + adp[c] + pi[c] + HC02191[e]	Transport, extracellular
C03990t	Transport of Lithocholate, Sodium Symport	na1[c] + HC02191[c] <=> na1[e] + HC02191[e]	Transport, extracellular
C04483t1	Transport of Deoxycholate	h2o[c] + atp[c] + dchac[c] -> h[c] + adp[c] + pi[c] + dchac[e]	Transport, extracellular
C04483t2	Transport of Deoxycholate, Antiport with Bicarbonate	hco3[e] + dchac[c] <=> hco3[c] + dchac[e]	Transport, extracellular
C05463t1	Transport of Taurodeoxycholate	h2o[c] + atp[c] + tdechola[c] -> h[c] + adp[c] + pi[c] + tdechola[e]	Transport, extracellular
C05463t2	Transport of Taurodeoxycholate, Antiport with Bicarbonate	hco3[e] + tdechola[c] <=> hco3[c] + tdechola[e]	Transport, extracellular
HC02194te	Transport of Bile Acid, Ursodeoxycholate, Active Transport	h2o[c] + atp[c] + HC02194[c] -> h[c] + adp[c] + pi[c] + HC02194[e]	Transport, extracellular
HC02220te	Transport of Bile Acid, Sulfochenodeoxycholate, Active Transport	h2o[c] + atp[c] + HC02220[c] -> h[c] + adp[c] + pi[c] + HC02220[e]	Transport, extracellular
12DHCHOLabc	12-Dehydrocholic acid ABC bile acid transporter	h2o[c] + atp[c] + 12dhchol[c] -> h[c] + adp[c] + pi[c] + 12dhchol[e]	Transport, extracellular
12DHCHOLt	12-Dehydrocholic acid transport via bicarbonate countertransport	hco3[c] + 12dhchol[e] <=> hco3[e] + 12dhchol[c]	Transport, extracellular
12DHCHOLt2	12-Dehydrocholic acid transport via sodium cotransport	2 na1[e] + 12dhchol[e] -> 2 na1[c] + 12dhchol[c]	Transport, extracellular
3DHCDCHOLabc	3-Dehydrochenodeoxycholic acid ABC bile acid transporter	h2o[c] + atp[c] + 3dhcdchol[c] -> h[c] + adp[c] + pi[c] + 3dhcdchol[e]	Transport, extracellular
3DHCDCHOLt	3-Dehydrochenodeoxycholic acid transport via bicarbonate countertransport	hco3[c] + 3dhcdchol[e] <=> hco3[e] + 3dhcdchol[c]	Transport, extracellular
3DHCDCHOLt2	3-Dehydrochenodeoxycholic acid transport via sodium cotransport	2 na1[e] + 3dhcdchol[e] -> 2 na1[c] + 3dhcdchol[c]	Transport, extracellular
3DHCHOLabc	3-Dehydrocholic acid ABC bile acid transporter	h2o[c] + atp[c] + 3dhchol[c] -> h[c] + adp[c] + pi[c] + 3dhchol[e]	Transport, extracellular
3DHCHOLt	3-Dehydrocholic acid transport via bicarbonate countertransport	hco3[c] + 3dhchol[e] <=> hco3[e] + 3dhchol[c]	Transport, extracellular
3DHCHOLt2	3-Dehydrocholic acid transport via sodium cotransport	2 na1[e] + 3dhchol[e] -> 2 na1[c] + 3dhchol[c]	Transport, extracellular
3DHDCAabc	3-dehydro-deoxycholic acid ABC bile acid transporter	h2o[c] + atp[c] + 3dhdchol[c] -> h[c] + adp[c] + pi[c] + 3dhdchol[e]	Transport, extracellular
3DHDCAt	3-dehydro-deoxycholic acid transport via bicarbonate countertransport	hco3[c] + 3dhdchol[e] <=> hco3[e] + 3dhdchol[c]	Transport, extracellular
3DHDCAt2	3-dehydro-deoxycholic acid transport via sodium cotransport	2 na1[e] + 3dhdchol[e] -> 2 na1[c] + 3dhdchol[c]	Transport, extracellular
3DHLCAabc	3-dehydro-lithocholic acid ABC bile acid transporter	h2o[c] + atp[c] + 3dhlchol[c] -> h[c] + adp[c] + pi[c] + 3dhlchol[e]	Transport, extracellular
3DHLCAt	3-dehydro-lithocholic acid transport via bicarbonate countertransport	hco3[c] + 3dhlchol[e] <=> hco3[e] + 3dhlchol[c]	Transport, extracellular
3DHLCAt2	3-dehydro-lithocholic acid transport via sodium cotransport	2 na1[e] + 3dhlchol[e] -> 2 na1[c] + 3dhlchol[c]	Transport, extracellular
7DHCDCHOLabc	7-Dehydrochenodeoxycholic acid ABC bile acid transporter	h2o[c] + atp[c] + 7dhcdchol[c] -> h[c] + adp[c] + pi[c] + 7dhcdchol[e]	Transport, extracellular
7DHCDCHOLt	7-Dehydrochenodeoxycholic acid transport via bicarbonate countertransport	hco3[c] + 7dhcdchol[e] <=> hco3[e] + 7dhcdchol[c]	Transport, extracellular
7DHCDCHOLt2	7-Dehydrochenodeoxycholic acid transport via sodium cotransport	2 na1[e] + 7dhcdchol[e] -> 2 na1[c] + 7dhcdchol[c]	Transport, extracellular
7DHCHOLabc	7-Dehydrocholic acid ABC bile acid transporter	h2o[c] + atp[c] + 7dhchol[c] -> h[c] + adp[c] + pi[c] + 7dhchol[e]	Transport, extracellular
7DHCHOLt	7-Dehydrocholic acid transport via bicarbonate countertransport	hco3[c] + 7dhchol[e] <=> hco3[e] + 7dhchol[c]	Transport, extracellular
7DHCHOLt2	7-Dehydrocholic acid transport via sodium cotransport	2 na1[e] + 7dhchol[e] -> 2 na1[c] + 7dhchol[c]	Transport, extracellular
CA24Gte	Glucuronidated bile acid excretion (CA-24G)	h2o[c] + atp[c] + ca24g[c] -> h[c] + adp[c] + pi[c] + ca24g[e]	Transport, extracellular
CA24Gtr	Glucuronidated Compound Transport (CA-24G)	ca24g[c] <=> ca24g[r]	Transport, extracellular
CA3Sabc	Cholic acid 3-sulfate ABC bile acid transporter	h2o[c] + atp[c] + ca3s[c] -> h[c] + adp[c] + pi[c] + ca3s[e]	Transport, extracellular
CA3St	Cholic acid 3-sulfate transport via bicarbonate countertransport	hco3[c] + ca3s[e] <=> hco3[e] + ca3s[c]	Transport, extracellular
CDCA24Gte	Glucuronidated bile acid excretion (CDCA-24G)	h2o[c] + atp[c] + cdca24g[c] -> h[c] + adp[c] + pi[c] + cdca24g[e]	Transport, extracellular
CDCA24Gtr	Glucuronidated Compound Transport (CDCA-24G)	cdca24g[c] <=> cdca24g[r]	Transport, extracellular
CDCA3Gte	Glucuronidated bile acid excretion (CDCA-3G)	h2o[c] + atp[c] + cdca3g[c] -> h[c] + adp[c] + pi[c] + cdca3g[e]	Transport, extracellular
CDCA3Gtr	Glucuronidated Compound Transport (CDCA-3G)	cdca3g[c] <=> cdca3g[r]	Transport, extracellular
HC02220t	Chenodeoxycholic acid 3-sulfate transport via bicarbonate countertransport	hco3[c] + HC02220[e] <=> hco3[e] + HC02220[c]	Transport, extracellular
COPROSTabc	Coprostanol ABC bile acid transporter	h2o[c] + atp[c] + coprost[c] -> h[c] + adp[c] + pi[c] + coprost[e]	Transport, extracellular
COPROSTt	Coprostanol transport via bicarbonate countertransport	hco3[c] + coprost[e] <=> hco3[e] + coprost[c]	Transport, extracellular
COPROSTt2	Coprostanol transport via sodium cotransport	2 na1[e] + coprost[e] -> 2 na1[c] + coprost[c]	Transport, extracellular
DCA24Gte	Glucuronidated bile acid excretion (DCA-24g)	h2o[c] + atp[c] + dca24g[c] -> h[c] + adp[c] + pi[c] + dca24g[e]	Transport, extracellular
DCA24Gtr	Glucuronidated Compound Transport (DCA-24g)	dca24g[c] <=> dca24g[r]	Transport, extracellular
DCA3Gte	Glucuronidated bile acid excretion (DCA-3G)	h2o[c] + atp[c] + dca3g[c] -> h[c] + adp[c] + pi[c] + dca3g[e]	Transport, extracellular
DCA3Gtr	Glucuronidated Compound Transport (DCA-3G)	dca3g[c] <=> dca3g[r]	Transport, extracellular
DCA3Sabc	Deoxycholic acid 3-sulfate ABC bile acid transporter	h2o[c] + atp[c] + dca3s[c] -> h[c] + adp[c] + pi[c] + dca3s[e]	Transport, extracellular
DCA3St	Deoxycholic acid 3-sulfate transport via bicarbonate countertransport	hco3[c] + dca3s[e] <=> hco3[e] + dca3s[c]	Transport, extracellular
GCA3Sabc	Glycocholic acid 3-sulfate ABC bile acid transporter	h2o[c] + atp[c] + gca3s[c] -> h[c] + adp[c] + pi[c] + gca3s[e]	Transport, extracellular
GCA3St	Glycocholic acid 3-sulfate transport via bicarbonate countertransport	hco3[c] + gca3s[e] <=> hco3[e] + gca3s[c]	Transport, extracellular
GCDCA3Sabc	Glycochenodeoxycholic acid 3-sulfate ABC bile acid transporter	h2o[c] + atp[c] + gcdca3s[c] -> h[c] + adp[c] + pi[c] + gcdca3s[e]	Transport, extracellular
GCDCA3St	Glycochenodeoxycholic acid 3-sulfate via bicarbonate countertransport	hco3[c] + gcdca3s[e] <=> hco3[e] + gcdca3s[c]	Transport, extracellular
GDCA3Sabc	Glycodeoxycholic acid 3-sulfate ABC bile acid transporter	h2o[c] + atp[c] + gdca3s[c] -> h[c] + adp[c] + pi[c] + gdca3s[e]	Transport, extracellular
GDCA3St	Glycodeoxycholic acid 3-sulfate via bicarbonate countertransport	hco3[c] + gdca3s[e] <=> hco3[e] + gdca3s[c]	Transport, extracellular
GUDCA3Sabc	Glycoursodeoxycholic acid 3-sulfate ABC bile acid transporter	h2o[c] + atp[c] + gudca3s[c] -> h[c] + adp[c] + pi[c] + gudca3s[e]	Transport, extracellular
GUDCA3St	Glycoursodeoxycholic acid 3-sulfate via bicarbonate countertransport	hco3[c] + gudca3s[e] <=> hco3[e] + gudca3s[c]	Transport, extracellular
HCA24Gte	Glucuronidated bile acid excretion (HCA-24G)	h2o[c] + atp[c] + hca24g[c] -> h[c] + adp[c] + pi[c] + hca24g[e]	Transport, extracellular
HCA24Gtr	Glucuronidated Compound Transport (HCA-24G)	hca24g[c] <=> hca24g[r]	Transport, extracellular
HCA6Gte	Glucuronidated bile acid excretion (HCA-6G)	h2o[c] + atp[c] + hca6g[c] -> h[c] + adp[c] + pi[c] + hca6g[e]	Transport, extracellular
HCA6Gtr	Glucuronidated Compound Transport (HCA-6G)	hca6g[c] <=> hca6g[r]	Transport, extracellular
HDCA24Gte	Glucuronidated bile acid excretion (HDCA-24G)	h2o[c] + atp[c] + hdca24g[c] -> h[c] + adp[c] + pi[c] + hdca24g[e]	Transport, extracellular
HDCA24Gtr	Glucuronidated Compound Transport (HDCA-24G)	hdca24g[c] <=> hdca24g[r]	Transport, extracellular
HDCA6Gte	Glucuronidated bile acid excretion (HDCA-6G)	h2o[c] + atp[c] + hdca6g[c] -> h[c] + adp[c] + pi[c] + hdca6g[e]	Transport, extracellular
HDCA6Gtr	Glucuronidated Compound Transport (HDCA-6G)	hdca6g[c] <=> hdca6g[r]	Transport, extracellular
HYOCHOLabc	hyocholic acid ABC bile acid transporter	h2o[c] + atp[c] + hyochol[c] -> h[c] + adp[c] + pi[c] + hyochol[e]	Transport, extracellular
HYOCHOLt	hyocholic acid transport via bicarbonate countertransport	hco3[c] + hyochol[e] <=> hco3[e] + hyochol[c]	Transport, extracellular
HYOCHOLt2	hyocholic acid transport via sodium cotransport	2 na1[e] + hyochol[e] -> 2 na1[c] + hyochol[c]	Transport, extracellular
HYOCHOLtr	Bile salt transport (hyocholic acid)	hyochol[c] <=> hyochol[r]	Transport, extracellular
ICDCHOLabc	Isochenodeoxycholic acid ABC bile acid transporter	h2o[c] + atp[c] + icdchol[c] -> h[c] + adp[c] + pi[c] + icdchol[e]	Transport, extracellular
ICDCHOLt	Isochenodeoxycholic acid transport via bicarbonate countertransport	hco3[c] + icdchol[e] <=> hco3[e] + icdchol[c]	Transport, extracellular
ICDCHOLt2	Isochenodeoxycholic acid transport via sodium cotransport	2 na1[e] + icdchol[e] -> 2 na1[c] + icdchol[c]	Transport, extracellular
ISOCHOLabc	Isocholic acid ABC bile acid transporter	h2o[c] + atp[c] + isochol[c] -> h[c] + adp[c] + pi[c] + isochol[e]	Transport, extracellular
ISOCHOLt	Isocholic acid transport via bicarbonate countertransport	hco3[c] + isochol[e] <=> hco3[e] + isochol[c]	Transport, extracellular
ISOCHOLt2	Isocholic acid transport via sodium cotransport	2 na1[e] + isochol[e] -> 2 na1[c] + isochol[c]	Transport, extracellular
LCA24Gte	Glucuronidated bile acid excretion (LCA-24G)	h2o[c] + atp[c] + lca24g[c] -> h[c] + adp[c] + pi[c] + lca24g[e]	Transport, extracellular
LCA24Gtr	Glucuronidated Compound Transport (LCA-24G)	lca24g[c] <=> lca24g[r]	Transport, extracellular
LCA3Gte	Glucuronidated bile acid excretion (LCA-3G)	h2o[c] + atp[c] + lca3g[c] -> h[c] + adp[c] + pi[c] + lca3g[e]	Transport, extracellular
LCA3Gtr	Glucuronidated Compound Transport (LCA-3G)	lca3g[c] <=> lca3g[r]	Transport, extracellular
LCA3Sabc	Lithocholic acid 3-sulfate ABC bile acid transporter	h2o[c] + atp[c] + lca3s[c] -> h[c] + adp[c] + pi[c] + lca3s[e]	Transport, extracellular
LCA3St	Lithocholic acid 3-sulfate transport via bicarbonate countertransport	hco3[c] + lca3s[e] <=> hco3[e] + lca3s[c]	Transport, extracellular
M02155tr	Bile salt transport (hyodeoxycholic acid)	M02155[c] <=> M02155[r]	Transport, extracellular
TCA3Sabc	Taurocholic acid 3-sulfate ABC bile acid transporter	h2o[c] + atp[c] + tca3s[c] -> h[c] + adp[c] + pi[c] + tca3s[e]	Transport, extracellular
TCA3St	Taurocholic acid 3-sulfate transport via bicarbonate countertransport	hco3[c] + tca3s[e] <=> hco3[e] + tca3s[c]	Transport, extracellular
TCDCA3Sabc	Taurochenodeoxycholic acid 3-sulfate ABC bile acid transporter	h2o[c] + atp[c] + tcdca3s[c] -> h[c] + adp[c] + pi[c] + tcdca3s[e]	Transport, extracellular
TCDCA3St	Taurochenodeoxycholic acid 3-sulfate transport via bicarbonate countertransport	hco3[c] + tcdca3s[e] <=> hco3[e] + tcdca3s[c]	Transport, extracellular
TDCA3Sabc	Taurodeoxycholic acid 3-sulfate ABC bile acid transporter	h2o[c] + atp[c] + tdca3s[c] -> h[c] + adp[c] + pi[c] + tdca3s[e]	Transport, extracellular
TDCA3St	Taurodeoxycholic acid 3-sulfate transport via bicarbonate countertransport	hco3[c] + tdca3s[e] <=> hco3[e] + tdca3s[c]	Transport, extracellular
THYOCHOLabc	taurohyocholic acid ABC bile acid transporter	h2o[c] + atp[c] + thyochol[c] -> h[c] + adp[c] + pi[c] + thyochol[e]	Transport, extracellular
THYOCHOLt	taurohyocholic acid transport via bicarbonate countertransport	hco3[c] + thyochol[e] <=> hco3[e] + thyochol[c]	Transport, extracellular
THYOCHOLt2	taurohyocholic acid transport via sodium cotransport	2 na1[e] + thyochol[e] -> 2 na1[c] + thyochol[c]	Transport, extracellular
TUDCA3Sabc	Tauroursodeoxycholic acid 3-sulfate ABC bile acid transporter	h2o[c] + atp[c] + tudca3s[c] -> h[c] + adp[c] + pi[c] + tudca3s[e]	Transport, extracellular
TUDCA3St	Tauroursodeoxycholic acid 3-sulfate transport via bicarbonate countertransport	hco3[c] + tudca3s[e] <=> hco3[e] + tudca3s[c]	Transport, extracellular
UCHOLabc	Ursocholic acid ABC bile acid transporter	h2o[c] + atp[c] + uchol[c] -> h[c] + adp[c] + pi[c] + uchol[e]	Transport, extracellular
UCHOLt	Ursocholic acid transport via bicarbonate countertransport	hco3[c] + uchol[e] <=> hco3[e] + uchol[c]	Transport, extracellular
UCHOLt2	Ursocholic acid transport via sodium cotransport	2 na1[e] + uchol[e] -> 2 na1[c] + uchol[c]	Transport, extracellular
UDCA3Sabc	Ursodeoxycholic acid 3-sulfate ABC bile acid transporter	h2o[c] + atp[c] + udca3s[c] -> h[c] + adp[c] + pi[c] + udca3s[e]	Transport, extracellular
UDCA3St	Ursodeoxycholic acid 3-sulfate transport via bicarbonate countertransport	hco3[c] + udca3s[e] <=> hco3[e] + udca3s[c]	Transport, extracellular
UDCHOLt	Ursodeoxycholic acid transport via bicarbonate countertransport	hco3[c] + HC02194[e] <=> hco3[e] + HC02194[c]	Transport, extracellular
UDCHOLt2	Ursodeoxycholic acid transport via sodium cotransport	2 na1[e] + HC02194[e] -> 2 na1[c] + HC02194[c]	Transport, extracellular
4ABUTtm	4-Aminobutanoate Mitochondrial Transport via Diffusion	4abut[c] <=> 4abut[m]	Transport, mitochondrial
AKGMALtm	Alpha-Ketoglutarate/Malate Transporter	akg[m] + mal_L[c] <=> akg[c] + mal_L[m]	Transport, mitochondrial
ARGtm	Arginine Mitochondrial Transport via Ornithine Carrier	h[m] + arg_L[c] <=> h[c] + arg_L[m]	Transport, mitochondrial
ASPGLUm	Aspartate-Glutamate Mitochondrial Shuttle	h[c] + glu_L[c] + asp_L[m] -> h[m] + glu_L[m] + asp_L[c]	Transport, mitochondrial
ATPtm	ADP/ATP Transporter, Mitochondrial	adp[c] + atp[m] -> atp[c] + adp[m]	Transport, mitochondrial
CITRtm	Citrulline Mitochondrial Transport via Proton Antiport	citr_L[m] <=> citr_L[c]	Transport, mitochondrial
CITtbm	Citrate Transport, Mitochondrial	cit[c] + pep[m] <=> pep[c] + cit[m]	Transport, mitochondrial
CO2tm	CO2 Transport (Diffusion), Mitochondrial	co2[c] <=> co2[m]	Transport, mitochondrial
CRNtim	L-Carnitine Transport Out of Mitochondria via Diffusion	crn[m] <=> crn[c]	Transport, mitochondrial
DGSNtm	Deoyguanosine Transport in Mitochondria	dgsn[c] <=> dgsn[m]	Transport, mitochondrial
FE2tm	Transport of Iron (Fe2+), Mitochondrial	h[c] + fe2[c] -> h[m] + fe2[m]	Transport, mitochondrial
FUMtm	Fumarate Transport, Mitochondrial	pi[m] + fum[c] <=> pi[c] + fum[m]	Transport, mitochondrial
GLNtm	L-Glutamine Transport via Electroneutral Transporter	gln_L[c] -> gln_L[m]	Transport, mitochondrial
GLUt2m	L-Glutamate Reversible Transport via Proton Symport, Mitochondrial	h[c] + glu_L[c] <=> h[m] + glu_L[m]	Transport, mitochondrial
GLYCtm	Transport of Glycerol	glyc[c] <=> glyc[m]	Transport, mitochondrial
GLYtm	Transport of Glycine, Passive, Mitochondrial	gly[c] <=> gly[m]	Transport, mitochondrial
H2O2tm	Hydrogen Peroxide Mitochondrial Transport	h2o2[c] -> h2o2[m]	Transport, mitochondrial
H2Otm	H2O Transport, Mitochondrial	h2o[c] <=> h2o[m]	Transport, mitochondrial
MALtm	Malate Transport, Mitochondrial	pi[m] + mal_L[c] <=> pi[c] + mal_L[m]	Transport, mitochondrial
O2tm	Transport of Oxygen, (Diffusion)	o2[c] <=> o2[m]	Transport, mitochondrial
OCCOAtm	Octanoyl Coenzyme A Transport, Diffusion	occoa[c] -> occoa[m]	Transport, mitochondrial
ORNt4m	Ornithine Mitochondrial Transport Exchange with Citruline	h[c] + orn[m] + citr_L[c] <=> h[m] + orn[c] + citr_L[m]	Transport, mitochondrial
PCFLOPm	Phosphatidylcholine Flippase	h2o[c] + atp[c] + pchol_hs[m] -> h[c] + adp[c] + pi[c] + pchol_hs[c]	Transport, mitochondrial
PE_HStm	Phosphatidylethanolamine Scramblase	pe_hs[c] <=> pe_hs[m]	Transport, mitochondrial
PHEMEtm	Transport of Heme	pheme[m] <=> pheme[c]	Transport, mitochondrial
PSFLIPm	Phosphatidylserine Flippase	h2o[c] + atp[c] + ps_hs[c] -> h[c] + adp[c] + pi[c] + ps_hs[m]	Transport, mitochondrial
SARCStm	Transport of Sarcosine, Mitochondrial	sarcs[c] -> sarcs[m]	Transport, mitochondrial
THFtm	5, 6, 7, 8-Tetrahydrofolate Transport, Diffusion, Mitochondrial	thf[c] <=> thf[m]	Transport, mitochondrial
THYMDtm	Thymd Transport	thymd[c] <=> thymd[m]	Transport, mitochondrial
r0801	Mitochondrial Carrier (Mc) Tcdb:2.A.29.21.1	gtp[c] + gdp[m] <=> gdp[c] + gtp[m]	Transport, mitochondrial
r0838	Free Diffusion	nh4[c] <=> nh4[m]	Transport, mitochondrial
r0913	Mitochondrial Carrier (Mc) Tcdb:2.A.29.7.2	icit[m] + mal_L[c] <=> mal_L[m] + icit[c]	Transport, mitochondrial
r0950	Facilitated Diffusion	dgmp[m] -> dgmp[c]	Transport, mitochondrial
r1434	Transport Reaction	ala_L[c] -> ala_L[m]	Transport, mitochondrial
r1435	Transport Reaction	ser_L[c] -> ser_L[m]	Transport, mitochondrial
C4tmc	Transport of Bytyrylcarnitine into Mitochondrial Matrix	c4crn[c] <=> c4crn[m]	Transport, mitochondrial
3AIB_Dtm	Transport of 3Aib_D into Mitochondria	3aib_D[c] <=> 3aib_D[m]	Transport, mitochondrial
AHCYStd	Diffusion of S-Adenosyl-L-Homocysteine	ahcys[m] <=> ahcys[c]	Transport, mitochondrial
AMETtd	Diffusion of S-Adenosyl-L-Methionine	amet[c] <=> amet[m]	Transport, mitochondrial
DATPtm	Transport of dATP into Mitochondria	datp[c] -> datp[m]	Transport, mitochondrial
DCTPtm	Transport of dCTP into Mitochondria	dctp[c] -> dctp[m]	Transport, mitochondrial
DGTPtm	Transport of dGTP into Mitochondria	dgtp[c] -> dgtp[m]	Transport, mitochondrial
DHAPtc	Transport of Dihydroxyacetone Phosphate into Cytosol	dhap[m] -> dhap[c]	Transport, mitochondrial
DTTPtm	Transport of dTTP into Mitochondria	dttp[c] -> dttp[m]	Transport, mitochondrial
GLU5SAtmc	Glutamate Semi-Aldehyde Transport, Mitochondrial	glu5sa[m] <=> glu5sa[c]	Transport, mitochondrial
NADtm	Transport of NAD into Mitochondria	nad[c] <=> nad[m]	Transport, mitochondrial
PPItm	Diphopshate Transporter, Mitochondrial	ppi[c] <=> ppi[m]	Transport, mitochondrial
q10h2tc	Transport of Ubiquinol into Cytosol	q10h2[m] <=> q10h2[c]	Transport, mitochondrial
q10tm	Transport of Ubiquinone into Mitochondria	q10[c] <=> q10[m]	Transport, mitochondrial
DATPtn	DATP Diffusion in Nucleus	datp[c] <=> datp[n]	Transport, nuclear
DCTPtn	DCTP Diffusion in Nucleus	dctp[c] <=> dctp[n]	Transport, nuclear
DGTPtn	DGTP Diffusion in Nucleus	dgtp[c] <=> dgtp[n]	Transport, nuclear
DTTPtn	Transport of dTTP, Nuclear	dttp[c] <=> dttp[n]	Transport, nuclear
1a25DHVITD3TRn	Tanslocation of 1-Alpha, 25-Dihydroxyvitamin D3 to Nucleus	1a25dhvitd3[c] -> 1a25dhvitd3[n]	Transport, nuclear
4ABUTtcn	Transport of GABA	4abut[c] -> 4abut[n]	Transport, nuclear
ASPDxt	D-Aspartate Transport, Peroxisomal	asp_D[x] <=> asp_D[c]	Transport, peroxisomal
COAtp	Transport of Coenzyme A, Peroxisome	coa[c] <=> coa[x]	Transport, peroxisomal
H2O2tp	Hydrogen Peroxide Peroxisomal Transport via Diffusion	h2o2[c] <=> h2o2[x]	Transport, peroxisomal
H2Otp	H2O Transport, Peroxisomal	h2o[c] <=> h2o[x]	Transport, peroxisomal
HXANtx	Hypoxanthine Diffusion in Peroxisome	hxan[c] -> hxan[x]	Transport, peroxisomal
NADHtpu	NADH Transporter, Peroxisome	nadh[c] -> nadh[x]	Transport, peroxisomal
NADPHtxu	Transport of NADPH, Peroxisome	nadph[c] -> nadph[x]	Transport, peroxisomal
NADPtxu	Transport of NADP, Peroxisome	nadp[x] -> nadp[c]	Transport, peroxisomal
NH4tp	Transport of Ammonium ion, Peroxisomal	nh4[c] <=> nh4[x]	Transport, peroxisomal
O2tp	Transport of Oxygen, Peroxisomal	o2[c] <=> o2[x]	Transport, peroxisomal
TMNDNCCOAtx	Fatty Acid Intracellular Transport	tmndnccoa[c] <=> tmndnccoa[x]	Transport, peroxisomal
URATEtx	Urate Export from Peroxisome	urate[x] -> urate[c]	Transport, peroxisomal
XANtx	Xanthine Diffusion in Peroxisome	xan[c] -> xan[x]	Transport, peroxisomal
C16txc	Transport of Palmitoylcoa into Peroxisomes	h2o[c] + atp[c] + pmtcoa[c] -> h[c] + adp[c] + pi[c] + pmtcoa[x]	Transport, peroxisomal
C2tcx	Transport of Acetylcarnitine from Peroxisomes to Cytosol	acrn[x] <=> acrn[c]	Transport, peroxisomal
C4tcx	Transport of Bytyrylcarnitine from Peroxisomes	c4crn[x] <=> c4crn[c]	Transport, peroxisomal
C4x	Esterification of Butyrylcoa to Butyrylcarnitine for Transport	crn[x] + btcoa[x] <=> coa[x] + c4crn[x]	Transport, peroxisomal
STCOATxc	Transport of Stearoyl Coenzyme A from Cytosol to Peroxisomes	h2o[c] + atp[c] + stcoa[c] -> h[c] + adp[c] + pi[c] + stcoa[x]	Transport, peroxisomal
STRDNCCOAtxc	Transport of Stearidonylcoa into Peroxisomes.	h2o[c] + atp[c] + strdnccoa[c] -> h[c] + adp[c] + pi[c] + strdnccoa[x]	Transport, peroxisomal
CRNrtx	Reversible Transport of L-Carnitine in Peroxisome	crn[c] <=> crn[x]	Transport, peroxisomal
LACLt	Lactate Transport	lac_L[x] -> lac_L[c]	Transport, peroxisomal
MAL_Ltx	Transport Reaction for Malate	mal_L[x] <=> mal_L[c]	Transport, peroxisomal
NADtx	Transport of NAD into Peroxisome	nad[c] <=> nad[x]	Transport, peroxisomal
AGPAT1	1-Acylglycerol-3-Phosphate O-Acyltransferase 1	2 h[c] + Rtotal2coa[c] + alpa_hs[c] -> coa[c] + pa_hs[c]	Triacylglycerol synthesis
DGAT	Diacylglycerol Acyltransferase	Rtotal3coa[c] + dag_hs[c] -> coa[c] + tag_hs[c]	Triacylglycerol synthesis
GPAM_hs	Glycerol-3-Phosphate Acyltransferase	Rtotalcoa[c] + glyc3p[c] -> 2 h[c] + coa[c] + alpa_hs[c]	Triacylglycerol synthesis
MOGAT	Monoacylglycerol Acyltransferase	Rtotalcoa[c] + mag_hs[c] -> coa[c] + dag_hs[c]	Triacylglycerol synthesis
PPAP	Phosphatidic Acid Phosphatase	h2o[c] + pa_hs[c] -> pi[c] + dag_hs[c]	Triacylglycerol synthesis
MMEm	Methylmalonyl Coenzyme A Epimerase/Racemase	mmcoa_R[m] <=> mmcoa_S[m]	Valine, leucine, and isoleucine metabolism
MMMm	Methylmalonyl Coenzyme A Mutase	mmcoa_R[m] <=> succoa[m]	Valine, leucine, and isoleucine metabolism
MMSAD1m	Methylmalonate-Semialdehyde Dehydrogenase	nad[m] + coa[m] + 2mop[m] -> nadh[m] + co2[m] + ppcoa[m]	Valine, leucine, and isoleucine metabolism
RADH	Retinal Dehydrogenase	h2o[c] + nad[c] + retinal[c] -> 2 h[c] + nadh[c] + retn[c]	Vitamin A metabolism
RADH2	Retinal Dehydrogenase (NADPH)	h2o[c] + nadp[c] + retinal[c] -> 2 h[c] + nadph[c] + retn[c]	Vitamin A metabolism
RDH1	Retinol Dehydrogenase (All-Trans)	nad[c] + retinol[c] <=> h[c] + nadh[c] + retinal[c]	Vitamin A metabolism
RDH1a	Retinol Dehydrogenase (All-Trans, NADPH)	nadp[c] + retinol[c] -> h[c] + nadph[c] + retinal[c]	Vitamin A metabolism
FADDP	FAD Diphosphatase	h2o[c] + fad[c] -> 2 h[c] + fmn[c] + amp[c]	Vitamin B2 metabolism
FERO	Ferroxidase	o2[c] + 4 h[c] + 4 fe2[c] -> 2 h2o[c] + 4 fe3[c]	Vitamin B2 metabolism
FMNAT	FMN Adenylyltransferase	h[c] + atp[c] + fmn[c] -> ppi[c] + fad[c]	Vitamin B2 metabolism
RBFK	Riboflavin Kinase	atp[c] + ribflv[c] -> h[c] + adp[c] + fmn[c]	Vitamin B2 metabolism
HYPOE	Hypothetical Enyme	h2o[c] + pyam5p[c] -> pi[c] + pydam[c]	Vitamin B6 metabolism
PDXPP	Pyridoxine 5-Phosphate Phosphatase	h2o[c] + pdx5p[c] -> pi[c] + pydxn[c]	Vitamin B6 metabolism
PYDXK	Pyridoxal Kinase	atp[c] + pydx[c] -> h[c] + adp[c] + pydx5p[c]	Vitamin B6 metabolism
PYDXPP	Pyridoxal 5-Phosphate Phosphatase	h2o[c] + pydx5p[c] -> pi[c] + pydx[c]	Vitamin B6 metabolism
PYDAMK	Pyridoxamine Kinase	atp[c] + pydam[c] -> h[c] + adp[c] + pyam5p[c]	Vitamin B6 metabolism
PYDXNK	Pyridoxine Kinase	atp[c] + pydxn[c] -> h[c] + adp[c] + pdx5p[c]	Vitamin B6 metabolism
DASCBR	Dehydroascorbate Reductase	nadph[c] + dhdascb[c] -> nadp[c] + ascb_L[c]	Vitamin C metabolism
25HVITD3c	1-Alpha Hydroxylation of 25-Hydroxy Vitamin D	o2[c] + h[c] + 25hvitd3[c] + nadph[c] -> h2o[c] + nadp[c] + 1a25dhvitd3[c]	Vitamin D metabolism
