# Supplementary material for: Conjugated C-6 hydroxylated bile acids in serum relate to human metabolic health and gut Clostridia species
Source: Sci Rep. 2021 Jun 24;11:13252. doi: 10.1038/s41598-021-91482-y (PMC8225906; doi:10.1038/s41598-021-91482-y)
Supplement: Supplementary file 3 — Supplementary Information 3. [file 41598_2021_91482_MOESM3_ESM.xlsx]

## Sheet: Nodes_Graphv3_ID_species
Supplementary Dataset 2 MGSs in co-abundant communities
Nodes Id	Label	Robust Community	Mean abundance when present	Occurrence	Stability Index	Taxonomical annotation	Order	Phylum	Genus	class	family
1	Acetobacter sp.	Species out of the graph	4.06e-06	25	0.693069	Acetobacter sp.	Rhodospirillales	Proteobacteria	Acetobacter	Alphaproteobacteria	Acetobacteraceae
2	A. intestini	Community Q	2.46e-06	7	0.722772	A. intestini	Acidaminococcales	Firmicutes	Acidaminococcus	Negativicutes	Acidaminococcaceae
3	Acinetobacter sp.	Community O	2.69e-06	36	0.960396	Acinetobacter sp.	Pseudomonadales	Proteobacteria	Acinetobacter	Gammaproteobacteria	Moraxellaceae
4	A. muciniphila	Community C	2.48e-06	45	0.851485	A. muciniphila	Verrucomicrobiales	Verrucomicrobia	Akkermansia	Verrucomicrobiae	Akkermansiaceae
5	Akkermansia sp.	Community E	1.88e-06	7	0.524752	Akkermansia sp.	Verrucomicrobiales	Verrucomicrobia	Akkermansia	Verrucomicrobiae	Akkermansiaceae
6	A. finegoldii	Community H	1.28e-06	51	0.544554	A. finegoldii	Bacteroidales	Bacteroidetes	Alistipes	Bacteroidia	Rikenellaceae
7	7		3.6e-07	26	0.732673		Bacteroidales	Bacteroidetes	Alistipes	Bacteroidia	Rikenellaceae
8	A. obesi		7.7e-07	64	0.49505	A. obesi	Bacteroidales	Bacteroidetes	Alistipes	Bacteroidia	Rikenellaceae
9	A. onderdonkii	Community F	2.42e-06	67	0.80198	A. onderdonkii	Bacteroidales	Bacteroidetes	Alistipes	Bacteroidia	Rikenellaceae
10	A. putredinis		5.09e-06	78	0.683168	A. putredinis	Bacteroidales	Bacteroidetes	Alistipes	Bacteroidia	Rikenellaceae
11	A. shahii		8.4e-07	73	0.336634	A. shahii	Bacteroidales	Bacteroidetes	Alistipes	Bacteroidia	Rikenellaceae
12	Alistipes sp.		1.52e-06	34	0.475248	Alistipes sp.	Bacteroidales	Bacteroidetes	Alistipes	Bacteroidia	Rikenellaceae
13	Alistipes sp.	Species out of the graph	3.92e-06	18	0.80198	Alistipes sp.	Bacteroidales	Bacteroidetes	Alistipes	Bacteroidia	Rikenellaceae
14	Alistipes uncl.		6.16e-06	6	0.326733	Alistipes uncl.	Bacteroidales	Bacteroidetes	Alistipes	Bacteroidia	Rikenellaceae
15			6.2e-07	21	0.524752		Bacteroidales	Bacteroidetes	Alistipes	Bacteroidia	Rikenellaceae
16	Alistipes uncl.		6.82e-06	8	0.742574	Alistipes uncl.	Bacteroidales	Bacteroidetes	Alistipes	Bacteroidia	Rikenellaceae
17	Alistipes sp.	Community E	1.027e-05	14	0.722772	Alistipes sp.	Bacteroidales	Bacteroidetes	Alistipes	Bacteroidia	Rikenellaceae
18	Alistipes sp.	Community E	1.077e-05	6	0.732673	Alistipes sp.	Bacteroidales	Bacteroidetes	Alistipes	Bacteroidia	Rikenellaceae
19	A. hadrus	Community A	1.01e-06	87	0.960396	A. hadrus	Clostridiales	Firmicutes	Anaerostipes	Clostridia	Lachnospiraceae
20	Anaerotruncus sp.	Community L	1.49e-06	15	0.613861	Anaerotruncus sp.	Clostridiales	Firmicutes	Anaerotruncus	Clostridia	Ruminococcaceae
21	Anaerotruncus sp.		4.47e-06	6	0.534653	Anaerotruncus sp.	Clostridiales	Firmicutes	Anaerotruncus	Clostridia	Ruminococcaceae
22	Azospirillum sp.		5.76e-06	26	0.366337	Azospirillum sp.	Rhodospirillales	Proteobacteria	Azospirillum	Alphaproteobacteria	Rhodospirillaceae
23	Azospirillum sp.		2.06e-06	24	0.653465	Azospirillum sp.	Rhodospirillales	Proteobacteria	Azospirillum	Alphaproteobacteria	Rhodospirillaceae
24	Bacteroidales uncl.	Community Q	1.3e-06	13	0.643564	Bacteroidales uncl.	Bacteroidales	Bacteroidetes	unclassified Bacteroidales	Bacteroidia	unclassified Bacteroidales
25	B. caccae		1.76e-06	66	0.653465	B. caccae	Bacteroidales	Bacteroidetes	Bacteroides	Bacteroidia	Bacteroidaceae
26	B. cellulosilyticus	Community G	2.82e-06	48	0.633663	B. cellulosilyticus	Bacteroidales	Bacteroidetes	Bacteroides	Bacteroidia	Bacteroidaceae
27	B. clarus		1.52e-06	20	0.653465	B. clarus	Bacteroidales	Bacteroidetes	Bacteroides	Bacteroidia	Bacteroidaceae
28	B. coprocola	Community G	5.57e-06	14	0.485149	B. coprocola	Bacteroidales	Bacteroidetes	Bacteroides	Bacteroidia	Bacteroidaceae
29	B. coprophilus	Community D	4.47e-06	11	0.514852	B. coprophilus	Bacteroidales	Bacteroidetes	Bacteroides	Bacteroidia	Bacteroidaceae
30	B. dorei	Community A	7.2e-06	67	0.762376	B. dorei	Bacteroidales	Bacteroidetes	Bacteroides	Bacteroidia	Bacteroidaceae
31	B. eggerthii	Species out of the graph	5.12e-06	24	0.960396	B. eggerthii	Bacteroidales	Bacteroidetes	Bacteroides	Bacteroidia	Bacteroidaceae
32	B. faecis	Species out of the graph	2.19e-06	18	0.950495	B. faecis	Bacteroidales	Bacteroidetes	Bacteroides	Bacteroidia	Bacteroidaceae
33	B. finegoldii		1.34e-06	20	0.435644	B. finegoldii	Bacteroidales	Bacteroidetes	Bacteroides	Bacteroidia	Bacteroidaceae
34	B. fragilis	Community F	1.96e-06	42	0.623762	B. fragilis	Bacteroidales	Bacteroidetes	Bacteroides	Bacteroidia	Bacteroidaceae
35	B. intestinalis	Community G	2.34e-06	12	0.732673	B. intestinalis	Bacteroidales	Bacteroidetes	Bacteroides	Bacteroidia	Bacteroidaceae
36	B. massiliensis	Species out of the graph	4.07e-06	29	0.851485	B. massiliensis	Bacteroidales	Bacteroidetes	Bacteroides	Bacteroidia	Bacteroidaceae
37	B. ovatus	Community A	2.29e-06	88	0.742574	B. ovatus	Bacteroidales	Bacteroidetes	Bacteroides	Bacteroidia	Bacteroidaceae
38	B. pectinophilus	Community N	2.36e-06	8	0.871287	B. pectinophilus	Clostridiales	Firmicutes	unclassified Clostridiales	Clostridia	unclassified Clostridiales
39	B. plebeius	Community G	4.78e-06	19	0.514852	B. plebeius	Bacteroidales	Bacteroidetes	Bacteroides	Bacteroidia	Bacteroidaceae
40	B. salyersiae	Species out of the graph	1.32e-06	12	0.722772	B. salyersiae	Bacteroidales	Bacteroidetes	Bacteroides	Bacteroidia	Bacteroidaceae
41	Bacteroides sp.		1.06e-06	18	0.673267	Bacteroides sp.	Bacteroidales	Bacteroidetes	Bacteroides	Bacteroidia	Bacteroidaceae
42	Bacteroides sp.	Species out of the graph	6.98e-06	10	0.752475	Bacteroides sp.	Bacteroidales	Bacteroidetes	Bacteroides	Bacteroidia	Bacteroidaceae
43	Bacteroides sp.	Community N	4.39e-06	6	0.732673	Bacteroides sp.	Bacteroidales	Bacteroidetes	Bacteroides	Bacteroidia	Bacteroidaceae
44	Bacteroides sp.		1.052e-05	7	0.663366	Bacteroides sp.	Bacteroidales	Bacteroidetes	Bacteroides	Bacteroidia	Bacteroidaceae
45	Bacteroides sp.		4.7e-06	6	0.336634	Bacteroides sp.	Bacteroidales	Bacteroidetes	Bacteroides	Bacteroidia	Bacteroidaceae
46	B. stercoris	Species out of the graph	5.36e-06	30	0.871287	B. stercoris	Bacteroidales	Bacteroidetes	Bacteroides	Bacteroidia	Bacteroidaceae
47	B. thetaiotaomicron	Community F	1.66e-06	68	0.594059	B. thetaiotaomicron	Bacteroidales	Bacteroidetes	Bacteroides	Bacteroidia	Bacteroidaceae
48	B. uniformis	Community A	9.77e-06	94	0.742574	B. uniformis	Bacteroidales	Bacteroidetes	Bacteroides	Bacteroidia	Bacteroidaceae
49	B. vulgatus	Community A	9.82e-06	96	0.742574	B. vulgatus	Bacteroidales	Bacteroidetes	Bacteroides	Bacteroidia	Bacteroidaceae
50	B. xylanisolvens	Community A	1.79e-06	59	0.742574	B. xylanisolvens	Bacteroidales	Bacteroidetes	Bacteroides	Bacteroidia	Bacteroidaceae
51	B. intestinihominis		2.57e-06	79	0.683168	B. intestinihominis	Bacteroidales	Bacteroidetes	Barnesiella	Bacteroidia	Porphyromonadaceae
52	B. adolescentis	Community P	1.14e-06	67	0.673267	B. adolescentis	Bifidobacteriales	Actinobacteria	Bifidobacterium	Actinobacteria	Bifidobacteriaceae
53	53	Community P	6.1e-07	56	0.742574		Bifidobacteriales	Actinobacteria	Bifidobacterium	Actinobacteria	Bifidobacteriaceae
54	54	Community A	4.3e-07	46	0.841584		Desulfovibrionales	Proteobacteria	Bilophila	Deltaproteobacteria	Desulfovibrionaceae
55			2.3e-07	42	0.792079		Clostridiales	Firmicutes	Blautia	Clostridia	Lachnospiraceae
56			6.2e-07	17	0.514852		Clostridiales	Firmicutes	Blautia	Clostridia	Lachnospiraceae
57	Blautia uncl.		6.8e-07	15	0.504951	Blautia uncl.	Clostridiales	Firmicutes	Blautia	Clostridia	Lachnospiraceae
58	Blautia sp.	Community A	1.42e-06	95	0.960396	Blautia sp.	Clostridiales	Firmicutes	Blautia	Clostridia	Lachnospiraceae
59	59	Community A	3.4e-07	55	0.792079		Clostridiales	Firmicutes	Blautia	Clostridia	Lachnospiraceae
60	60	Community A	5.1e-07	85	0.950495		Clostridiales	Firmicutes	Blautia	Clostridia	Lachnospiraceae
61	B. wexlerae	Community A	1.09e-06	98	0.960396	B. wexlerae	Clostridiales	Firmicutes	Blautia	Clostridia	Lachnospiraceae
62	B. aalborgi		1.83e-06	6	0.415842	B. aalborgi	Brachyspirales	Spirochaetes	Brachyspira	Spirochaetia	Brachyspiraceae
63	Burkholderiales uncl.		1.86e-06	9	0.70297	Burkholderiales uncl.	Burkholderiales	Proteobacteria	unclassified Burkholderiales	Betaproteobacteria	unclassified Burkholderiales
64	Burkholderiales uncl.	Community N	1.28e-06	12	0.831683	Burkholderiales uncl.	Burkholderiales	Proteobacteria	unclassified Burkholderiales	Betaproteobacteria	unclassified Burkholderiales
65		Species out of the graph	3.6e-07	38	0.950495		Bacteroidales	Bacteroidetes	Butyricimonas	Bacteroidia	Odoribacteraceae
66	B. crossotus		1.587e-05	28	0.376238	B. crossotus	Clostridiales	Firmicutes	Butyrivibrio	Clostridia	Lachnospiraceae
67	Butyrivibrio sp.		4.48e-06	12	0.554455	Butyrivibrio sp.	Clostridiales	Firmicutes	Butyrivibrio	Clostridia	Lachnospiraceae
68			1.97e-06	7	0.663366		unclassified	unclassified	unclassified	unclassified	unclassified
69	69	Community O	1.97e-06	26	0.891089		unclassified	unclassified	unclassified	unclassified	unclassified
70			4.4e-07	26	0.584158		unclassified	unclassified	unclassified	unclassified	unclassified
71	71	Community E	4.8e-07	22	0.574257		unclassified	unclassified	unclassified	unclassified	unclassified
72	72	Community E	1.13e-06	15	0.742574		unclassified	unclassified	unclassified	unclassified	unclassified
73			4.9e-07	25	0.247525		unclassified	unclassified	unclassified	unclassified	unclassified
74			4.2e-07	25	0.455446		unclassified	unclassified	unclassified	unclassified	unclassified
75			4.8e-07	33	0.425743		Bacteroidales	Bacteroidetes	Alistipes	Bacteroidia	Rikenellaceae
76	Catenibacterium sp.		1.15e-06	20	0.554455	Catenibacterium sp.	Erysipelotrichales	Firmicutes	Catenibacterium	Erysipelotrichia	Erysipelotrichaceae
77	Clostridiales uncl.		1.33e-06	11	0.881188	Clostridiales uncl.	Clostridiales	Firmicutes	unclassified Clostridiales	Clostridia	unclassified Clostridiales
78			4.4e-07	49	0.504951		Clostridiales	Firmicutes	unclassified Clostridiales	Clostridia	unclassified Clostridiales
79	Clostridiales uncl.	Community K	6.09e-06	6	0.584158	Clostridiales uncl.	Clostridiales	Firmicutes	unclassified Clostridiales	Clostridia	unclassified Clostridiales
80	80	Community Q	2e-07	46	0.693069		Clostridiales	Firmicutes	unclassified Clostridiales	Clostridia	unclassified Clostridiales
81			6e-07	38	0.306931		Clostridiales	Firmicutes	unclassified Clostridiales	Clostridia	unclassified Clostridiales
82	Clostridium sp.		4.64e-06	48	0.386139	Clostridium sp.	Clostridiales	Firmicutes	unclassified Clostridiales	Clostridia	unclassified Clostridiales
83	Clostridium sp.	Community C	1.49e-06	49	0.821782	Clostridium sp.	Clostridiales	Firmicutes	unclassified Clostridiales	Clostridia	unclassified Clostridiales
84	Clostridium sp.	Community B	6.5e-07	33	0.891089	Clostridium sp.	Clostridiales	Firmicutes	unclassified Clostridiales	Clostridia	unclassified Clostridiales
85	85	Community A	4.4e-07	24	0.752475		Clostridiales	Firmicutes	unclassified Clostridiales	Clostridia	unclassified Clostridiales
86			3.8e-07	25	0.465347		Clostridiales	Firmicutes	unclassified Clostridiales	Clostridia	unclassified Clostridiales
87	Clostridium sp.		1.32e-06	32	0.455446	Clostridium sp.	Clostridiales	Firmicutes	unclassified Clostridiales	Clostridia	unclassified Clostridiales
88	Clostridium sp.	Community C	1.38e-06	30	0.534653	Clostridium sp.	Clostridiales	Firmicutes	unclassified Clostridiales	Clostridia	unclassified Clostridiales
89	Clostridium sp.	Species out of the graph	1.19e-06	49	0.871287	Clostridium sp.	Clostridiales	Firmicutes	unclassified Clostridiales	Clostridia	unclassified Clostridiales
90	Clostridium sp.	Community B	7.6e-07	20	0.930693	Clostridium sp.	Clostridiales	Firmicutes	unclassified Clostridiales	Clostridia	unclassified Clostridiales
91	Clostridium sp.	Community K	3.12e-06	15	0.574257	Clostridium sp.	Clostridiales	Firmicutes	unclassified Clostridiales	Clostridia	unclassified Clostridiales
92	Clostridium sp.		1.23e-06	33	0.386139	Clostridium sp.	Clostridiales	Firmicutes	unclassified Clostridiales	Clostridia	unclassified Clostridiales
93	Clostridium sp.	Community A	7.9e-07	29	0.950495	Clostridium sp.	Clostridiales	Firmicutes	unclassified Clostridiales	Clostridia	unclassified Clostridiales
94	Clostridium sp.		8.6e-07	18	0.445545	Clostridium sp.	Clostridiales	Firmicutes	unclassified Clostridiales	Clostridia	unclassified Clostridiales
95	Clostridium sp.	Community E	1.65e-06	27	0.722772	Clostridium sp.	Clostridiales	Firmicutes	unclassified Clostridiales	Clostridia	unclassified Clostridiales
96	Clostridium sp.	Community I	1.65e-06	26	0.643564	Clostridium sp.	Clostridiales	Firmicutes	unclassified Clostridiales	Clostridia	unclassified Clostridiales
97	Clostridium sp.	Community O	7.6e-07	17	0.831683	Clostridium sp.	Clostridiales	Firmicutes	unclassified Clostridiales	Clostridia	unclassified Clostridiales
98	Clostridium sp.	Community I	3.42e-06	20	0.405941	Clostridium sp.	Clostridiales	Firmicutes	unclassified Clostridiales	Clostridia	unclassified Clostridiales
99	Clostridium sp.	Species out of the graph	2.49e-06	23	0.950495	Clostridium sp.	Clostridiales	Firmicutes	unclassified Clostridiales	Clostridia	unclassified Clostridiales
100	Clostridium sp.	Community E	2.93e-06	16	0.653465	Clostridium sp.	Clostridiales	Firmicutes	unclassified Clostridiales	Clostridia	unclassified Clostridiales
101	Clostridium sp.		2.73e-06	13	0.544554	Clostridium sp.	Clostridiales	Firmicutes	unclassified Clostridiales	Clostridia	unclassified Clostridiales
102	Clostridium sp.	Species out of the graph	1.85e-06	24	0.752475	Clostridium sp.	Clostridiales	Firmicutes	unclassified Clostridiales	Clostridia	unclassified Clostridiales
103	Clostridium sp.	Community K	1e-06	18	0.762376	Clostridium sp.	Clostridiales	Firmicutes	unclassified Clostridiales	Clostridia	unclassified Clostridiales
104	Clostridiales uncl.	Community K	9.5e-07	11	0.504951	Clostridiales uncl.	Clostridiales	Firmicutes	unclassified Clostridiales	Clostridia	unclassified Clostridiales
105	Clostridiales uncl.		8.2e-07	15	0.623762	Clostridiales uncl.	Clostridiales	Firmicutes	unclassified Clostridiales	Clostridia	unclassified Clostridiales
106	Clostridium sp.		1.21e-06	8	0.405941	Clostridium sp.	Clostridiales	Firmicutes	unclassified Clostridiales	Clostridia	unclassified Clostridiales
107	Clostridium sp.	Community E	3.6e-06	10	0.60396	Clostridium sp.	Clostridiales	Firmicutes	unclassified Clostridiales	Clostridia	unclassified Clostridiales
108	Clostridium sp.	Community K	1.03e-06	11	0.60396	Clostridium sp.	Clostridiales	Firmicutes	unclassified Clostridiales	Clostridia	unclassified Clostridiales
109	Clostridium sp.	Community A	8.9e-07	84	0.772277	Clostridium sp.	Clostridiales	Firmicutes	unclassified Clostridiales	Clostridia	unclassified Clostridiales
110	Clostridium sp.	Community L	1.91e-06	15	0.633663	Clostridium sp.	Clostridiales	Firmicutes	unclassified Clostridiales	Clostridia	unclassified Clostridiales
111	Clostridium sp.		1.07e-06	11	0.257426	Clostridium sp.	Clostridiales	Firmicutes	unclassified Clostridiales	Clostridia	unclassified Clostridiales
112	Clostridium sp.		1.18e-06	10	0.742574	Clostridium sp.	Clostridiales	Firmicutes	unclassified Clostridiales	Clostridia	unclassified Clostridiales
113	Clostridium sp.	Community I	4.45e-06	13	0.504951	Clostridium sp.	Clostridiales	Firmicutes	unclassified Clostridiales	Clostridia	unclassified Clostridiales
114	Clostridium sp.		5.72e-06	8	0.683168	Clostridium sp.	Clostridiales	Firmicutes	unclassified Clostridiales	Clostridia	unclassified Clostridiales
115	Clostridium sp.		7.8e-07	13	0.386139	Clostridium sp.	Clostridiales	Firmicutes	unclassified Clostridiales	Clostridia	unclassified Clostridiales
116	Clostridium sp.	Community K	1.4e-06	14	1	Clostridium sp.	Clostridiales	Firmicutes	unclassified Clostridiales	Clostridia	unclassified Clostridiales
117	Clostridium sp.	Community E	3.52e-06	18	0.633663	Clostridium sp.	Clostridiales	Firmicutes	unclassified Clostridiales	Clostridia	unclassified Clostridiales
118	Clostridium sp.	Community L	6.1e-06	8	0.574257	Clostridium sp.	Clostridiales	Firmicutes	unclassified Clostridiales	Clostridia	unclassified Clostridiales
119	Clostridium sp.	Community E	4.74e-06	15	0.792079	Clostridium sp.	Clostridiales	Firmicutes	unclassified Clostridiales	Clostridia	unclassified Clostridiales
120	Clostridium sp.	Community L	1.69e-06	11	0.663366	Clostridium sp.	Clostridiales	Firmicutes	unclassified Clostridiales	Clostridia	unclassified Clostridiales
121	Clostridium sp.	Community K	4.41e-06	11	0.485149	Clostridium sp.	Clostridiales	Firmicutes	unclassified Clostridiales	Clostridia	unclassified Clostridiales
122	122	Community A	3.7e-07	26	0.742574		Clostridiales	Firmicutes	unclassified Clostridiales	Clostridia	unclassified Clostridiales
123	Clostridium sp.	Species out of the graph	1.15e-06	72	0.821782	Clostridium sp.	Clostridiales	Firmicutes	unclassified Clostridiales	Clostridia	unclassified Clostridiales
124	Clostridium sp.		3.69e-06	12	0.29703	Clostridium sp.	Clostridiales	Firmicutes	unclassified Clostridiales	Clostridia	unclassified Clostridiales
125	Clostridiales uncl.	Community L	3.2e-06	13	0.584158	Clostridiales uncl.	Clostridiales	Firmicutes	unclassified Clostridiales	Clostridia	unclassified Clostridiales
126	Clostridium sp.	Community A	9.8e-07	73	0.950495	Clostridium sp.	Clostridiales	Firmicutes	unclassified Clostridiales	Clostridia	unclassified Clostridiales
127	127	Community Q	2.8e-07	70	0.594059		Clostridiales	Firmicutes	unclassified Clostridiales	Clostridia	unclassified Clostridiales
128	Clostridium sp.	Community B	8.2e-07	52	0.821782	Clostridium sp.	Clostridiales	Firmicutes	unclassified Clostridiales	Clostridia	unclassified Clostridiales
129	Clostridium sp.		4.26e-06	6	0.49505	Clostridium sp.	Clostridiales	Firmicutes	unclassified Clostridiales	Clostridia	unclassified Clostridiales
130	Clostridiales uncl.	Community C	4.06e-06	25	0.663366	Clostridiales uncl.	Clostridiales	Firmicutes	unclassified Clostridiales	Clostridia	unclassified Clostridiales
131	Clostridium sp.		1.98e-06	85	0.663366	Clostridium sp.	Clostridiales	Firmicutes	unclassified Clostridiales	Clostridia	unclassified Clostridiales
132	Clostridium sp.	Community K	2.05e-06	27	0.574257	Clostridium sp.	Clostridiales	Firmicutes	unclassified Clostridiales	Clostridia	unclassified Clostridiales
133	133	Community A	6.4e-07	64	0.950495		Erysipelotrichales	Firmicutes	Coprobacillus	Erysipelotrichia	Erysipelotrichaceae
134	134	Community A	5.4e-07	25	0.920792		Erysipelotrichales	Firmicutes	Coprobacillus	Erysipelotrichia	Erysipelotrichaceae
135	Coprobacillus sp.		1.66e-06	6	0.316832	Coprobacillus sp.	Erysipelotrichales	Firmicutes	Coprobacillus	Erysipelotrichia	Erysipelotrichaceae
136			4.9e-07	38	0.683168		Bacteroidales	Bacteroidetes	Coprobacter	Bacteroidia	Porphyromonadaceae
137	137	Community Q	2.1e-07	61	0.712871		Clostridiales	Firmicutes	Coprococcus	Clostridia	Lachnospiraceae
138	C. comes		6.5e-07	92	0.39604	C. comes	Clostridiales	Firmicutes	Coprococcus	Clostridia	Lachnospiraceae
139	C. eutactus		4.83e-06	7	0.623762	C. eutactus	Clostridiales	Firmicutes	Coprococcus	Clostridia	Lachnospiraceae
140	Coprococcus sp.	Species out of the graph	4.47e-06	48	0.811881	Coprococcus sp.	Clostridiales	Firmicutes	Coprococcus	Clostridia	Lachnospiraceae
141			6.2e-07	27	0.376238		Desulfovibrionales	Proteobacteria	Desulfovibrio	Deltaproteobacteria	Desulfovibrionaceae
142	D. invisus	Community A	8.84e-06	28	0.712871	D. invisus	Veillonellales	Firmicutes	Dialister	Negativicutes	Veillonellaceae
143	Dialister sp.	Species out of the graph	4.64e-06	8	0.80198	Dialister sp.	Veillonellales	Firmicutes	Dialister	Negativicutes	Veillonellaceae
144	Dialister sp.		5.97e-06	9	0.554455	Dialister sp.	Veillonellales	Firmicutes	Dialister	Negativicutes	Veillonellaceae
145	D. succinatiphilus		4.69e-06	5	0.356436	D. succinatiphilus	Veillonellales	Firmicutes	Dialister	Negativicutes	Veillonellaceae
146	146	Community A	2.7e-07	84	0.891089		Clostridiales	Firmicutes	Dorea	Clostridia	Lachnospiraceae
147	D. longicatena		7.4e-07	84	0.39604	D. longicatena	Clostridiales	Firmicutes	Dorea	Clostridia	Lachnospiraceae
148			2.9e-07	33	0.386139		Clostridiales	Firmicutes	Dorea	Clostridia	Lachnospiraceae
149			3.6e-07	39	0.376238		Eggerthellales	Actinobacteria	Eggerthella	Coriobacteriia	Eggerthellaceae
150	E. coli		3.24e-06	20	0.534653	E. coli	Enterobacteriales	Proteobacteria	Escherichia	Gammaproteobacteria	Enterobacteriaceae
151			3.3e-07	65	0.554455		Clostridiales	Firmicutes	Eubacterium	Clostridia	Eubacteriaceae
152	E. eligens		3.19e-06	79	0.415842	E. eligens	Clostridiales	Firmicutes	Eubacterium	Clostridia	Eubacteriaceae
153	153	Community A	4.3e-07	84	0.960396		Clostridiales	Firmicutes	Eubacterium	Clostridia	Eubacteriaceae
154			2.3e-07	36	0.326733		Clostridiales	Firmicutes	Eubacterium	Clostridia	Eubacteriaceae
155	E. rectale		5.99e-06	91	0.39604	E. rectale	Clostridiales	Firmicutes	Eubacterium	Clostridia	Eubacteriaceae
156	E. siraeum	Species out of the graph	2.27e-06	56	0.920792	E. siraeum	Clostridiales	Firmicutes	Ruminiclostridium	Clostridia	Ruminococcaceae
157	Ruminiclostridium uncl.	Community E	3.77e-06	7	0.70297	Ruminiclostridium uncl.	Clostridiales	Firmicutes	Ruminiclostridium	Clostridia	Ruminococcaceae
158	Ruminiclostridium uncl.	Species out of the graph	4.41e-06	7	0.732673	Ruminiclostridium uncl.	Clostridiales	Firmicutes	Ruminiclostridium	Clostridia	Ruminococcaceae
159	Eubacterium sp.		1.15e-06	45	0.80198	Eubacterium sp.	Clostridiales	Firmicutes	Eubacterium	Clostridia	Eubacteriaceae
160	Eubacterium sp.	Species out of the graph	5.99e-06	35	0.910891	Eubacterium sp.	Clostridiales	Firmicutes	Eubacterium	Clostridia	Eubacteriaceae
161	Eubacterium sp.	Species out of the graph	7.99e-06	28	0.930693	Eubacterium sp.	Clostridiales	Firmicutes	Eubacterium	Clostridia	Eubacteriaceae
162	Eubacterium sp.	Species out of the graph	1.44e-06	24	0.80198	Eubacterium sp.	Clostridiales	Firmicutes	Eubacterium	Clostridia	Eubacteriaceae
163	Eubacterium sp.	Species out of the graph	1.49e-06	20	0.752475	Eubacterium sp.	Clostridiales	Firmicutes	Eubacterium	Clostridia	Eubacteriaceae
164	Eubacterium sp.		1.56e-06	11	0.366337	Eubacterium sp.	Clostridiales	Firmicutes	Eubacterium	Clostridia	Eubacteriaceae
165	165	Community A	4.2e-07	34	0.940594		Clostridiales	Firmicutes	Eubacterium	Clostridia	Eubacteriaceae
166	Eubacterium sp.		1.02e-06	67	0.485149	Eubacterium sp.	Clostridiales	Firmicutes	Eubacterium	Clostridia	Eubacteriaceae
167	Eubacterium sp.		2.59e-06	6	0.336634	Eubacterium sp.	Clostridiales	Firmicutes	Eubacterium	Clostridia	Eubacteriaceae
168	Eubacterium sp.	Community B	3.02e-06	64	0.940594	Eubacterium sp.	Clostridiales	Firmicutes	Eubacterium	Clostridia	Eubacteriaceae
169	Eubacterium sp.		1.25e-06	60	0.425743	Eubacterium sp.	Clostridiales	Firmicutes	Eubacterium	Clostridia	Eubacteriaceae
170			4.6e-07	52	0.524752		Clostridiales	Firmicutes	Eubacterium	Clostridia	Eubacteriaceae
171	F. 5	Community C	3.7e-06	57	0.841584	F. 5	Clostridiales	Firmicutes	Faecalibacterium	Clostridia	Ruminococcaceae
172	172	Community B	5.1e-07	64	0.841584		Clostridiales	Firmicutes	Faecalibacterium	Clostridia	Ruminococcaceae
173	F. 8		3.22e-06	90	0.683168	F. 8	Clostridiales	Firmicutes	Faecalibacterium	Clostridia	Ruminococcaceae
174	F. prausnitzii	Community J	1.06e-06	73	0.554455	F. prausnitzii	Clostridiales	Firmicutes	Faecalibacterium	Clostridia	Ruminococcaceae
175	F. prausnitzii	Community J	1.48e-06	83	0.514852	F. prausnitzii	Clostridiales	Firmicutes	Faecalibacterium	Clostridia	Ruminococcaceae
176	Faecalibacterium uncl.		1.39e-06	36	0.405941	Faecalibacterium uncl.	Clostridiales	Firmicutes	Faecalibacterium	Clostridia	Ruminococcaceae
177	Faecalibacterium uncl.	Species out of the graph	1.85e-06	23	0.920792	Faecalibacterium uncl.	Clostridiales	Firmicutes	Faecalibacterium	Clostridia	Ruminococcaceae
178	F. prausnitzii	Community B	1.34e-06	79	0.891089	F. prausnitzii	Clostridiales	Firmicutes	Faecalibacterium	Clostridia	Ruminococcaceae
179	Faecalibacterium uncl.		8.4e-07	49	0.60396	Faecalibacterium uncl.	Clostridiales	Firmicutes	Faecalibacterium	Clostridia	Ruminococcaceae
180	F. prausnitzii	Community B	1.26e-06	86	0.910891	F. prausnitzii	Clostridiales	Firmicutes	Faecalibacterium	Clostridia	Ruminococcaceae
181	Faecalibacterium uncl.		2.04e-06	24	0.653465	Faecalibacterium uncl.	Clostridiales	Firmicutes	Faecalibacterium	Clostridia	Ruminococcaceae
182	Faecalibacterium uncl.	Community J	1.08e-06	83	0.60396	Faecalibacterium uncl.	Clostridiales	Firmicutes	Faecalibacterium	Clostridia	Ruminococcaceae
183			6e-07	53	0.346535		Clostridiales	Firmicutes	Faecalibacterium	Clostridia	Ruminococcaceae
184	184	Community E	4.4e-07	24	0.742574		unclassified Firmicutes	Firmicutes	unclassified Firmicutes	unclassified Firmicutes	unclassified Firmicutes
185			3.2e-07	40	0.752475		unclassified Firmicutes	Firmicutes	unclassified Firmicutes	unclassified Firmicutes	unclassified Firmicutes
186	Firmicutes uncl.	Community E	9.4e-07	26	0.693069	Firmicutes uncl.	unclassified Firmicutes	Firmicutes	unclassified Firmicutes	unclassified Firmicutes	unclassified Firmicutes
187	Firmicutes uncl.	Community C	1.48e-06	47	0.851485	Firmicutes uncl.	unclassified Firmicutes	Firmicutes	unclassified Firmicutes	unclassified Firmicutes	unclassified Firmicutes
188	188	Community C	5.6e-07	51	0.851485		unclassified Firmicutes	Firmicutes	unclassified Firmicutes	unclassified Firmicutes	unclassified Firmicutes
189	189	Community H	4.9e-07	54	0.623762		unclassified Firmicutes	Firmicutes	unclassified Firmicutes	unclassified Firmicutes	unclassified Firmicutes
190	190	Community C	6.2e-07	48	0.851485		unclassified Firmicutes	Firmicutes	unclassified Firmicutes	unclassified Firmicutes	unclassified Firmicutes
191	191	Community E	5.2e-07	23	0.584158		unclassified Firmicutes	Firmicutes	unclassified Firmicutes	unclassified Firmicutes	unclassified Firmicutes
192	192	Community E	3.6e-07	27	0.60396		unclassified Firmicutes	Firmicutes	unclassified Firmicutes	unclassified Firmicutes	unclassified Firmicutes
193	Firmicutes uncl.	Community C	1.02e-06	52	0.851485	Firmicutes uncl.	unclassified Firmicutes	Firmicutes	unclassified Firmicutes	unclassified Firmicutes	unclassified Firmicutes
194	194	Community E	3e-07	32	0.643564		unclassified Firmicutes	Firmicutes	unclassified Firmicutes	unclassified Firmicutes	unclassified Firmicutes
195	195	Community E	4e-07	47	0.732673		unclassified Firmicutes	Firmicutes	unclassified Firmicutes	unclassified Firmicutes	unclassified Firmicutes
196			6.3e-07	40	0.39604		unclassified Firmicutes	Firmicutes	unclassified Firmicutes	unclassified Firmicutes	unclassified Firmicutes
197	F. bacterium	Community M	1.18e-06	50	0.851485	F. bacterium	unclassified Firmicutes	Firmicutes	unclassified Firmicutes	unclassified Firmicutes	unclassified Firmicutes
198	Firmicutes uncl.	Species out of the graph	7.4e-07	32	0.732673	Firmicutes uncl.	unclassified Firmicutes	Firmicutes	unclassified Firmicutes	unclassified Firmicutes	unclassified Firmicutes
199	F. bacterium	Community C	1.07e-06	55	0.841584	F. bacterium	unclassified Firmicutes	Firmicutes	unclassified Firmicutes	unclassified Firmicutes	unclassified Firmicutes
200	F. bacterium		1.13e-06	44	0.574257	F. bacterium	unclassified Firmicutes	Firmicutes	unclassified Firmicutes	unclassified Firmicutes	unclassified Firmicutes
201	Firmicutes uncl.	Community C	1.11e-06	55	0.851485	Firmicutes uncl.	unclassified Firmicutes	Firmicutes	unclassified Firmicutes	unclassified Firmicutes	unclassified Firmicutes
202	Firmicutes uncl.	Community C	9.9e-07	64	0.851485	Firmicutes uncl.	unclassified Firmicutes	Firmicutes	unclassified Firmicutes	unclassified Firmicutes	unclassified Firmicutes
203			2.8e-07	43	0.386139		unclassified Firmicutes	Firmicutes	unclassified Firmicutes	unclassified Firmicutes	unclassified Firmicutes
204	F. bacterium	Community C	1.02e-06	71	0.851485	F. bacterium	unclassified Firmicutes	Firmicutes	unclassified Firmicutes	unclassified Firmicutes	unclassified Firmicutes
205	205	Community E	6.3e-07	23	0.683168		unclassified Firmicutes	Firmicutes	unclassified Firmicutes	unclassified Firmicutes	unclassified Firmicutes
206	F. bacterium	Community C	2.56e-06	59	0.851485	F. bacterium	unclassified Firmicutes	Firmicutes	unclassified Firmicutes	unclassified Firmicutes	unclassified Firmicutes
207	Firmicutes uncl.		9.5e-07	13	0.356436	Firmicutes uncl.	unclassified Firmicutes	Firmicutes	unclassified Firmicutes	unclassified Firmicutes	unclassified Firmicutes
208	Firmicutes uncl.	Species out of the graph	7.3e-07	36	0.851485	Firmicutes uncl.	unclassified Firmicutes	Firmicutes	unclassified Firmicutes	unclassified Firmicutes	unclassified Firmicutes
209	Firmicutes uncl.		9e-07	26	0.316832	Firmicutes uncl.	unclassified Firmicutes	Firmicutes	unclassified Firmicutes	unclassified Firmicutes	unclassified Firmicutes
210	Firmicutes uncl.		1.57e-06	8	0.386139	Firmicutes uncl.	unclassified Firmicutes	Firmicutes	unclassified Firmicutes	unclassified Firmicutes	unclassified Firmicutes
211	F. bacterium		1.35e-06	27	0.207921	F. bacterium	unclassified Firmicutes	Firmicutes	unclassified Firmicutes	unclassified Firmicutes	unclassified Firmicutes
212	F. bacterium	Community E	7.1e-07	29	0.693069	F. bacterium	unclassified Firmicutes	Firmicutes	unclassified Firmicutes	unclassified Firmicutes	unclassified Firmicutes
213	F. bacterium	Community B	1.58e-06	86	0.950495	F. bacterium	unclassified Firmicutes	Firmicutes	unclassified Firmicutes	unclassified Firmicutes	unclassified Firmicutes
214	F. bacterium	Community C	1.72e-06	42	0.851485	F. bacterium	unclassified Firmicutes	Firmicutes	unclassified Firmicutes	unclassified Firmicutes	unclassified Firmicutes
215	Firmicutes uncl.	Community E	5.23e-06	5	0.455446	Firmicutes uncl.	unclassified Firmicutes	Firmicutes	unclassified Firmicutes	unclassified Firmicutes	unclassified Firmicutes
216		Species out of the graph	4.9e-07	38	0.980198		unclassified Firmicutes	Firmicutes	unclassified Firmicutes	unclassified Firmicutes	unclassified Firmicutes
217	F. bacterium	Community E	3.22e-06	25	0.712871	F. bacterium	unclassified Firmicutes	Firmicutes	unclassified Firmicutes	unclassified Firmicutes	unclassified Firmicutes
218	F. bacterium	Community I	2.41e-06	30	0.613861	F. bacterium	unclassified Firmicutes	Firmicutes	unclassified Firmicutes	unclassified Firmicutes	unclassified Firmicutes
219	Firmicutes uncl.		1.19e-06	14	0.356436	Firmicutes uncl.	unclassified Firmicutes	Firmicutes	unclassified Firmicutes	unclassified Firmicutes	unclassified Firmicutes
220	F. bacterium		1.3e-06	21	0.485149	F. bacterium	unclassified Firmicutes	Firmicutes	unclassified Firmicutes	unclassified Firmicutes	unclassified Firmicutes
221	F. bacterium		2.06e-06	27	0.237624	F. bacterium	unclassified Firmicutes	Firmicutes	unclassified Firmicutes	unclassified Firmicutes	unclassified Firmicutes
222	222	Community B	4.8e-07	77	0.90099		unclassified Firmicutes	Firmicutes	unclassified Firmicutes	unclassified Firmicutes	unclassified Firmicutes
223	F. bacterium	Community L	3.9e-06	15	0.623762	F. bacterium	unclassified Firmicutes	Firmicutes	unclassified Firmicutes	unclassified Firmicutes	unclassified Firmicutes
224	Firmicutes uncl.	Community L	1.39e-06	9	0.435644	Firmicutes uncl.	unclassified Firmicutes	Firmicutes	unclassified Firmicutes	unclassified Firmicutes	unclassified Firmicutes
225	F. bacterium	Community E	1.025e-05	12	0.594059	F. bacterium	unclassified Firmicutes	Firmicutes	unclassified Firmicutes	unclassified Firmicutes	unclassified Firmicutes
226	F. bacterium	Community E	2.94e-06	13	0.772277	F. bacterium	unclassified Firmicutes	Firmicutes	unclassified Firmicutes	unclassified Firmicutes	unclassified Firmicutes
227	F. bacterium		2.34e-06	6	0.346535	F. bacterium	unclassified Firmicutes	Firmicutes	unclassified Firmicutes	unclassified Firmicutes	unclassified Firmicutes
228	228	Community B	5.7e-07	67	0.980198		unclassified Firmicutes	Firmicutes	unclassified Firmicutes	unclassified Firmicutes	unclassified Firmicutes
229	F. bacterium		3.1e-06	93	0.663366	F. bacterium	unclassified Firmicutes	Firmicutes	unclassified Firmicutes	unclassified Firmicutes	unclassified Firmicutes
230	Firmicutes uncl.	Species out of the graph	1.4e-06	29	0.831683	Firmicutes uncl.	unclassified Firmicutes	Firmicutes	unclassified Firmicutes	unclassified Firmicutes	unclassified Firmicutes
231	Firmicutes uncl.		1.64e-06	20	0.70297	Firmicutes uncl.	unclassified Firmicutes	Firmicutes	unclassified Firmicutes	unclassified Firmicutes	unclassified Firmicutes
232	F. bacterium		7.6e-07	44	0.415842	F. bacterium	unclassified Firmicutes	Firmicutes	unclassified Firmicutes	unclassified Firmicutes	unclassified Firmicutes
233	233	Community A	4.9e-07	26	0.891089		Clostridiales	Firmicutes	Flavonifractor	Clostridia	unclassified Clostridiales
234	Fusobacterium sp.		1.57e-06	7	0.376238	Fusobacterium sp.	Fusobacteriales	Fusobacteria	Fusobacterium	Fusobacteriia	Fusobacteriaceae
235	H. parainfluenzae	Community B	7e-07	25	0.861386	H. parainfluenzae	Pasteurellales	Proteobacteria	Haemophilus	Gammaproteobacteria	Pasteurellaceae
236	H. biformis		1e-06	23	0.584158	H. biformis	Erysipelotrichales	Firmicutes	Holdemanella	Erysipelotrichia	Erysipelotrichaceae
237	Holdemanella uncl.		1.04e-06	34	0.70297	Holdemanella uncl.	Erysipelotrichales	Firmicutes	Holdemanella	Erysipelotrichia	Erysipelotrichaceae
238			2.5e-07	59	0.544554		Clostridiales	Firmicutes	Lachnoclostridium	Clostridia	Lachnospiraceae
239	Lachnospiraceae uncl.	Community A	1.17e-06	12	0.782178	Lachnospiraceae uncl.	Clostridiales	Firmicutes	unclassified Lachnospiraceae	Clostridia	Lachnospiraceae
240			3.1e-07	34	0.613861		Clostridiales	Firmicutes	unclassified Lachnospiraceae	Clostridia	Lachnospiraceae
241	241	Community B	4.7e-07	87	0.881188		Clostridiales	Firmicutes	unclassified Lachnospiraceae	Clostridia	Lachnospiraceae
242			3.6e-07	75	0.633663		Clostridiales	Firmicutes	unclassified Lachnospiraceae	Clostridia	Lachnospiraceae
243			2.5e-07	75	0.534653		Clostridiales	Firmicutes	unclassified Lachnospiraceae	Clostridia	Lachnospiraceae
244	M. smithii		6.9e-07	23	0.504951	M. smithii	Methanobacteriales	Euryarchaeota	Methanobrevibacter	Methanobacteria	Methanobacteriaceae
245	M. jalaludinii		1.81e-06	10	0.49505	M. jalaludinii	Selenomonadales	Firmicutes	Mitsuokella	Negativicutes	Selenomonadaceae
246	Mycoplasma sp.	Community I	3.37e-06	11	0.613861	Mycoplasma sp.	Mycoplasmatales	Tenericutes	Mycoplasma	Mollicutes	Mycoplasmataceae
247	Mycoplasma sp.	Community L	1.5e-06	11	0.60396	Mycoplasma sp.	Mycoplasmatales	Tenericutes	Mycoplasma	Mollicutes	Mycoplasmataceae
248	O. splanchnicus	Community F	9e-07	93	0.811881	O. splanchnicus	Bacteroidales	Bacteroidetes	Odoribacter	Bacteroidia	Odoribacteraceae
249	Oscillibacter uncl.		1.69e-06	6	0.386139	Oscillibacter uncl.	Clostridiales	Firmicutes	Oscillibacter	Clostridia	Oscillospiraceae
250	Oscillibacter uncl.	Community C	8.8e-07	30	0.60396	Oscillibacter uncl.	Clostridiales	Firmicutes	Oscillibacter	Clostridia	Oscillospiraceae
251	Oscillibacter uncl.		7e-07	25	0.564356	Oscillibacter uncl.	Clostridiales	Firmicutes	Oscillibacter	Clostridia	Oscillospiraceae
252	Oscillibacter uncl.	Community M	6.9e-07	72	0.930693	Oscillibacter uncl.	Clostridiales	Firmicutes	Oscillibacter	Clostridia	Oscillospiraceae
253	253	Community Q	2.5e-07	40	0.633663		Clostridiales	Firmicutes	Oscillibacter	Clostridia	Oscillospiraceae
254			3.6e-07	35	0.405941		Clostridiales	Firmicutes	Oscillibacter	Clostridia	Oscillospiraceae
255	255	Community H	6.3e-07	54	0.683168		Clostridiales	Firmicutes	Oscillibacter	Clostridia	Oscillospiraceae
256	Oscillibacter sp.		2.16e-06	26	0.465347	Oscillibacter sp.	Clostridiales	Firmicutes	Oscillibacter	Clostridia	Oscillospiraceae
257	Oscillibacter uncl.		1.4e-06	38	0.534653	Oscillibacter uncl.	Clostridiales	Firmicutes	Oscillibacter	Clostridia	Oscillospiraceae
258	258	Community A	5e-07	64	0.861386		Clostridiales	Firmicutes	Oscillibacter	Clostridia	Oscillospiraceae
259	P. distasonis	Community F	2.49e-06	86	0.712871	P. distasonis	Bacteroidales	Bacteroidetes	Parabacteroides	Bacteroidia	Porphyromonadaceae
260	P. merdae		1.41e-06	67	0.376238	P. merdae	Bacteroidales	Bacteroidetes	Parabacteroides	Bacteroidia	Porphyromonadaceae
261	P. clara	Species out of the graph	2.49e-06	40	0.821782	P. clara	Bacteroidales	Bacteroidetes	Paraprevotella	Bacteroidia	Prevotellaceae
262			6.3e-07	26	0.306931		Burkholderiales	Proteobacteria	Parasutterella	Betaproteobacteria	Sutterellaceae
263	Phascolarctobacterium sp.		4.15e-06	17	0.475248	Phascolarctobacterium sp.	Acidaminococcales	Firmicutes	Phascolarctobacterium	Negativicutes	Acidaminococcaceae
264	Phascolarctobacterium sp.		2.41e-06	24	0.504951	Phascolarctobacterium sp.	Acidaminococcales	Firmicutes	Phascolarctobacterium	Negativicutes	Acidaminococcaceae
265	P. succinatutens	Community D	3.04e-06	25	0.465347	P. succinatutens	Acidaminococcales	Firmicutes	Phascolarctobacterium	Negativicutes	Acidaminococcaceae
266	Prevotella uncl.	Species out of the graph	7.14e-06	24	0.80198	Prevotella uncl.	Bacteroidales	Bacteroidetes	Prevotella	Bacteroidia	Prevotellaceae
267	P. copri	Community D	3.245e-05	34	0.514852	P. copri	Bacteroidales	Bacteroidetes	Prevotella	Bacteroidia	Prevotellaceae
268	Prevotella uncl.		1.4e-05	5	0.39604	Prevotella uncl.	Bacteroidales	Bacteroidetes	Prevotella	Bacteroidia	Prevotellaceae
269	Prevotella uncl.		1.255e-05	6	0.435644	Prevotella uncl.	Bacteroidales	Bacteroidetes	Prevotella	Bacteroidia	Prevotellaceae
270	Prevotella sp.		1.118e-05	7	0.534653	Prevotella sp.	Bacteroidales	Bacteroidetes	Prevotella	Bacteroidia	Prevotellaceae
271	Prevotella sp.	Community N	7.12e-06	17	0.613861	Prevotella sp.	Bacteroidales	Bacteroidetes	Prevotella	Bacteroidia	Prevotellaceae
272	Prevotella sp.		3.116e-05	7	0.316832	Prevotella sp.	Bacteroidales	Bacteroidetes	Prevotella	Bacteroidia	Prevotellaceae
273	Prevotella sp.		3.8e-06	8	0.376238	Prevotella sp.	Bacteroidales	Bacteroidetes	Prevotella	Bacteroidia	Prevotellaceae
274	Prevotella sp.		6.61e-06	6	0.574257	Prevotella sp.	Bacteroidales	Bacteroidetes	Prevotella	Bacteroidia	Prevotellaceae
275	P. bacterium	Community A	1.25e-06	15	0.752475	P. bacterium	Burkholderiales	Proteobacteria	Parasutterella	Betaproteobacteria	Sutterellaceae
276	Rhodospirillales uncl.		1.45e-06	7	0.544554	Rhodospirillales uncl.	Rhodospirillales	Proteobacteria	unclassified Rhodospirillales	Alphaproteobacteria	unclassified Rhodospirillales
277			5.3e-07	56	0.475248		Clostridiales	Firmicutes	Roseburia	Clostridia	Lachnospiraceae
278	R. hominis	Species out of the graph	7.2e-07	71	0.950495	R. hominis	Clostridiales	Firmicutes	Roseburia	Clostridia	Lachnospiraceae
279	R. intestinalis	Community B	2.23e-06	67	0.990099	R. intestinalis	Clostridiales	Firmicutes	Roseburia	Clostridia	Lachnospiraceae
280	R. inulinivorans	Community B	1.54e-06	85	1	R. inulinivorans	Clostridiales	Firmicutes	Roseburia	Clostridia	Lachnospiraceae
281	Roseburia sp.		8.5e-07	30	0.514852	Roseburia sp.	Clostridiales	Firmicutes	Roseburia	Clostridia	Lachnospiraceae
282	Roseburia sp.	Community B	4.53e-06	86	0.920792	Roseburia sp.	Clostridiales	Firmicutes	Roseburia	Clostridia	Lachnospiraceae
283			6.1e-07	25	0.80198		Clostridiales	Firmicutes	Roseburia	Clostridia	Lachnospiraceae
284	Roseburia sp.		8.3e-07	40	0.544554	Roseburia sp.	Clostridiales	Firmicutes	Roseburia	Clostridia	Lachnospiraceae
285	Roseburia uncl.	Species out of the graph	7.2e-07	43	0.861386	Roseburia uncl.	Clostridiales	Firmicutes	Roseburia	Clostridia	Lachnospiraceae
286	Roseburia sp.		1.4e-06	11	0.574257	Roseburia sp.	Clostridiales	Firmicutes	Roseburia	Clostridia	Lachnospiraceae
287	Roseburia sp.	Species out of the graph	2.68e-06	56	0.881188	Roseburia sp.	Clostridiales	Firmicutes	Roseburia	Clostridia	Lachnospiraceae
288	288	Community A	3.7e-07	73	0.851485		Clostridiales	Firmicutes	unclassified Ruminococcaceae	Clostridia	Ruminococcaceae
289	R. bacterium	Community M	1.58e-06	82	0.920792	R. bacterium	Clostridiales	Firmicutes	unclassified Ruminococcaceae	Clostridia	Ruminococcaceae
290	Ruminococcaceae uncl.	Community E	7.4e-07	23	0.60396	Ruminococcaceae uncl.	Clostridiales	Firmicutes	unclassified Ruminococcaceae	Clostridia	Ruminococcaceae
291	R. bicirculans	Community H	2.65e-06	66	0.534653	R. bicirculans	Clostridiales	Firmicutes	Ruminococcus	Clostridia	Ruminococcaceae
292	R. bromii	Species out of the graph	3.92e-06	67	0.960396	R. bromii	Clostridiales	Firmicutes	Ruminococcus	Clostridia	Ruminococcaceae
293	R. gnavus	Community A	1.61e-06	11	0.782178	R. gnavus	Clostridiales	Firmicutes	Blautia	Clostridia	Lachnospiraceae
294		Species out of the graph	6.4e-07	61	1		Clostridiales	Firmicutes	Ruminococcus	Clostridia	Ruminococcaceae
295	295	Community A	5e-07	45	0.940594		Clostridiales	Firmicutes	Blautia	Clostridia	Lachnospiraceae
296	Ruminococcus sp.	Community C	3.38e-06	37	0.851485	Ruminococcus sp.	Clostridiales	Firmicutes	Ruminococcus	Clostridia	Ruminococcaceae
297	Ruminococcus uncl.		4.2e-06	7	0.643564	Ruminococcus uncl.	Clostridiales	Firmicutes	Ruminococcus	Clostridia	Ruminococcaceae
298			5.4e-07	26	0.455446		Clostridiales	Firmicutes	Ruminococcus	Clostridia	Ruminococcaceae
299	Ruminococcus sp.		2.08e-06	12	0.49505	Ruminococcus sp.	Clostridiales	Firmicutes	Ruminococcus	Clostridia	Ruminococcaceae
300	Ruminococcus sp.		1.69e-06	8	0.39604	Ruminococcus sp.	Clostridiales	Firmicutes	Ruminococcus	Clostridia	Ruminococcaceae
301			5.2e-07	18	0.693069		Clostridiales	Firmicutes	Ruminococcus	Clostridia	Ruminococcaceae
302	302	Community A	6.1e-07	42	0.891089		Clostridiales	Firmicutes	Blautia	Clostridia	Lachnospiraceae
303	303	Community A	6.1e-07	77	0.891089		Clostridiales	Firmicutes	Blautia	Clostridia	Lachnospiraceae
304			5.3e-07	24	0.485149		Lactobacillales	Firmicutes	Streptococcus	Bacilli	Streptococcaceae
305			3.4e-07	32	0.752475		Clostridiales	Firmicutes	Subdoligranulum	Clostridia	Ruminococcaceae
306	Subdoligranulum sp.	Community C	2.18e-06	27	0.673267	Subdoligranulum sp.	Clostridiales	Firmicutes	Subdoligranulum	Clostridia	Ruminococcaceae
307	Sutterella sp.		1.3e-06	10	0.415842	Sutterella sp.	Burkholderiales	Proteobacteria	Sutterella	Betaproteobacteria	Sutterellaceae
308	S. wadsworthensis		1.42e-06	39	0.60396	S. wadsworthensis	Burkholderiales	Proteobacteria	Sutterella	Betaproteobacteria	Sutterellaceae
309	S. wadsworthensis		1.16e-06	31	0.287129	S. wadsworthensis	Burkholderiales	Proteobacteria	Sutterella	Betaproteobacteria	Sutterellaceae
310			4.8e-07	63	0.60396		Clostridiales	Firmicutes	unclassified Clostridiales	Clostridia	unclassified Clostridiales
311	311	Community Q	3.6e-07	56	0.613861		Clostridiales	Firmicutes	unclassified Clostridiales	Clostridia	unclassified Clostridiales
312			3e-07	60	0.475248		Clostridiales	Firmicutes	unclassified Clostridiales	Clostridia	unclassified Clostridiales
313	Clostridiales uncl.	Community E	2.23e-06	8	0.722772	Clostridiales uncl.	Clostridiales	Firmicutes	unclassified Clostridiales	Clostridia	unclassified Clostridiales
314	Clostridiales uncl.		1.65e-06	11	0.435644	Clostridiales uncl.	Clostridiales	Firmicutes	unclassified Clostridiales	Clostridia	unclassified Clostridiales
315	Clostridiales uncl.		1.21e-06	8	0.554455	Clostridiales uncl.	Clostridiales	Firmicutes	unclassified Clostridiales	Clostridia	unclassified Clostridiales
316	Clostridiales uncl.	Community K	1.63e-06	11	1	Clostridiales uncl.	Clostridiales	Firmicutes	unclassified Clostridiales	Clostridia	unclassified Clostridiales
317	Firmicutes uncl.	Community I	1.51e-06	17	0.643564	Firmicutes uncl.	unclassified Firmicutes	Firmicutes	unclassified Firmicutes	unclassified Firmicutes	unclassified Firmicutes
318			4e-07	25	0.217822		unclassified Firmicutes	Firmicutes	unclassified Firmicutes	unclassified Firmicutes	unclassified Firmicutes
319	Firmicutes uncl.	Community E	1.04e-06	13	0.752475	Firmicutes uncl.	unclassified Firmicutes	Firmicutes	unclassified Firmicutes	unclassified Firmicutes	unclassified Firmicutes
320	Firmicutes uncl.	Community E	1.06e-06	26	0.594059	Firmicutes uncl.	unclassified Firmicutes	Firmicutes	unclassified Firmicutes	unclassified Firmicutes	unclassified Firmicutes
321	321	Community C	5.8e-07	58	0.851485		unclassified Firmicutes	Firmicutes	unclassified Firmicutes	unclassified Firmicutes	unclassified Firmicutes
322			5.6e-07	24	0.29703		unclassified Firmicutes	Firmicutes	unclassified Firmicutes	unclassified Firmicutes	unclassified Firmicutes
323	323		3.4e-07	50	0.742574		unclassified Firmicutes	Firmicutes	unclassified Firmicutes	unclassified Firmicutes	unclassified Firmicutes
324	Rhodospirillales uncl.		2.79e-06	10	0.346535	Rhodospirillales uncl.	Rhodospirillales	Proteobacteria	unclassified Rhodospirillales	Alphaproteobacteria	unclassified Rhodospirillales
325	325	Community P	5.9e-07	69	0.693069		Clostridiales	Firmicutes	unclassified Ruminococcaceae	Clostridia	Ruminococcaceae
326	Faecalibacterium uncl.		6.7e-07	32	0.29703	Faecalibacterium uncl.	Clostridiales	Firmicutes	Faecalibacterium	Clostridia	Ruminococcaceae
327	Faecalibacterium uncl.		1.27e-06	80	0.435644	Faecalibacterium uncl.	Clostridiales	Firmicutes	Faecalibacterium	Clostridia	Ruminococcaceae
328	328	Community Q	3.9e-07	56	0.584158		Clostridiales	Firmicutes	Faecalibacterium	Clostridia	Ruminococcaceae
329	329		4.7e-07	79	0.485149		Clostridiales	Firmicutes	Ruminococcus	Clostridia	Ruminococcaceae
